# Supplementary material for: Silicon-aryl cooperative activation of ammonia
Source: Royal Society of Chemistry journal article supplement (doi:10.1039/d4cc04617j), 2024-01-01
Supplement: d4cc04617j1.pdf [file d4cc04617j1.pdf]

# Supporting Information

## **Silicon-Aryl Cooperative Activation of Ammonia**

*Martin Ernst Doleschal, Arseni Kostenko, Jin Yu Liu and Shigeyoshi Inoue\**

\*s.inoue@tum.de

## Table of Content

|                                |    |
|--------------------------------|----|
| Experimental.....              | 3  |
| Spectra .....                  | 5  |
| Computational Details .....    | 8  |
| Crystallographic Details ..... | 42 |
| References .....               | 45 |

# Experimental

## General procedures

All experiments were performed under a dry argon ( $\geq 99.996\%$ ) atmosphere using standard *Schlenk* techniques or in a glovebox (MBraun GmbH). Non-deuterated solvents used were distilled over sodium/benzophenone and stored over molecular sieve prior to use. Ammonia (99.98%) was purchased from Westfalen AG. Liquid Injection Field Desorption Ionization Mass Spectrometry (LIFDI-MS) was measured directly from an inert atmosphere glovebox with a Thermo Fisher Scientific Exactive Plus Orbitrap equipped with an ion source from Linden CMS.<sup>1</sup> NMR spectra were recorded on *Bruker* AV-400 or AV-500C spectrometers at ambient temperature (300 K).  $^1\text{H}$ ,  $^{13}\text{C}$ , and  $^{29}\text{Si}$  chemical shifts  $\delta$  are reported in parts per million (ppm) relative to tetramethylsilane.  $\delta(^1\text{H})$  and  $\delta(^{13}\text{C})$  were referenced internally to the relevant residual solvent resonances.  $\delta(^{29}\text{Si})$  was referenced to the signal of tetramethylsilane ( $\delta = 0$  ppm) as external standard. For reported signals, the following abbreviations are used: s = singlet, d = doublet, hept = heptet, m = multiplet/signal overlap, br = broad signal, dd = doublet of doublets, dt = doublet of triplets. Melting Points (m.p.) were determined in sealed glass capillaries under an inert gas atmosphere using a Büchi B-540 melting point apparatus. Compound **1** was prepared according to literature procedures.<sup>2</sup>

**3-(2,6-diisopropylphenyl)-5-(1,1,1,3,3,3-hexamethyl-2-(tri-*p*-tolylsilyl)trisilan-2-yl)-5a,9-diisopropyl-3,5,5a,8-tetrahydrobenzo[e]imidazo[1,2-a][1,3,4]azaphosphasilin-5-amine (2)**

In a *J-Young* PTFE tube, IDippPSi(TMS)<sub>2</sub>(SiTol<sub>3</sub>) (**1**, 50 mg, 54.1 μmol) was dissolved in toluene and briefly immersed in liquid nitrogen until the solvent was frozen solid. The remaining argon atmosphere was removed *in vacuo* and ammonia (1 bar) was filled into the tube. While the solution was warmed to room temperature, its color changed from dark brown to yellow. The complete formation of **2** was confirmed *via* <sup>31</sup>P NMR. Crystals of compound **2** could be obtained from a saturated pentane solution (37.5 mg, 74%).

<sup>1</sup>H NMR (500 MHz, C<sub>6</sub>D<sub>6</sub>) δ 7.89 (d, *J* = 8.0 Hz, 6H), 7.19 – 7.13 (m, 2H), 7.10 (d, *J* = 7.5 Hz, 6H), 7.03 (dd, *J* = 5.7, 3.5 Hz, 1H), 6.20 (dd, *J* = 2.2, 1.2 Hz, 1H), 6.09 (dd, *J* = 2.2, 1.1 Hz, 1H), 5.50 (dt, *J* = 10.0, 3.4 Hz, 1H), 5.40 (dt, *J* = 9.9, 1.8 Hz, 1H), 3.06 (hept, *J* = 6.8 Hz, 1H), 2.82 (hept, *J* = 6.9 Hz, 1H), 2.75 – 2.65 (m, 2H), 2.11 (s, 9H), 2.12 – 1.99 (m, 2H), 1.51 (d, *J* = 6.8 Hz, 3H), 1.43 (d, *J* = 6.8 Hz, 3H), 1.11 (d, *J* = 6.9 Hz, 3H), 1.06 (d, *J* = 7.0 Hz, 3H), 1.05 (br, 2H), 1.03 (d, *J* = 7.0 Hz, 3H), 0.94 (dd, *J* = 9.3, 6.8 Hz, 6H), 0.82 (d, *J* = 6.9 Hz, 3H), 0.49 (d, *J* = 5.5 Hz, 18H).

<sup>13</sup>C NMR (126 MHz, C<sub>6</sub>D<sub>6</sub>) δ 173.19 (d, *J* = 103.5 Hz), 147.58, 146.68, 138.80, 137.64, 136.07, 134.95, 133.90, 132.48, 130.32, 129.76, 128.82, 128.35, 124.75, 124.22, 120.64, 119.94 (d, *J* = 4.9 Hz), 118.87, 48.39 (d, *J* = 2.5 Hz), 31.37, 29.17, 28.81 (d, *J* = 7.0 Hz), 26.60, 24.78 (d, *J* = 6.5 Hz), 24.18, 24.04 (d, *J* = 3.5 Hz), 22.54, 21.53, 21.47, 21.44, 20.22, 4.87 (d, *J* = 5.5 Hz), 4.65 (d, *J* = 3.9 Hz).

<sup>29</sup>Si NMR (99 MHz, C<sub>6</sub>D<sub>6</sub>) δ 3.23 (d, *J* = 91.8 Hz, P-Si), -9.30 (d, *J* = 67.3 Hz, TMS), -10.35 (d, *J* = 9.6 Hz, SiTol<sub>3</sub>), -121.07 (d, *J* = 27.4 Hz, Si(TMS)<sub>2</sub>(SiTol<sub>3</sub>)).

<sup>31</sup>P NMR (162 MHz, C<sub>6</sub>D<sub>6</sub>) δ -133.09.

LIFDI-MS: calculated: 939.4780; found: 939.4768.

m.p.: 214.4 °C

# Spectra

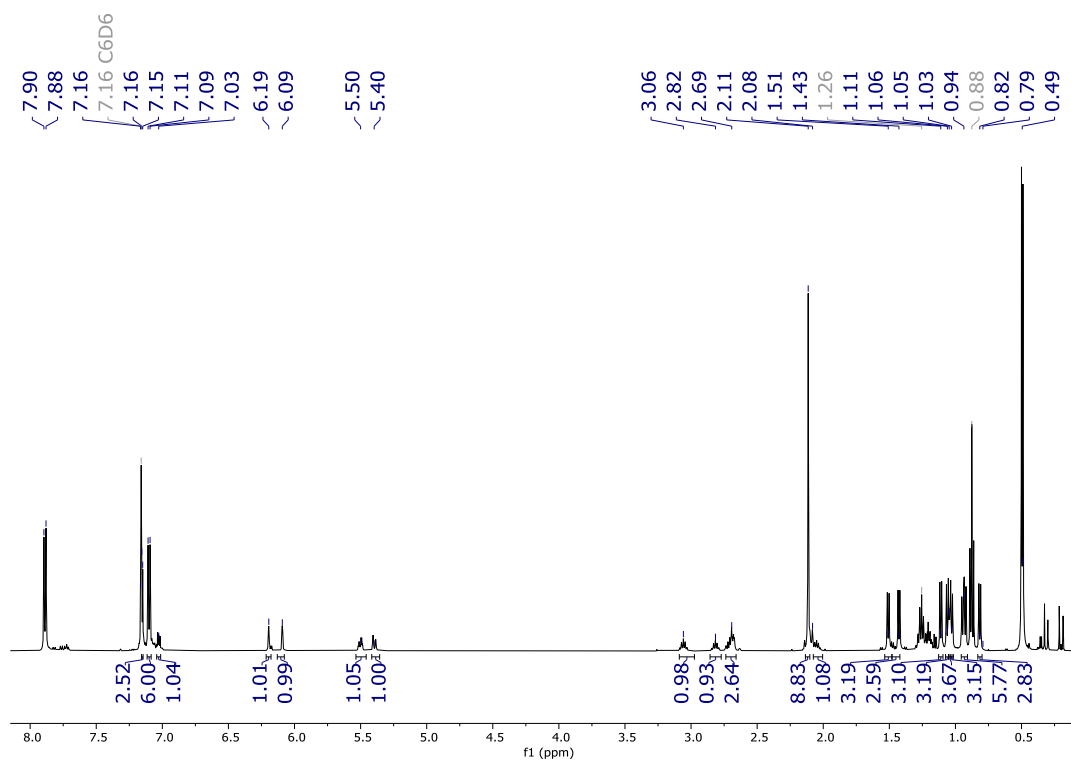

Supplementary Figure 1: <sup>1</sup>H NMR of 2. Signals marked in grey correspond to co-crystallized pentane.

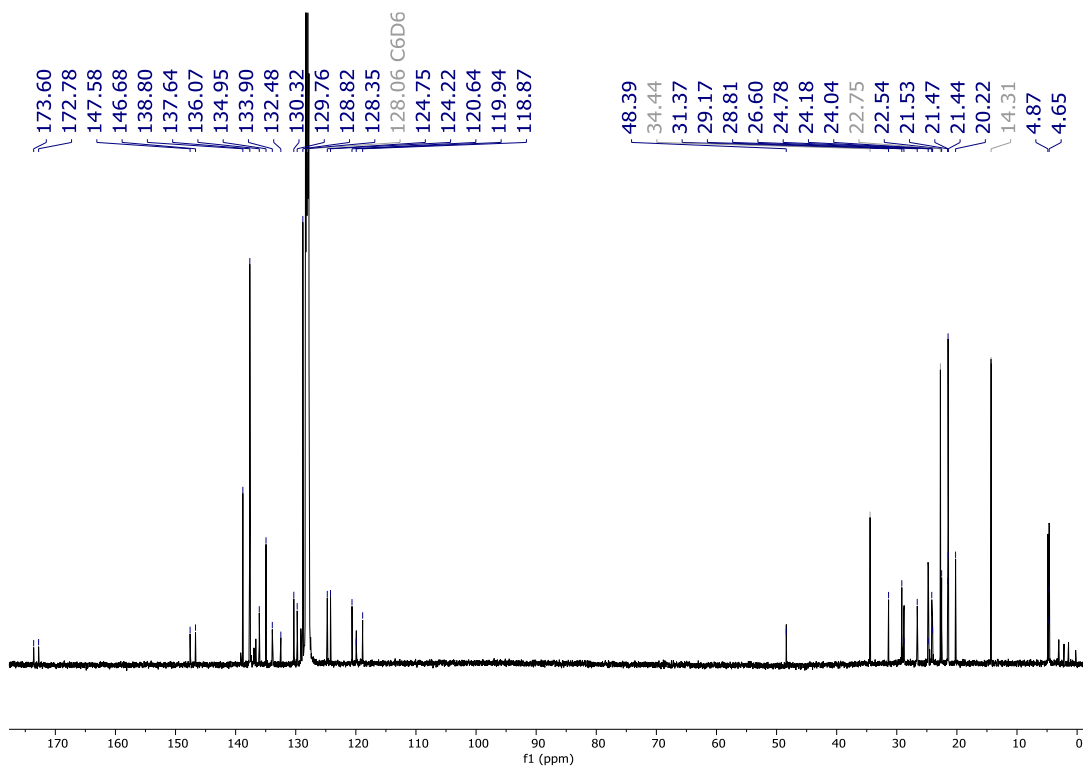

Supplementary Figure 2: <sup>13</sup>C NMR of 2. Signals marked in grey correspond to co-crystallized pentane.

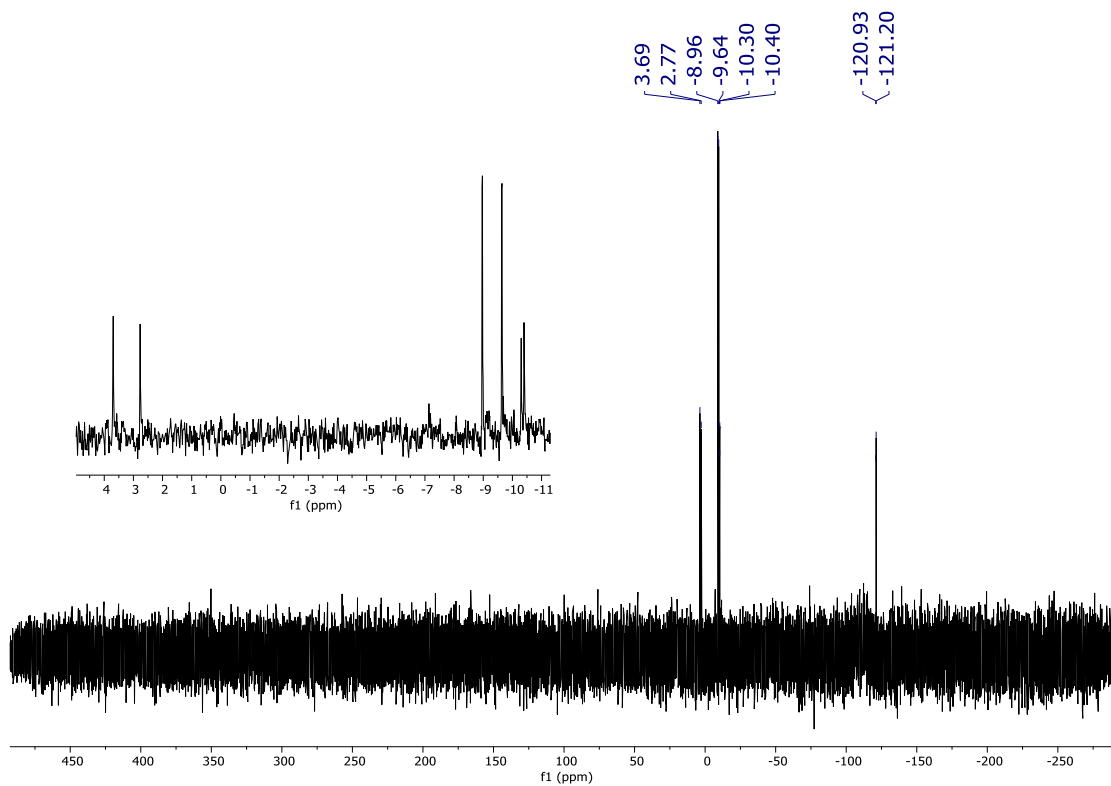

Supplementary Figure 3: <sup>29</sup>Si NMR of 2.

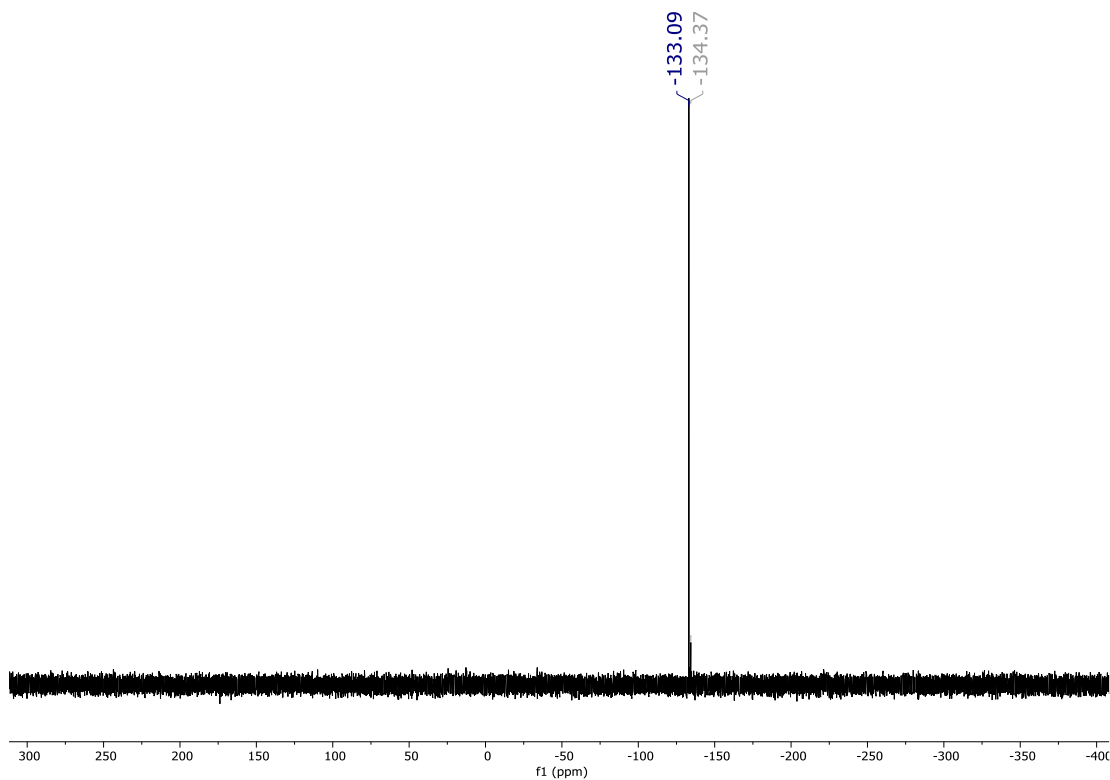

Supplementary Figure 4: <sup>31</sup>P NMR of 2. The signal in grey is IDippPH, a ubiquitous impurity when working with Dipp-NHCPs.

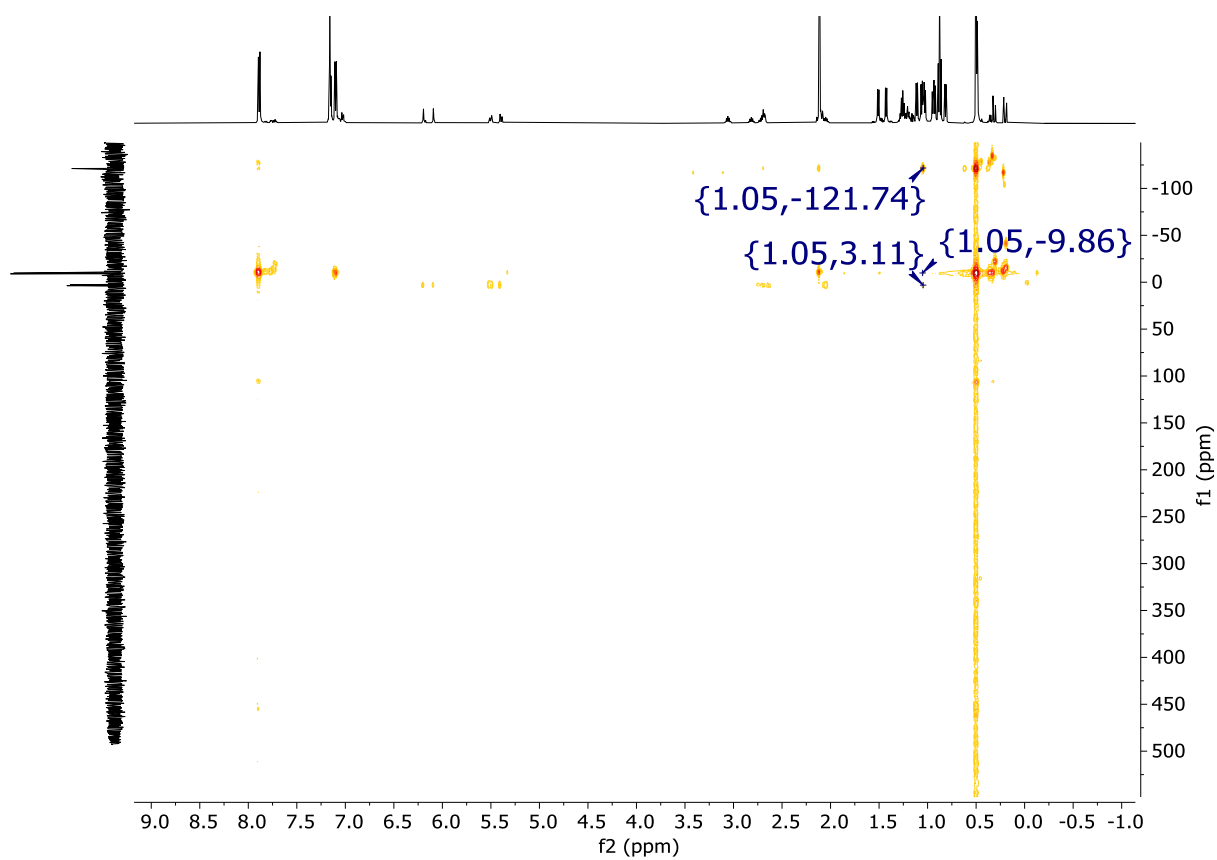

Supplementary Figure 5: SiH HMBC spectrum of **2**.

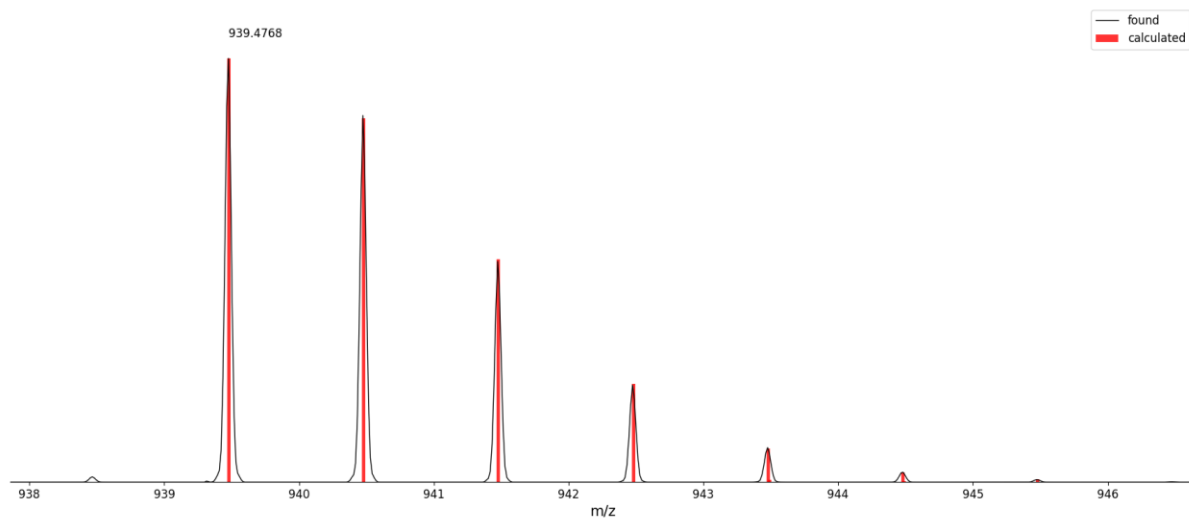

Supplementary Figure 6: LIFDI-MS spectrum of **2**.

## Computational Details

Calculations were carried out using ORCA 5.0.4 software.<sup>3</sup>

Geometry optimizations were carried using the r<sup>2</sup>SCAN-3c composite method, utilizing the regularized and restored SCAN functional,<sup>4,5</sup> geometrical counterpoise correction gCP,<sup>6</sup> the atom-pairwise dispersion correction based on tight binding partial charges (D4,<sup>7-9</sup> the def2-mTZVPP basis set and def2-mTZVPP/J auxiliary basis set.<sup>10</sup>

The optimized geometries were verified as minima or transition states by analytical frequency calculations. The transition states were additionally verified by IRC calculations. Single point calculations of the optimized geometries were carried out at the r<sup>2</sup>SCAN-3c level in benzene using the SMD solvation module<sup>11</sup> to obtain electrostatic contribution and the cavity term to account for the solvent effects.

To get more accurate electronic energies for the mechanistic investigations, single point calculations of the r<sup>2</sup>SCAN-3c optimized geometries were carried out using the PW6B95<sup>12</sup> functional, with D4 dispersion correction, the def2-QZVPP<sup>13</sup> basis set and def2/J<sup>14</sup> and def2-QZVPP/C<sup>15</sup> auxiliary basis sets. The method is denoted as PW6B95-D4(SMD=Benzene)/def2-QZVPP//r<sup>2</sup>SCAN-3c. The summary of the thermochemistry results is presented in Supplementary Table 1.



**Supplementary Table 1:** Calculated energies (Eh).  $E_{PW6B95}$  - electronic energy at the PW6B95-D4/def2-QZVPP//r<sup>2</sup>SCAN-3c level; G-E<sub>el</sub> - Gibbs energy minus the electronic energy at the r<sup>2</sup>SCAN-3c// r<sup>2</sup>SCAN-3c level; G<sub>cds</sub> (cavity term) and G<sub>enp</sub> (electrostatic contribution) at r<sup>2</sup>SCAN-3c SMD=Benzene// r<sup>2</sup>SCAN-3c level; G<sub>conc</sub> - concentration-induced free-energy shift (G<sub>conc</sub> = RTln(24.5)); G – free energy at the PW6B95-D4(SMD=Benzene)/def2-QZVPP//r<sup>2</sup>SCAN-3c level,  $G = E_{PW6B95} + [G-E_{el}] + G_{cds} + G_{enp} + G_{conc}$ . Thermochemistry at 298.15 K.

| Compound        | ID      | $E_{PW6B95}$ | G-E <sub>el</sub> | G <sub>cds</sub> | G <sub>enp</sub> | G <sub>conc</sub> | G           |
|-----------------|---------|--------------|-------------------|------------------|------------------|-------------------|-------------|
| NH <sub>3</sub> | 3755810 | -56.65245    | 0.01638           | -0.00500         | 0.00237          | 0.00302           | -56.63568   |
| <b>1</b>        | 3519997 | -4007.10251  | 1.05124           | -0.02633         | -0.02620         | 0.00302           | -4006.10077 |
| <b>TS(1-A)</b>  | 3519955 | -4063.75419  | 1.08593           | -0.02749         | -0.02623         | 0.00302           | -4062.71897 |
| <b>A</b>        | 3520171 | -4063.77777  | 1.08904           | -0.02758         | -0.02674         | 0.00302           | -4062.74003 |
| <b>TS(A-B)</b>  | 3519949 | -4063.75442  | 1.09113           | -0.02534         | -0.02551         | 0.00302           | -4062.71112 |
| <b>B</b>        | 3520170 | -4063.75635  | 1.09098           | -0.02581         | -0.02555         | 0.00302           | -4062.71371 |
| <b>TS(B-2)</b>  | 3519725 | -4063.74961  | 1.08816           | -0.02520         | -0.02506         | 0.00302           | -4062.70870 |
| <b>2</b>        | 3518893 | -4063.80112  | 1.09138           | -0.02377         | -0.02489         | 0.00302           | -4062.75537 |
| <b>TS(1-C)</b>  | 3520303 | -4007.07561  | 1.05237           | -0.02201         | -0.02625         | 0.00302           | -4006.06848 |
| <b>C</b>        | 3520751 | -4007.07735  | 1.05216           | -0.02179         | -0.02606         | 0.00302           | -4006.07003 |
| <b>TS(C-D)</b>  | 3979989 | -4007.07945  | 1.05337           | -0.02116         | -0.02544         | 0.00302           | -4006.06966 |
| <b>D</b>        | 3919971 | -4007.09070  | 1.05402           | -0.02103         | -0.02492         | 0.00302           | -4006.07960 |
| <b>TS(D-E)</b>  | 3919973 | -4007.06803  | 1.05392           | -0.02167         | -0.02582         | 0.00302           | -4006.05857 |
| <b>E</b>        | 3922447 | -4007.09744  | 1.05451           | -0.02161         | -0.02590         | 0.00302           | -4006.08742 |
| <b>TS(A-F)</b>  | 3919972 | -4063.71407  | 1.08275           | -0.02544         | -0.02670         | 0.00302           | -4062.68044 |
| <b>F</b>        | 3975127 | -4063.81571  | 1.08678           | -0.02589         | -0.02642         | 0.00302           | -4062.77822 |
| <b>G</b>        | 4152498 | -4120.43877  | 1.12460           | -0.02931         | -0.02495         | 0.00302           | -4119.36541 |
| <b>TS(G-H)</b>  | 4144987 | -4120.41135  | 1.12410           | -0.02756         | -0.02531         | 0.00302           | -4119.33710 |
| <b>H</b>        | 4147236 | -4120.47569  | 1.11953           | -0.02669         | -0.02406         | 0.00302           | -4119.40389 |
| <b>I</b>        | 4144972 | -4120.41603  | 1.12303           | -0.02775         | -0.02392         | 0.00302           | -4119.34164 |
| <b>TS(I-J)</b>  | 4140701 | -4120.40055  | 1.12399           | -0.03002         | -0.02421         | 0.00302           | -4119.32778 |
| <b>J</b>        | 4143801 | -4120.45885  | 1.12545           | -0.02685         | -0.02338         | 0.00302           | -4119.38061 |

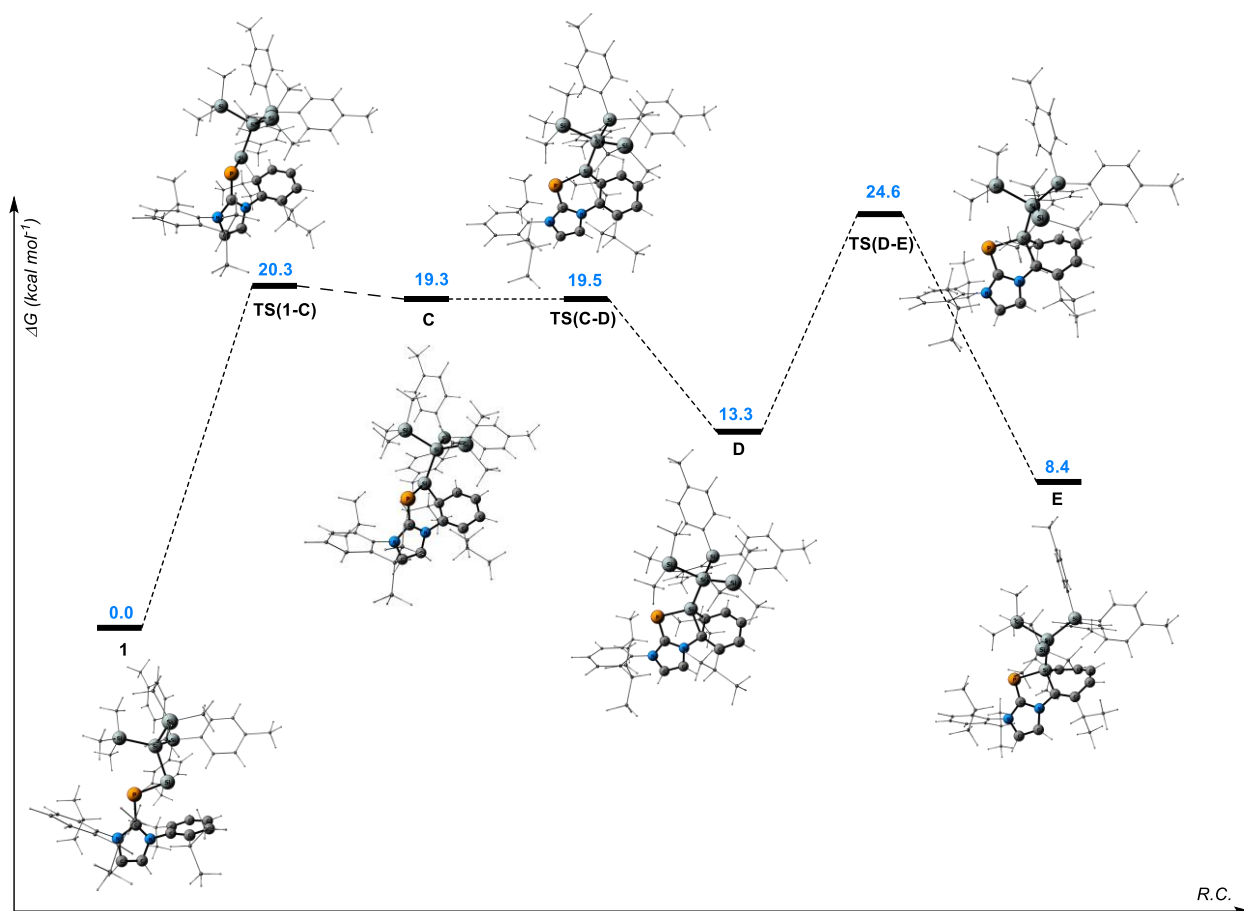

**Supplementary Figure 7:** Calculated free energy reaction coordinate diagram of the proposed mechanism for the conversion of **1** to the silepin **E** at the PW6B95-D4/def2-QZVPP(SMD = Benzene)//r<sup>2</sup>SCAN-3c level of theory.

Supplementary Figure 7 describes the intermolecular insertion of the silylene into the C-C bond of the aryl substituent of the NHCP moiety. The first step is the formation of the Meisenheimer-type complex **C**, which rearranges to the formal product of [1+2] cycloaddition of the Si across the aromatic C-C bond **D**. The final step is the ring expansion to yield the final silepin product **E**, via the rate determining transition state **TS(D-E)** at 24.6 kcal mol<sup>-1</sup>. **TS(D-E)** is by 7.2 kcal mol<sup>-1</sup> higher than the rate determining transition state **TS(B-2)** that leads to the formation of **2**. In any case, the whole process is endergonic by 8.4 kcal mol<sup>-1</sup> and thus the **E** would not be observed even with more favorable kinetics. In addition, the transition state **TS(1-C)**, which leads to the Meisenheimer-type complex **C**, is also higher than **TS(B-2)**. Thus, we rule out **C** as an intermediate in the formation of **2**.

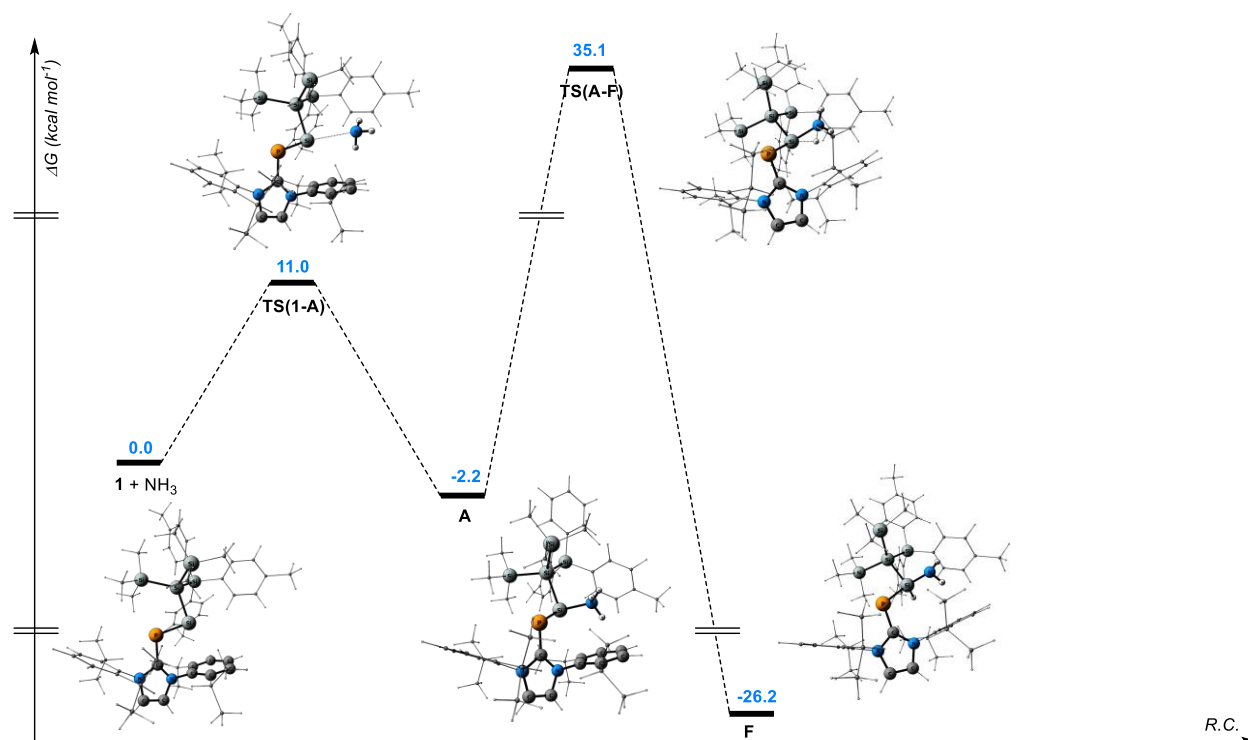

**Supplementary Figure 8:** Calculated free energy reaction coordinate diagram for 1,1-addition of ammonia at the Si center of **1** at the PW6B95-D4/def2-QZVPP(SMD = Benzene)//r<sup>2</sup>SCAN-3c level of theory.

Supplementary Figure 8 describes the oxidative addition of the silylene by insertion into the N-H bond of ammonia. Upon initial coordination of an ammonia molecule to the silylene center via **TS(1-A)** the resulting complex **A** undergoes the 1,1-addition to form the product **F** in a very exergonic step. However, the barrier for this reaction **TS(A-F)** of 37.3 kcal mol<sup>-1</sup> is infeasible.

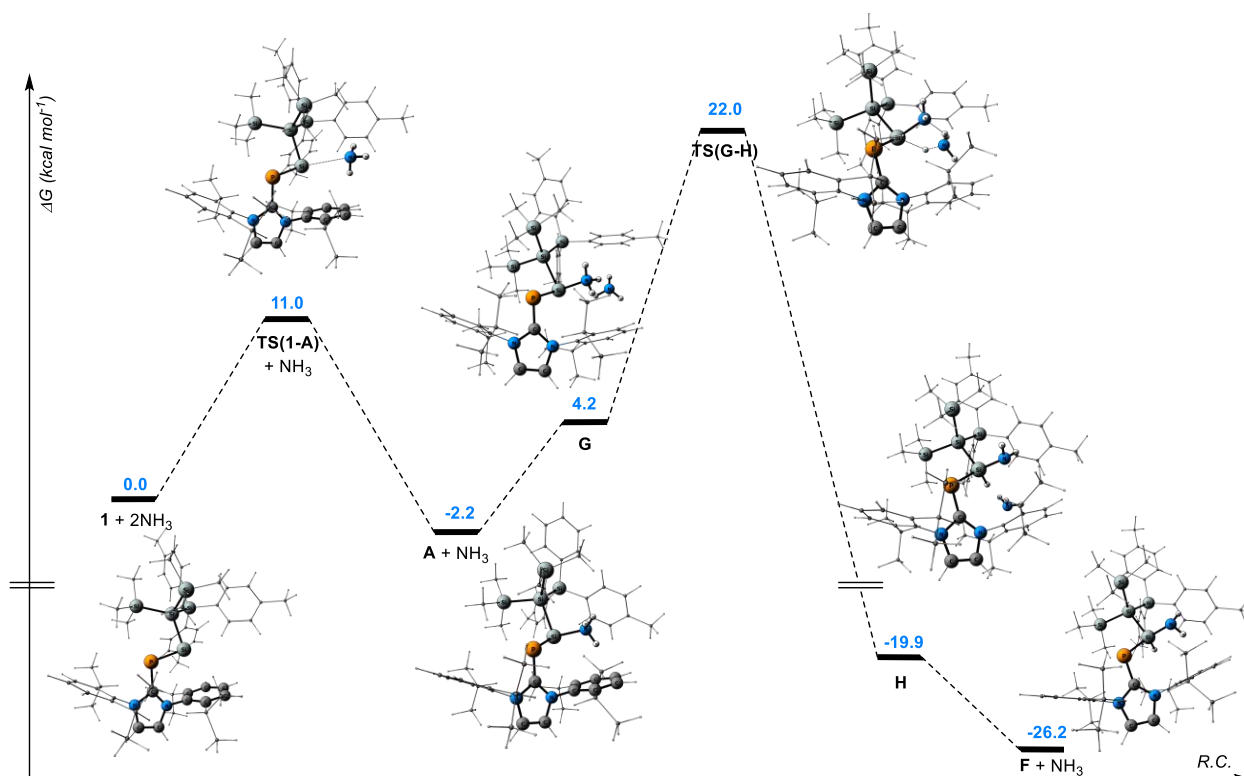

**Supplementary Figure 9:** Calculated free energy reaction coordinate diagram for 1,1-addition of ammonia at the Si center of **1** via proton shuffling mechanism at the PW6B95-D4/def2-QZVPP(SMD = Benzene)//r<sup>2</sup>SCAN-3c level of theory.

Supplementary Figure 9 describes the oxidative addition of the Si by two ammonia molecules. Upon formation of complex **A**, a second molecule of NH<sub>3</sub> can abstract a proton for the ammonia molecule that is coordinated to the silicon center, while simultaneously transferring a proton the silicon center. The rate determining transition state **TS(G-H)** at 22.0 kcal mol<sup>-1</sup> is by 4.6 kcal mol<sup>-1</sup> lower in energy than **TS(B-2)**. Therefore, the activation of ammonia via the mechanism presented in Fig. 2 of the main text, in which the single ammonia molecule is activated across the Si and the C centers is much more favorable.

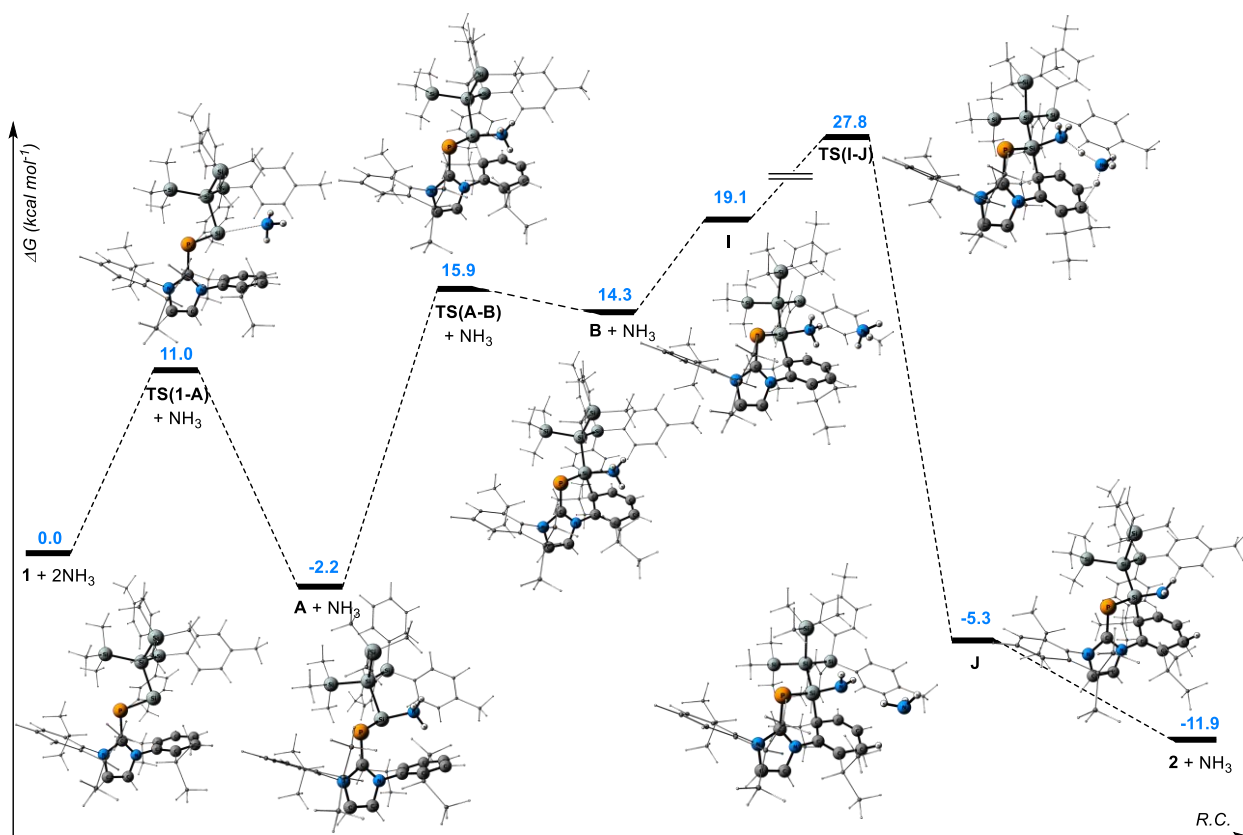

**Supplementary Figure 10:** Calculated free energy reaction coordinate diagram for cooperative silylene-aryl activation of ammonia via proton shuffling mechanism at the PW6B95-D4/def2-QZVPP(SMD = Benzene)//r<sup>2</sup>SCAN-3c level of theory.

Supplementary Figure 10 describes the ammonia activation across the Si center of the silylene and the C center of the aryl via a proton shuffling mechanism. Upon formation of complex **B**, a second molecule of NH<sub>3</sub> comes in. Via **TS(I-J)** a proton from the first ammonia molecule that is coordinated to the Si center is transferred to second ammonia molecule, while a proton from the second ammonia molecule is transferred to the C center. The rate determining transition state **TS(I-J)** at 27.8 kcal mol<sup>-1</sup> is by 10.4 kcal mol<sup>-1</sup> lower in energy than **TS(B-2)**. Therefore, the mechanism presented in Fig. 2 of the main text, in which the single ammonia molecule is activated across the Si and the C centers is much more favorable.

## Cartesian coordinates and energies of the optimized geometries at the r<sup>2</sup>SCAN-3c level

Calculated energies and coordinates of **1**

|                         |     |                   |   |           |           |           |
|-------------------------|-----|-------------------|---|-----------|-----------|-----------|
| Electronic energy       | ... | -4000.71363631 Eh | H | -5.151342 | 2.744421  | -3.553946 |
| Total Enthalpy          | ... | -3999.48791788 Eh | C | -3.050674 | 4.105187  | 0.347704  |
| Final Gibbs free energy | ... | -3999.66239289 Eh | H | -4.043776 | 4.516834  | 0.258581  |
|                         |     |                   | C | -1.869089 | 4.683672  | 0.670612  |
|                         |     |                   | H | -1.624935 | 5.702931  | 0.923232  |
|                         |     |                   | C | 0.462899  | 3.863812  | 1.052721  |
|                         |     |                   | C | 1.374427  | 4.434833  | 0.153945  |
|                         |     |                   | C | 2.683876  | 4.615003  | 0.602774  |
|                         |     |                   | H | 3.422301  | 5.047060  | -0.065113 |
|                         |     |                   | C | 3.062169  | 4.229448  | 1.880667  |
|                         |     |                   | H | 4.090051  | 4.367251  | 2.203803  |
|                         |     |                   | C | 2.136109  | 3.662342  | 2.745440  |
|                         |     |                   | H | 2.444316  | 3.371762  | 3.745304  |
|                         |     |                   | C | 0.811388  | 3.468973  | 2.353749  |
|                         |     |                   | C | -0.203351 | 2.915535  | 3.337856  |
|                         |     |                   | H | -1.091685 | 2.602770  | 2.779980  |
|                         |     |                   | C | 0.301233  | 1.675148  | 4.080266  |
|                         |     |                   | H | 0.596485  | 0.890820  | 3.377907  |
|                         |     |                   | H | -0.495650 | 1.276052  | 4.716464  |
|                         |     |                   | H | 1.153891  | 1.902573  | 4.729407  |
|                         |     |                   | C | -0.632509 | 4.015888  | 4.320973  |
|                         |     |                   | H | -1.035224 | 4.887743  | 3.793919  |
|                         |     |                   | H | 0.219212  | 4.351534  | 4.923571  |
|                         |     |                   | H | -1.404165 | 3.638800  | 5.001646  |
|                         |     |                   | C | 0.972440  | 4.872536  | -1.242228 |
|                         |     |                   | H | 0.034794  | 4.363979  | -1.498783 |
|                         |     |                   | C | 2.001147  | 4.472707  | -2.305416 |
|                         |     |                   | H | 1.605349  | 4.695089  | -3.301790 |
|                         |     |                   | H | 2.213120  | 3.400668  | -2.262485 |
|                         |     |                   | H | 2.940803  | 5.024158  | -2.192848 |
|                         |     |                   | C | 0.734790  | 6.390910  | -1.278726 |
|                         |     |                   | H | 1.660391  | 6.928441  | -1.042574 |
|                         |     |                   | H | -0.023849 | 6.705056  | -0.555005 |
|                         |     |                   | H | 0.405154  | 6.702094  | -2.275966 |
|                         |     |                   | C | 0.708572  | -0.819893 | -5.105265 |
|                         |     |                   | H | 0.479582  | -1.316025 | -6.057015 |
|                         |     |                   | H | 1.596079  | -0.197124 | -5.251886 |
|                         |     |                   | H | -0.124537 | -0.151940 | -4.859775 |
|                         |     |                   | C | 2.354285  | -3.276869 | -4.248514 |
|                         |     |                   | H | 2.135141  | -3.732204 | -5.222695 |
|                         |     |                   | H | 2.474118  | -4.081672 | -3.515101 |
|                         |     |                   | H | 3.311833  | -2.751460 | -4.331092 |
|                         |     |                   | C | -0.636565 | -3.136948 | -3.676493 |
|                         |     |                   | H | -1.515463 | -2.507578 | -3.496604 |
|                         |     |                   | H | -0.594141 | -3.900423 | -2.892636 |
|                         |     |                   | H | -0.785099 | -3.648377 | -4.636135 |
|                         |     |                   | C | 3.888305  | 1.199199  | -0.542510 |
|                         |     |                   | H | 4.761017  | 1.792613  | -0.844649 |
|                         |     |                   | H | 4.078636  | 0.801484  | 0.459139  |
|                         |     |                   | H | 3.029895  | 1.875631  | -0.468737 |
|                         |     |                   | C | 3.891082  | 0.524189  | -3.513271 |
|                         |     |                   | H | 4.876314  | 1.005550  | -3.556162 |
|                         |     |                   | H | 3.134552  | 1.278181  | -3.758653 |

|   |           |           |           |
|---|-----------|-----------|-----------|
| H | 3.860403  | -0.247190 | -4.289873 |
| C | 4.928666  | -1.509002 | -1.465581 |
| H | 4.846390  | -2.355413 | -2.155562 |
| H | 4.854084  | -1.888523 | -0.439903 |
| H | 5.925677  | -1.066650 | -1.587713 |
| C | -0.602938 | -2.677756 | 0.753117  |
| C | -1.709571 | -2.487030 | -0.082404 |
| H | -1.555259 | -2.201348 | -1.120214 |
| C | -3.008368 | -2.630329 | 0.391646  |
| H | -3.847985 | -2.461127 | -0.279401 |
| C | -3.249340 | -2.967830 | 1.724771  |
| C | -4.652758 | -3.175747 | 2.225763  |
| H | -5.369079 | -2.582078 | 1.649607  |
| H | -4.746708 | -2.906807 | 3.282870  |
| H | -4.947517 | -4.228455 | 2.130838  |
| C | -2.151531 | -3.134634 | 2.572154  |
| H | -2.316745 | -3.379876 | 3.619765  |
| C | -0.852464 | -2.993663 | 2.094808  |
| H | -0.017207 | -3.125919 | 2.780055  |
| C | 2.323366  | -2.155551 | 1.518061  |
| C | 2.443154  | -0.823396 | 1.938030  |
| H | 1.879339  | -0.044265 | 1.425673  |
| C | 3.270410  | -0.471660 | 2.998006  |
| H | 3.343284  | 0.573468  | 3.295073  |
| C | 4.014306  | -1.436859 | 3.681157  |
| C | 3.892758  | -2.767395 | 3.275464  |
| H | 4.454545  | -3.539060 | 3.798260  |
| C | 3.063930  | -3.120210 | 2.214199  |
| H | 2.992028  | -4.166207 | 1.923903  |
| C | 4.940524  | -1.048112 | 4.801383  |
| H | 5.082177  | -1.872635 | 5.506392  |
| H | 4.556287  | -0.184768 | 5.353523  |
| H | 5.929361  | -0.774472 | 4.412549  |
| C | 2.921170  | -4.683124 | -0.830919 |
| H | 3.719718  | -3.960155 | -0.682105 |
| C | 3.239373  | -5.939059 | -1.331668 |
| H | 4.275437  | -6.179319 | -1.563233 |

|   |           |           |           |
|---|-----------|-----------|-----------|
| H | -2.581649 | 11.201973 | 3.556213  |
| C | -2.338294 | 10.116192 | 5.405490  |
| C | -2.143774 | 8.806799  | 5.844810  |
| H | -2.513188 | 7.980872  | 5.240334  |
| C | -1.487761 | 8.540798  | 7.044610  |
| H | -1.356245 | 7.508030  | 7.360152  |
| C | -1.005497 | 9.576054  | 7.852910  |
| C | -1.906494 | 8.602327  | 15.947349 |
| C | -4.133899 | 9.272733  | 16.861371 |
| C | -4.159727 | 10.479442 | 17.570770 |
| C | -2.935405 | 11.045117 | 18.265398 |
| H | -2.163304 | 10.268321 | 18.291704 |
| C | -3.225535 | 11.441983 | 19.718013 |
| H | -3.919419 | 12.287234 | 19.775700 |
| H | -2.298278 | 11.745873 | 20.215422 |
| H | -3.661124 | 10.609506 | 20.280678 |
| C | -6.472407 | 10.722928 | 16.899144 |
| H | -7.395050 | 11.296175 | 16.909107 |
| C | -6.413104 | 9.524646  | 16.196988 |
| H | -7.288993 | 9.180044  | 15.657988 |
| C | -5.240992 | 8.772202  | 16.158397 |
| C | -5.358253 | 11.196482 | 17.573830 |
| H | -5.412390 | 12.142987 | 18.103424 |
| C | -2.368823 | 12.229218 | 17.467376 |
| H | -2.107985 | 11.926973 | 16.447444 |
| H | -1.470301 | 12.621051 | 17.957207 |
| H | -3.101867 | 13.041397 | 17.404578 |
| C | -2.540195 | 7.684563  | 17.927893 |
| H | -3.192119 | 7.506272  | 18.768577 |
| C | -1.291153 | 7.241149  | 17.656842 |
| H | -0.629894 | 6.595110  | 18.212358 |
| C | -0.101599 | 7.387865  | 9.816439  |
| C | -0.882145 | 6.707941  | 10.755499 |
| H | -1.597282 | 7.259198  | 11.362241 |
| C | -0.765087 | 5.332338  | 10.939389 |
| H | -1.394930 | 4.834250  | 11.673546 |
| C | 0.147777  | 4.584574  | 10.196440 |
| C | 0.940772  | 5.256711  | 9.260789  |
| H | 1.667187  | 4.697001  | 8.674477  |
| C | 0.816727  | 6.627937  | 9.075161  |
| H | 1.458660  | 7.123614  | 8.348760  |
| C | 0.266177  | 3.095538  | 10.378905 |
| H | -0.256908 | 2.560134  | 9.577019  |
| H | -0.171017 | 2.775183  | 11.329338 |
| H | 1.312307  | 2.773494  | 10.354872 |
| C | -1.851387 | 11.156623 | 6.203279  |
| H | -1.992879 | 12.187364 | 5.883453  |
| C | -1.207021 | 10.890071 | 7.403199  |
| H | -0.868017 | 11.725297 | 8.013935  |
| C | 1.597052  | 9.828555  | 9.470837  |
| C | 2.123177  | 10.629002 | 8.450974  |
| H | 1.486991  | 10.936504 | 7.623916  |
| C | 3.455975  | 11.030121 | 8.459005  |
| H | 3.834595  | 11.650443 | 7.648993  |
| C | 4.318595  | 10.642441 | 9.485330  |
| C | 5.750398  | 11.103902 | 9.513778  |
| H | 5.851408  | 12.025683 | 10.100366 |
| H | 6.121398  | 11.314780 | 8.506472  |

#### Calculated energies and coordinates of TS[1-A]

Electronic energy ... -4057.25049648 Eh  
 Total Enthalpy ... -4055.98548895 Eh  
 Final Gibbs free energy ... -4056.16457146 Eh

#### CARTESIAN COORDINATES (ANGSTROM)

|    |           |           |           |
|----|-----------|-----------|-----------|
| Si | -0.206789 | 9.257034  | 9.531505  |
| Si | -1.417474 | 10.302546 | 11.270695 |
| Si | -0.385266 | 9.248172  | 13.175517 |
| P  | -2.151866 | 9.579011  | 14.441484 |
| Si | -3.737436 | 9.927626  | 10.911178 |
| Si | -1.063664 | 12.649281 | 11.266174 |
| N  | -2.915405 | 8.505622  | 16.879019 |
| N  | -0.915283 | 7.789666  | 16.441301 |
| N  | 2.030988  | 11.293416 | 13.324057 |
| C  | -3.077104 | 10.410957 | 4.128630  |
| H  | -4.097578 | 10.753037 | 4.340327  |
| H  | -3.149317 | 9.522485  | 3.495135  |

|   |           |           |           |
|---|-----------|-----------|-----------|
| H | 6.402412  | 10.352870 | 9.970378  |
| C | 3.807121  | 9.823142  | 10.495930 |
| H | 4.464044  | 9.488462  | 11.297283 |
| C | 2.474969  | 9.423946  | 10.488653 |
| H | 2.107805  | 8.781055  | 11.288790 |
| C | -4.781939 | 10.904932 | 12.151506 |
| H | -4.559073 | 11.976619 | 12.126797 |
| H | -4.607225 | 10.554656 | 13.174348 |
| H | -5.846840 | 10.779938 | 11.914019 |
| C | -4.194318 | 8.100463  | 11.109407 |
| H | -5.282420 | 7.985803  | 11.022153 |
| H | -3.892372 | 7.715145  | 12.090047 |
| H | -3.730758 | 7.481945  | 10.333303 |
| C | -4.284875 | 10.425496 | 9.170221  |
| H | -3.774627 | 9.834556  | 8.402720  |
| H | -4.088349 | 11.481125 | 8.960092  |
| H | -5.365229 | 10.256192 | 9.071588  |
| C | -2.383473 | 13.557549 | 10.252102 |
| H | -3.393566 | 13.379674 | 10.634102 |
| H | -2.368802 | 13.255511 | 9.199484  |
| H | -2.194802 | 14.638163 | 10.293824 |
| C | -1.182956 | 13.246652 | 13.052117 |
| H | -0.368942 | 12.809289 | 13.640153 |
| H | -2.128982 | 12.937570 | 13.511076 |
| H | -1.112574 | 14.340467 | 13.105232 |
| C | 0.600875  | 13.175018 | 10.540291 |
| H | 0.750008  | 14.248610 | 10.713761 |
| H | 0.641378  | 13.001874 | 9.459835  |
| H | 1.441241  | 12.636434 | 10.984636 |
| C | 0.730960  | 6.569204  | 15.088531 |
| C | -0.177041 | 5.393728  | 14.749483 |
| H | 0.198838  | 5.027944  | 13.783788 |
| C | 0.028058  | 4.266114  | 15.775749 |
| H | -0.352703 | 4.563137  | 16.759575 |
| H | 1.086795  | 4.010097  | 15.883346 |
| H | -0.517220 | 3.367436  | 15.466040 |
| C | -1.671112 | 5.668914  | 14.551950 |
| H | -2.125989 | 4.804124  | 14.056033 |
| H | -1.841585 | 6.551751  | 13.927768 |
| H | -2.198698 | 5.806060  | 15.501324 |
| C | 2.031371  | 6.525643  | 14.579321 |
| H | 2.304911  | 5.707901  | 13.917141 |
| C | 2.961344  | 7.508345  | 14.879258 |
| H | 3.961883  | 7.451921  | 14.459830 |
| C | 2.619943  | 8.559281  | 15.720361 |
| H | 2.271060  | 10.480395 | 13.882466 |
| H | 3.365265  | 9.307472  | 15.977081 |
| C | 1.333886  | 8.660695  | 16.248627 |
| C | 0.990727  | 9.789534  | 17.204130 |
| H | -0.088403 | 9.774600  | 17.385806 |
| C | 1.320009  | 11.171479 | 16.631561 |
| H | 2.395755  | 11.291368 | 16.457618 |
| H | 1.015843  | 11.948549 | 17.340816 |
| H | 0.794714  | 11.340436 | 15.687093 |
| C | 1.692053  | 9.566432  | 18.552832 |
| H | 2.781213  | 9.600707  | 18.436861 |
| H | 1.430852  | 8.592468  | 18.980136 |
| H | 1.402425  | 10.345282 | 19.266971 |

|   |           |           |           |
|---|-----------|-----------|-----------|
| C | 0.408329  | 7.662672  | 15.903320 |
| C | -5.160411 | 7.467040  | 15.389296 |
| H | -4.140962 | 7.391326  | 14.989367 |
| C | -6.115249 | 7.416996  | 14.194738 |
| H | -7.160552 | 7.330327  | 14.512404 |
| H | -5.888059 | 6.540619  | 13.579517 |
| H | -6.012226 | 8.305695  | 13.565406 |
| C | -5.408721 | 6.265821  | 16.315214 |
| H | -4.690064 | 6.228650  | 17.139417 |
| H | -5.323117 | 5.329596  | 15.752367 |
| H | -6.416062 | 6.316573  | 16.744513 |
| H | 2.337462  | 11.083106 | 12.379085 |
| H | 2.588795  | 12.073747 | 13.656937 |

#### Calculated energies and coordinates of A

|                         |     |                   |
|-------------------------|-----|-------------------|
| Electronic energy       | ... | -4057.27477323 Eh |
| Total Enthalpy          | ... | -4056.00789667 Eh |
| Final Gibbs free energy | ... | -4056.18573410 Eh |

#### CARTESIAN COORDINATES (ANGSTROEM)

|    |           |           |           |
|----|-----------|-----------|-----------|
| Si | -0.507124 | 9.036752  | 9.307383  |
| Si | -1.752095 | 9.886711  | 11.137602 |
| Si | -0.619042 | 8.798916  | 12.959630 |
| P  | -1.854156 | 9.803818  | 14.582256 |
| Si | -3.952743 | 9.019889  | 11.146018 |
| Si | -1.877299 | 12.253183 | 11.037670 |
| N  | -2.387551 | 8.908225  | 17.142771 |
| N  | -0.408059 | 8.213863  | 16.565220 |
| N  | 0.986416  | 10.059094 | 12.932240 |
| C  | -1.183179 | 12.119219 | 3.937463  |
| H  | -0.244548 | 12.561613 | 3.590787  |
| H  | -1.930781 | 12.914039 | 4.016197  |
| H  | -1.524658 | 11.423248 | 3.161116  |
| C  | -1.001590 | 11.405827 | 5.249566  |
| C  | 0.220557  | 10.818318 | 5.585115  |
| H  | 1.058341  | 10.898024 | 4.895098  |
| C  | 0.381035  | 10.133465 | 6.785321  |
| H  | 1.345499  | 9.683120  | 7.011062  |
| C  | -0.671770 | 10.016666 | 7.703345  |
| C  | -1.496834 | 8.918755  | 16.082862 |
| C  | -3.673888 | 9.542825  | 17.125801 |
| C  | -3.768202 | 10.879315 | 17.533616 |
| C  | -2.552435 | 11.697738 | 17.920886 |
| H  | -1.660262 | 11.091435 | 17.731729 |
| C  | -2.575673 | 12.048088 | 19.414650 |
| H  | -3.435992 | 12.682424 | 19.655799 |
| H  | -1.667103 | 12.593029 | 19.694598 |
| H  | -2.640820 | 11.146665 | 20.033508 |
| C  | -6.159325 | 10.730849 | 17.187276 |
| H  | -7.140116 | 11.197274 | 17.214874 |
| C  | -6.032397 | 9.415678  | 16.757259 |
| H  | -6.915812 | 8.869679  | 16.442098 |
| C  | -4.785226 | 8.794519  | 16.710212 |
| C  | -5.038986 | 11.456176 | 17.564340 |
| H  | -5.150148 | 12.490454 | 17.877905 |
| C  | -2.431288 | 12.956031 | 17.051659 |



|   |           |           |           |
|---|-----------|-----------|-----------|
| H | -2.410132 | 12.685156 | 15.991465 |
| H | -1.506962 | 13.493356 | 17.291821 |
| H | -3.267739 | 13.643088 | 17.220553 |
| C | -1.847730 | 8.257511  | 18.240138 |
| H | -2.391902 | 8.161983  | 19.166438 |
| C | -0.618737 | 7.823505  | 17.884548 |
| H | 0.126677  | 7.273239  | 18.436982 |
| C | -0.979741 | 7.244929  | 8.936827  |
| C | -1.269408 | 6.831137  | 7.629553  |
| H | -1.226311 | 7.551854  | 6.815795  |
| C | -1.622645 | 5.514844  | 7.349513  |
| H | -1.849653 | 5.226476  | 6.325001  |
| C | -1.693680 | 4.557615  | 8.363020  |
| C | -1.412058 | 4.964090  | 9.669492  |
| H | -1.479863 | 4.241758  | 10.481146 |
| C | -1.067057 | 6.280667  | 9.952670  |
| H | -0.886539 | 6.570860  | 10.988736 |
| C | -2.043325 | 3.126966  | 8.055451  |
| H | -1.138990 | 2.539562  | 7.852809  |
| H | -2.685277 | 3.054580  | 7.172465  |
| H | -2.559477 | 2.653715  | 8.896223  |
| C | -2.058346 | 11.286007 | 6.154790  |
| H | -3.020735 | 11.735569 | 5.917866  |
| C | -1.893720 | 10.605226 | 7.355834  |
| H | -2.733498 | 10.528659 | 8.042159  |
| C | 1.321881  | 9.080718  | 9.817326  |
| C | 2.075877  | 10.261390 | 9.704033  |
| H | 1.645202  | 11.127396 | 9.207640  |
| C | 3.366411  | 10.356265 | 10.216401 |
| H | 3.920804  | 11.286751 | 10.108161 |
| C | 3.963562  | 9.269051  | 10.864275 |
| C | 5.348059  | 9.383818  | 11.441941 |
| H | 5.756331  | 8.401184  | 11.695293 |
| H | 5.344454  | 9.991697  | 12.355710 |
| H | 6.033909  | 9.866111  | 10.737705 |
| C | 3.230518  | 8.086397  | 10.963426 |
| H | 3.677865  | 7.220646  | 11.447122 |
| C | 1.936488  | 7.992932  | 10.454240 |
| H | 1.399881  | 7.053487  | 10.552039 |
| C | -5.036667 | 10.057041 | 12.297820 |
| H | -5.105576 | 11.099503 | 11.968967 |
| H | -4.631544 | 10.051528 | 13.316559 |
| H | -6.055290 | 9.648115  | 12.324337 |
| C | -3.971964 | 7.237695  | 11.769269 |
| H | -5.007278 | 6.895194  | 11.892634 |
| H | -3.466325 | 7.158392  | 12.738533 |
| H | -3.472946 | 6.566747  | 11.063523 |
| C | -4.739679 | 9.026100  | 9.423876  |
| H | -4.136644 | 8.452316  | 8.710629  |
| H | -4.860956 | 10.042241 | 9.032048  |
| H | -5.735483 | 8.566749  | 9.467363  |
| C | -3.263140 | 12.899206 | 9.917515  |
| H | -4.235623 | 12.461866 | 10.165498 |
| H | -3.054468 | 12.692567 | 8.863237  |
| H | -3.347822 | 13.987397 | 10.034438 |
| C | -2.185007 | 12.970886 | 12.761087 |
| H | -1.381724 | 12.718838 | 13.462468 |
| H | -3.111233 | 12.582391 | 13.197538 |

|   |           |           |           |
|---|-----------|-----------|-----------|
| H | -2.261414 | 14.064359 | 12.700901 |
| C | -0.271969 | 13.013234 | 10.375567 |
| H | -0.329166 | 14.108134 | 10.421212 |
| H | -0.117442 | 12.728602 | 9.328337  |
| H | 0.610896  | 12.699927 | 10.944420 |
| C | 1.236139  | 7.047688  | 15.162228 |
| C | 0.440046  | 5.758295  | 14.991885 |
| H | 0.674736  | 5.424262  | 13.971667 |
| C | 0.999661  | 4.708804  | 15.971182 |
| H | 0.798061  | 5.007478  | 17.006817 |
| H | 2.081469  | 4.583737  | 15.860714 |
| H | 0.518049  | 3.739439  | 15.802575 |
| C | -1.086748 | 5.800307  | 15.094937 |
| H | -1.483550 | 4.850514  | 14.718876 |
| H | -1.505845 | 6.606562  | 14.485999 |
| H | -1.430108 | 5.910967  | 16.128475 |
| C | 2.503438  | 7.073965  | 14.566255 |
| H | 2.797124  | 6.239143  | 13.934827 |
| C | 3.376229  | 8.134149  | 14.751797 |
| H | 4.348954  | 8.126660  | 14.267673 |
| C | 3.009241  | 9.204796  | 15.560035 |
| H | 1.696761  | 9.731237  | 13.585590 |
| H | 3.704809  | 10.024167 | 15.719910 |
| C | 1.753586  | 9.235906  | 16.171178 |
| C | 1.385842  | 10.409121 | 17.061899 |
| H | 0.408654  | 10.208995 | 17.511213 |
| C | 1.256437  | 11.711146 | 16.260436 |
| H | 2.186783  | 11.948066 | 15.729931 |
| H | 1.032513  | 12.546825 | 16.932647 |
| H | 0.436070  | 11.632241 | 15.537500 |
| C | 2.391151  | 10.561813 | 18.211815 |
| H | 3.384429  | 10.842708 | 17.845249 |
| H | 2.492131  | 9.628705  | 18.776032 |
| H | 2.057696  | 11.345373 | 18.900526 |
| C | 0.877634  | 8.158086  | 15.940606 |
| C | -4.637204 | 7.362181  | 16.235774 |
| H | -3.616344 | 7.248424  | 15.852396 |
| C | -5.589067 | 7.021125  | 15.085718 |
| H | -6.630086 | 6.956748  | 15.421925 |
| H | -5.321888 | 6.047461  | 14.662248 |
| H | -5.524304 | 7.766718  | 14.288636 |
| C | -4.829728 | 6.377966  | 17.399571 |
| H | -4.110955 | 6.556226  | 18.205459 |
| H | -4.700153 | 5.346602  | 17.052567 |
| H | -5.838311 | 6.474099  | 17.818476 |
| H | 1.407762  | 10.103929 | 12.002576 |
| H | 0.704317  | 10.994351 | 13.215223 |

Calculated energies and coordinates of **TS[A-B]**

|                         |     |                   |
|-------------------------|-----|-------------------|
| Electronic energy       | ... | -4057.25832664 Eh |
| Total Enthalpy          | ... | -4055.99342011 Eh |
| Final Gibbs free energy | ... | -4056.16719886 Eh |

CARTESIAN COORDINATES (ANGSTROM)

|    |           |           |           |
|----|-----------|-----------|-----------|
| Si | -0.144050 | 9.119059  | 9.456292  |
| Si | -1.455516 | 10.226803 | 11.095015 |

|    |           |           |           |   |           |           |           |
|----|-----------|-----------|-----------|---|-----------|-----------|-----------|
| Si | -0.773214 | 9.220743  | 13.185789 | H | -1.278193 | 11.425637 | 7.938466  |
| P  | -2.233062 | 10.024160 | 14.675684 | C | 1.609030  | 9.818249  | 9.535291  |
| Si | -3.773219 | 9.808650  | 10.798564 | C | 2.116601  | 10.661867 | 8.539987  |
| Si | -1.101506 | 12.578634 | 11.114495 | H | 1.526132  | 10.853786 | 7.646484  |
| N  | -2.862078 | 8.557147  | 16.962029 | C | 3.362120  | 11.269800 | 8.673879  |
| N  | -0.884876 | 7.999762  | 16.233397 | H | 3.725621  | 11.925791 | 7.885423  |
| N  | 0.801050  | 10.392835 | 13.504503 | C | 4.152603  | 11.057855 | 9.804900  |
| C  | -2.326367 | 9.859399  | 3.673379  | C | 5.506839  | 11.698350 | 9.937915  |
| H  | -1.903831 | 9.125285  | 2.981220  | H | 5.751920  | 11.897769 | 10.985400 |
| H  | -2.116378 | 10.860763 | 3.285358  | H | 5.557137  | 12.641480 | 9.386210  |
| H  | -3.415573 | 9.728291  | 3.668299  | H | 6.288644  | 11.040829 | 9.537820  |
| C  | -1.775944 | 9.683615  | 5.062219  | C | 3.662036  | 10.201287 | 10.795250 |
| C  | -1.317185 | 8.440770  | 5.503014  | H | 4.262806  | 10.003878 | 11.681695 |
| H  | -1.333011 | 7.593486  | 4.820472  | C | 2.418994  | 9.593146  | 10.659245 |
| C  | -0.840384 | 8.269641  | 6.799141  | H | 2.084061  | 8.911847  | 11.441368 |
| H  | -0.491505 | 7.287630  | 7.111186  | C | -4.777209 | 11.214628 | 11.563806 |
| C  | -0.807690 | 9.336683  | 7.705857  | H | -4.576926 | 12.179795 | 11.086902 |
| C  | -1.953058 | 8.817392  | 15.959075 | H | -4.561153 | 11.303443 | 12.634360 |
| C  | -4.062150 | 9.307794  | 17.195604 | H | -5.847933 | 11.001487 | 11.450200 |
| C  | -3.978315 | 10.443720 | 18.011220 | C | -4.336639 | 8.232804  | 11.673101 |
| C  | -2.660811 | 10.951988 | 18.565278 | H | -5.401463 | 8.064302  | 11.467145 |
| H  | -1.854616 | 10.322652 | 18.172524 | H | -4.212427 | 8.361135  | 12.753610 |
| C  | -2.624723 | 10.851664 | 20.096065 | H | -3.786546 | 7.335383  | 11.376434 |
| H  | -3.390214 | 11.488789 | 20.553027 | C | -4.226477 | 9.686096  | 8.967483  |
| H  | -1.648690 | 11.174055 | 20.475476 | H | -3.693375 | 8.875949  | 8.458231  |
| H  | -2.800350 | 9.823670  | 20.430327 | H | -3.989067 | 10.610171 | 8.429961  |
| C  | -6.373818 | 10.690723 | 17.771951 | H | -5.304007 | 9.502270  | 8.868545  |
| H  | -7.287684 | 11.230641 | 18.003764 | C | -1.851069 | 13.497000 | 9.631625  |
| C  | -6.421752 | 9.581180  | 16.935754 | H | -2.835435 | 13.110566 | 9.347894  |
| H  | -7.372859 | 9.274334  | 16.513337 | H | -1.198890 | 13.444876 | 8.753319  |
| C  | -5.265328 | 8.867892  | 16.623178 | H | -1.968566 | 14.557497 | 9.888742  |
| C  | -5.165007 | 11.122687 | 18.295927 | C | -1.884882 | 13.311508 | 12.672687 |
| H  | -5.138126 | 12.004776 | 18.929594 | H | -1.570183 | 12.795114 | 13.586992 |
| C  | -2.384740 | 12.385761 | 18.093197 | H | -2.977171 | 13.255107 | 12.642633 |
| H  | -2.402501 | 12.439106 | 16.999913 | H | -1.602157 | 14.368631 | 12.759418 |
| H  | -1.399047 | 12.714030 | 18.440807 | C | 0.736517  | 13.050694 | 11.149886 |
| H  | -3.128467 | 13.087191 | 18.487117 | H | 0.822286  | 14.128035 | 10.957450 |
| C  | -2.346879 | 7.623810  | 17.850074 | H | 1.321511  | 12.526704 | 10.387342 |
| H  | -2.899922 | 7.306479  | 18.719887 | H | 1.208951  | 12.868095 | 12.121388 |
| C  | -1.130445 | 7.260933  | 17.384277 | C | 0.337560  | 7.497199  | 14.135303 |
| H  | -0.412794 | 6.544818  | 17.752552 | C | -0.456907 | 6.215092  | 13.773267 |
| C  | -0.090870 | 7.267461  | 9.821006  | H | -0.307976 | 6.106233  | 12.690173 |
| C  | -1.294945 | 6.563906  | 9.960133  | C | 0.182125  | 5.002124  | 14.464569 |
| H  | -2.238775 | 7.094987  | 9.857432  | H | 0.089111  | 5.086093  | 15.554276 |
| C  | -1.315818 | 5.197513  | 10.210900 | H | 1.247580  | 4.921340  | 14.227048 |
| H  | -2.268907 | 4.682620  | 10.313695 | H | -0.320953 | 4.078583  | 14.155193 |
| C  | -0.125906 | 4.476210  | 10.341367 | C | -1.965811 | 6.208671  | 14.010978 |
| C  | 1.078701  | 5.164428  | 10.182775 | H | -2.413052 | 5.368192  | 13.467341 |
| H  | 2.018127  | 4.620909  | 10.262712 | H | -2.433301 | 7.127834  | 13.643475 |
| C  | 1.096405  | 6.532226  | 9.923847  | H | -2.219909 | 6.087313  | 15.070288 |
| H  | 2.053862  | 7.031695  | 9.793785  | C | 1.690887  | 7.439255  | 13.573115 |
| C  | -0.138917 | 3.009136  | 10.671247 | H | 1.796862  | 6.937716  | 12.613405 |
| H  | 0.682819  | 2.482010  | 10.176885 | C | 2.786713  | 7.974625  | 14.188879 |
| H  | -1.080593 | 2.540442  | 10.371349 | H | 3.755961  | 7.899825  | 13.698234 |
| H  | -0.021788 | 2.856099  | 11.751399 | C | 2.698086  | 8.604776  | 15.450491 |
| C  | -1.739131 | 10.754328 | 5.959607  | H | 1.405862  | 9.999276  | 14.236465 |
| H  | -2.092073 | 11.733307 | 5.640925  | H | 3.577606  | 9.038546  | 15.909701 |
| C  | -1.270702 | 10.579534 | 7.255611  | C | 1.468679  | 8.592333  | 16.123502 |

|   |           |           |           |
|---|-----------|-----------|-----------|
| C | 1.341154  | 9.325557  | 17.452623 |
| H | 0.479593  | 8.926434  | 17.997914 |
| C | 1.056213  | 10.814512 | 17.193465 |
| H | 1.897456  | 11.276113 | 16.661221 |
| H | 0.919396  | 11.352078 | 18.139525 |
| H | 0.148318  | 10.944166 | 16.590924 |
| C | 2.560692  | 9.154684  | 18.362878 |
| H | 3.442581  | 9.666427  | 17.964016 |
| H | 2.814665  | 8.097854  | 18.494064 |
| H | 2.352918  | 9.585531  | 19.348498 |
| C | 0.357974  | 7.990483  | 15.516403 |
| C | -5.299482 | 7.658975  | 15.708536 |
| H | -4.339049 | 7.629698  | 15.178877 |
| C | -6.403354 | 7.743991  | 14.651383 |
| H | -7.398982 | 7.619780  | 15.092309 |
| H | -6.269222 | 6.944377  | 13.916063 |
| H | -6.374322 | 8.700610  | 14.120249 |
| C | -5.440480 | 6.358905  | 16.515763 |
| H | -4.613225 | 6.226646  | 17.219012 |
| H | -5.450708 | 5.494338  | 15.842722 |
| H | -6.377113 | 6.361987  | 17.085605 |
| H | 1.370351  | 10.548780 | 12.671342 |
| H | 0.450266  | 11.290140 | 13.832336 |

|   |           |           |           |
|---|-----------|-----------|-----------|
| H | -1.756786 | 11.127347 | 20.610131 |
| H | -2.929252 | 9.796817  | 20.530048 |
| C | -6.434504 | 10.711041 | 17.828466 |
| H | -7.349681 | 11.247018 | 18.064136 |
| C | -6.475046 | 9.626422  | 16.959729 |
| H | -7.421814 | 9.334576  | 16.517550 |
| C | -5.317062 | 8.918909  | 16.640801 |
| C | -5.231593 | 11.122770 | 18.381022 |
| H | -5.209821 | 11.985291 | 19.041233 |
| C | -2.430259 | 12.370667 | 18.222833 |
| H | -2.431555 | 12.435794 | 17.130015 |
| H | -1.445356 | 12.682753 | 18.587247 |
| H | -3.171419 | 13.077449 | 18.612229 |
| C | -2.390723 | 7.651119  | 17.860722 |
| H | -2.940374 | 7.311778  | 18.724392 |
| C | -1.170477 | 7.310546  | 17.386194 |
| H | -0.450510 | 6.586628  | 17.733448 |
| C | 0.032872  | 7.210536  | 9.798533  |
| C | -1.162583 | 6.488272  | 9.916550  |
| C | -2.113904 | 7.003555  | 9.798740  |
| C | -1.164932 | 5.121920  | 10.169243 |
| H | -2.110818 | 4.590992  | 10.255160 |
| C | 0.034293  | 4.422117  | 10.326653 |
| C | 1.230218  | 5.130223  | 10.190402 |
| H | 2.176776  | 4.603908  | 10.294896 |
| C | 1.230298  | 6.496481  | 9.926204  |
| H | 2.181018  | 7.014403  | 9.819982  |
| C | 0.040074  | 2.957042  | 10.664395 |
| H | 0.877204  | 2.440521  | 10.185025 |
| H | -0.889512 | 2.471374  | 10.354169 |
| H | 0.144382  | 2.813469  | 11.747028 |
| C | -1.643477 | 10.800347 | 6.024941  |
| H | -1.900545 | 11.808582 | 5.705783  |
| C | -1.105545 | 10.594577 | 7.288207  |
| H | -0.957355 | 11.449450 | 7.943387  |
| C | 1.698882  | 9.802024  | 9.508717  |
| C | 2.205407  | 10.587585 | 8.466453  |
| H | 1.622229  | 10.718497 | 7.557766  |
| C | 3.444347  | 11.214836 | 8.571702  |
| H | 3.806894  | 11.824913 | 7.746847  |
| C | 4.229416  | 11.079070 | 9.717700  |
| C | 5.576407  | 11.739699 | 9.821314  |
| H | 5.800688  | 12.026558 | 10.853082 |
| H | 5.631331  | 12.634460 | 9.194669  |
| H | 6.369599  | 11.057174 | 9.491848  |
| C | 3.740987  | 10.277585 | 10.754044 |
| H | 4.337449  | 10.137892 | 11.654178 |
| C | 2.504431  | 9.652220  | 10.648286 |
| H | 2.171588  | 9.015241  | 11.467605 |
| C | -4.702300 | 11.134837 | 11.534778 |
| H | -4.480424 | 12.108612 | 11.086251 |
| H | -4.518452 | 11.197681 | 12.613213 |
| H | -5.770875 | 10.933942 | 11.384154 |
| C | -4.296362 | 8.148819  | 11.602845 |
| H | -5.342784 | 7.968302  | 11.325380 |
| H | -4.249966 | 8.275849  | 12.689074 |
| H | -3.715309 | 7.259416  | 11.343006 |
| C | -4.107043 | 9.639871  | 8.928780  |

Calculated energies and coordinates of **B**

|                         |     |                   |
|-------------------------|-----|-------------------|
| Electronic energy       | ... | -4057.25784946 Eh |
| Total Enthalpy          | ... | -4055.99211103 Eh |
| Final Gibbs free energy | ... | -4056.16687333 Eh |

CARTESIAN COORDINATES (ANGSTROEM)

|    |           |           |           |
|----|-----------|-----------|-----------|
| Si | -0.037509 | 9.062789  | 9.460539  |
| Si | -1.374912 | 10.120677 | 11.116259 |
| Si | -0.773453 | 9.303674  | 13.304887 |
| P  | -2.285449 | 10.102018 | 14.724401 |
| Si | -3.694415 | 9.731555  | 10.770581 |
| Si | -1.067441 | 12.485255 | 11.108760 |
| N  | -2.916330 | 8.597611  | 16.992181 |
| N  | -0.927153 | 8.080510  | 16.255155 |
| N  | 0.794264  | 10.448704 | 13.575155 |
| C  | -2.496816 | 9.940341  | 3.810562  |
| H  | -2.228898 | 9.140168  | 3.114696  |
| H  | -2.185992 | 10.894982 | 3.375321  |
| H  | -3.590946 | 9.957190  | 3.888767  |
| C  | -1.870764 | 9.725144  | 5.161029  |
| C  | -1.524671 | 8.446254  | 5.600050  |
| H  | -1.683946 | 7.594818  | 4.941615  |
| C  | -0.977901 | 8.243187  | 6.863834  |
| H  | -0.718742 | 7.233238  | 7.173253  |
| C  | -0.760456 | 9.313860  | 7.739239  |
| C  | -2.005169 | 8.887832  | 16.002201 |
| C  | -4.119564 | 9.338410  | 17.240579 |
| C  | -4.043241 | 10.448329 | 18.091823 |
| C  | -2.731991 | 10.936285 | 18.677874 |
| H  | -1.924384 | 10.300834 | 18.298872 |
| C  | -2.729768 | 10.824355 | 20.208027 |
| H  | -3.493853 | 11.470623 | 20.654257 |

|   |           |           |           |
|---|-----------|-----------|-----------|
| H | -3.592689 | 8.813789  | 8.426150  |
| H | -3.828448 | 10.556366 | 8.398693  |
| H | -5.188178 | 9.492944  | 8.809646  |
| C | -1.925891 | 13.345003 | 9.647826  |
| H | -2.832792 | 12.826872 | 9.321577  |
| H | -1.258911 | 13.434011 | 8.783950  |
| H | -2.208767 | 14.361880 | 9.947220  |
| C | -1.805240 | 13.235286 | 12.681266 |
| H | -1.402984 | 12.801354 | 13.603404 |
| H | -2.890030 | 13.099197 | 12.724116 |
| H | -1.597544 | 14.313194 | 12.693538 |
| C | 0.751691  | 13.017659 | 11.050184 |
| H | 0.787919  | 14.103656 | 10.893106 |
| H | 1.305721  | 12.541558 | 10.234813 |
| H | 1.294991  | 12.817323 | 11.980263 |
| C | 0.160582  | 7.665344  | 14.046165 |
| C | -0.610806 | 6.346997  | 13.729722 |
| H | -0.517482 | 6.238786  | 12.639536 |
| C | 0.086128  | 5.149164  | 14.382372 |
| H | 0.063636  | 5.239606  | 15.475351 |
| H | 1.135309  | 5.082508  | 14.078427 |
| H | -0.422392 | 4.217210  | 14.108855 |
| C | -2.105684 | 6.317416  | 14.047685 |
| H | -2.579162 | 5.483009  | 13.516725 |
| H | -2.601129 | 7.239305  | 13.728670 |
| H | -2.298122 | 6.175096  | 15.117346 |
| C | 1.533600  | 7.559996  | 13.449825 |
| H | 1.592369  | 7.066265  | 12.483035 |
| C | 2.661780  | 8.009748  | 14.061051 |
| H | 3.615159  | 7.891580  | 13.546361 |
| C | 2.643775  | 8.617602  | 15.344464 |
| H | 1.418287  | 10.058099 | 14.303328 |
| H | 3.559304  | 8.981136  | 15.791990 |
| C | 1.441990  | 8.594287  | 16.070662 |
| C | 1.388989  | 9.263354  | 17.439529 |
| H | 0.579223  | 8.813984  | 18.023514 |
| C | 1.043088  | 10.753104 | 17.268844 |
| H | 1.842010  | 11.266055 | 16.718597 |
| H | 0.937694  | 11.242625 | 18.244737 |
| H | 0.104084  | 10.882008 | 16.716431 |
| C | 2.670602  | 9.095361  | 18.259408 |
| H | 3.506352  | 9.655820  | 17.827950 |
| H | 2.967332  | 8.043625  | 18.323227 |
| H | 2.514975  | 9.474097  | 19.275753 |
| C | 0.285524  | 8.066723  | 15.490869 |
| C | -5.342849 | 7.735048  | 15.694021 |
| H | -4.376803 | 7.719479  | 15.175233 |
| C | -6.433412 | 7.848374  | 14.626181 |
| H | -7.435674 | 7.727025  | 15.052426 |
| H | -6.299078 | 7.059752  | 13.879021 |
| H | -6.388267 | 8.813834  | 14.111895 |
| C | -5.488622 | 6.413887  | 16.464919 |
| H | -4.666484 | 6.265838  | 17.171176 |
| H | -5.488662 | 5.568010  | 15.768462 |
| H | -6.430521 | 6.397841  | 17.025766 |
| H | 1.349445  | 10.572223 | 12.726884 |
| H | 0.469397  | 11.361545 | 13.887240 |

Calculated energies and coordinates of **TS[B-2]**

|                         |     |                   |
|-------------------------|-----|-------------------|
| Electronic energy       | ... | -4057.25284936 Eh |
| Total Enthalpy          | ... | -4055.99202728 Eh |
| Final Gibbs free energy | ... | -4056.16469054 Eh |

CARTESIAN COORDINATES (ANGSTROEM)

|    |           |           |           |
|----|-----------|-----------|-----------|
| Si | 0.000836  | 9.003656  | 9.479549  |
| Si | -1.329327 | 10.032833 | 11.169607 |
| Si | -0.602708 | 9.505913  | 13.406687 |
| P  | -2.249158 | 10.153861 | 14.768986 |
| Si | -3.660625 | 9.667213  | 10.836354 |
| Si | -1.121708 | 12.405737 | 11.006393 |
| N  | -2.950561 | 8.517744  | 16.931499 |
| N  | -0.947010 | 8.049582  | 16.212843 |
| N  | 0.846914  | 10.677243 | 13.704912 |
| C  | -2.632387 | 10.100343 | 3.947158  |
| H  | -3.662201 | 10.442043 | 4.108447  |
| H  | -2.674966 | 9.207503  | 3.317136  |
| H  | -2.111468 | 10.888156 | 3.393792  |
| C  | -1.956067 | 9.814988  | 5.259612  |
| C  | -1.836448 | 8.512614  | 5.744826  |
| H  | -2.211368 | 7.684077  | 5.147629  |
| C  | -1.242729 | 8.255871  | 6.977840  |
| H  | -1.159685 | 7.227038  | 7.320170  |
| C  | -0.750090 | 9.294384  | 7.775815  |
| C  | -2.017075 | 8.873822  | 15.986763 |
| C  | -4.146815 | 9.258289  | 17.213019 |
| C  | -4.062419 | 10.321926 | 18.121276 |
| C  | -2.751061 | 10.761180 | 18.744613 |
| H  | -1.948302 | 10.132135 | 18.345040 |
| C  | -2.767586 | 10.576312 | 20.267656 |
| H  | -3.526464 | 11.212284 | 20.736867 |
| H  | -1.794390 | 10.846407 | 20.692125 |
| H  | -2.984414 | 9.537776  | 20.539319 |
| C  | -6.447369 | 10.632463 | 17.851151 |
| H  | -7.356818 | 11.169484 | 18.105758 |
| C  | -6.495656 | 9.593411  | 16.929244 |
| H  | -7.442992 | 9.337334  | 16.466681 |
| C  | -5.344771 | 8.885988  | 16.584435 |
| C  | -5.243719 | 10.997788 | 18.434083 |
| H  | -5.215905 | 11.824962 | 19.137794 |
| C  | -2.422503 | 12.210945 | 18.362427 |
| H  | -2.394332 | 12.323459 | 17.273993 |
| H  | -1.444060 | 12.493286 | 18.765941 |
| H  | -3.165860 | 12.908007 | 18.764822 |
| C  | -2.445737 | 7.506768  | 17.742137 |
| H  | -3.013744 | 7.111521  | 18.569127 |
| C  | -1.210372 | 7.204095  | 17.278935 |
| H  | -0.485968 | 6.476841  | 17.609610 |
| C  | 0.081371  | 7.151328  | 9.815427  |
| C  | -1.099714 | 6.403100  | 9.911550  |
| H  | -2.057943 | 6.891067  | 9.745053  |
| C  | -1.080045 | 5.049826  | 10.227277 |
| H  | -2.015892 | 4.499637  | 10.301386 |
| C  | 0.127175  | 4.390617  | 10.471668 |
| C  | 1.310107  | 5.125402  | 10.363201 |

|   |           |           |           |
|---|-----------|-----------|-----------|
| H | 2.262781  | 4.633019  | 10.548118 |
| C | 1.289148  | 6.476899  | 10.034524 |
| H | 2.229140  | 7.019685  | 9.961931  |
| C | 0.157646  | 2.929074  | 10.824616 |
| H | -0.812777 | 2.589115  | 11.197236 |
| H | 0.911256  | 2.724193  | 11.591442 |
| H | 0.408958  | 2.320092  | 9.947467  |
| C | -1.441751 | 10.855959 | 6.039187  |
| H | -1.505110 | 11.879568 | 5.674758  |
| C | -0.854833 | 10.598122 | 7.270137  |
| H | -0.455431 | 11.430056 | 7.846823  |
| C | 1.740221  | 9.735762  | 9.492897  |
| C | 2.331463  | 10.300637 | 8.356381  |
| H | 1.802698  | 10.283420 | 7.406525  |
| C | 3.593868  | 10.885244 | 8.414743  |
| H | 4.025781  | 11.316280 | 7.513840  |
| C | 4.319024  | 10.923697 | 9.606715  |
| C | 5.665381  | 11.590036 | 9.677108  |
| H | 5.565805  | 12.633002 | 10.002466 |
| H | 6.158696  | 11.595904 | 8.700934  |
| H | 6.321874  | 11.086139 | 10.392972 |
| C | 3.748695  | 10.333008 | 10.738112 |
| H | 4.301216  | 10.318555 | 11.676223 |
| C | 2.486220  | 9.756402  | 10.679856 |
| H | 2.094589  | 9.274609  | 11.575206 |
| C | -4.664402 | 10.962616 | 11.778189 |
| H | -4.471750 | 11.987060 | 11.447972 |
| H | -4.457087 | 10.901633 | 12.852369 |
| H | -5.732411 | 10.759552 | 11.623905 |
| C | -4.318525 | 8.006561  | 11.450690 |
| H | -5.357675 | 7.899561  | 11.112986 |
| H | -4.319450 | 7.989737  | 12.544015 |
| H | -3.756057 | 7.137140  | 11.100791 |
| C | -4.066835 | 9.805671  | 8.995396  |
| H | -3.630532 | 8.984642  | 8.416793  |
| H | -3.698381 | 10.738405 | 8.557066  |
| H | -5.156103 | 9.773661  | 8.863921  |
| C | -2.220494 | 13.134798 | 9.645958  |
| H | -3.282919 | 12.984602 | 9.858783  |
| H | -2.022167 | 12.712854 | 8.657432  |
| H | -2.042087 | 14.216580 | 9.593835  |
| C | -1.676236 | 13.248841 | 12.609172 |
| H | -1.001767 | 13.069389 | 13.452487 |
| H | -2.671718 | 12.921657 | 12.924796 |
| H | -1.712233 | 14.333690 | 12.445306 |
| C | 0.649233  | 12.971933 | 10.648094 |
| H | 0.663124  | 14.065894 | 10.559397 |
| H | 1.044208  | 12.549567 | 9.718282  |
| H | 1.353514  | 12.699889 | 11.441737 |
| C | 0.244293  | 7.861152  | 14.018399 |
| C | -0.470105 | 6.536762  | 13.615237 |
| H | -0.286498 | 6.457145  | 12.535285 |
| C | 0.186091  | 5.325391  | 14.284154 |
| H | 0.026884  | 5.346149  | 15.369136 |
| H | 1.265721  | 5.302206  | 14.108648 |
| H | -0.251231 | 4.397405  | 13.897247 |
| C | -1.987139 | 6.477602  | 13.798759 |
| H | -2.395784 | 5.656173  | 13.198327 |

|   |           |           |           |
|---|-----------|-----------|-----------|
| H | -2.469418 | 7.403134  | 13.471188 |
| H | -2.274043 | 6.295864  | 14.841032 |
| C | 1.674139  | 7.783411  | 13.513039 |
| H | 1.836330  | 7.180917  | 12.623402 |
| C | 2.699289  | 8.388819  | 14.140713 |
| H | 3.704134  | 8.304911  | 13.728492 |
| C | 2.482264  | 9.215673  | 15.312464 |
| H | 1.664866  | 10.239143 | 14.493018 |
| H | 3.360904  | 9.570763  | 15.845508 |
| C | 1.321907  | 8.868076  | 16.099309 |
| C | 1.227098  | 9.409676  | 17.512973 |
| H | 0.278136  | 9.084636  | 17.952857 |
| C | 1.213513  | 10.945685 | 17.499953 |
| H | 2.152634  | 11.347639 | 17.105148 |
| H | 1.079878  | 11.331806 | 18.517463 |
| H | 0.388016  | 11.318753 | 16.882182 |
| C | 2.349665  | 8.871469  | 18.409140 |
| H | 3.331345  | 9.224088  | 18.077459 |
| H | 2.367641  | 7.776471  | 18.399307 |
| H | 2.203925  | 9.205312  | 19.442833 |
| C | 0.293534  | 8.187426  | 15.509774 |
| C | -5.384663 | 7.743628  | 15.588201 |
| H | -4.402343 | 7.702867  | 15.101099 |
| C | -6.433694 | 7.946164  | 14.492192 |
| H | -7.453547 | 7.879659  | 14.886904 |
| H | -6.329492 | 7.164098  | 13.733598 |
| H | -6.313489 | 8.916407  | 13.999223 |
| C | -5.618946 | 6.403976  | 16.304149 |
| H | -4.842898 | 6.200220  | 17.047833 |
| H | -5.616438 | 5.581353  | 15.580474 |
| H | -6.588391 | 6.408190  | 16.816222 |
| H | 1.365401  | 10.884289 | 12.851583 |
| H | 0.492403  | 11.559030 | 14.069284 |

#### Calculated energies and coordinates of 2

|                         |     |                   |
|-------------------------|-----|-------------------|
| Electronic energy       | ... | -4057.29904654 Eh |
| Total Enthalpy          | ... | -4056.03316380 Eh |
| Final Gibbs free energy | ... | -4056.20766428 Eh |

#### CARTESIAN COORDINATES (ANGSTROEM)

|    |           |           |           |
|----|-----------|-----------|-----------|
| Si | 0.023032  | 9.015486  | 9.522998  |
| Si | -1.373038 | 9.970634  | 11.207997 |
| Si | -0.608879 | 9.718950  | 13.470897 |
| P  | -2.288236 | 10.296510 | 14.844037 |
| Si | -3.673914 | 9.474351  | 10.820846 |
| Si | -1.313135 | 12.346326 | 10.943594 |
| N  | -2.984489 | 8.642385  | 16.977173 |
| N  | -1.006685 | 8.127333  | 16.221141 |
| N  | 0.693967  | 10.859552 | 13.746070 |
| C  | -2.550328 | 10.083375 | 3.953400  |
| H  | -3.591747 | 10.395947 | 4.099062  |
| H  | -2.558445 | 9.194843  | 3.315777  |
| H  | -2.041114 | 10.889244 | 3.415590  |
| C  | -1.890049 | 9.804751  | 5.275480  |
| C  | -1.779150 | 8.504867  | 5.769406  |
| H  | -2.147145 | 7.673430  | 5.171823  |

|   |           |           |           |   |           |           |           |
|---|-----------|-----------|-----------|---|-----------|-----------|-----------|
| C | -1.202432 | 8.254458  | 7.011511  | H | 2.022958  | 9.655622  | 11.660061 |
| H | -1.124362 | 7.226873  | 7.358705  | C | -4.751797 | 10.716404 | 11.752977 |
| C | -0.717733 | 9.295951  | 7.810387  | H | -4.613141 | 11.746684 | 11.413983 |
| C | -2.057700 | 8.991354  | 16.016507 | H | -4.538091 | 10.679212 | 12.827288 |
| C | -4.155830 | 9.411044  | 17.282561 | H | -5.807209 | 10.453927 | 11.601610 |
| C | -4.029738 | 10.467311 | 18.194450 | C | -4.305459 | 7.775717  | 11.368457 |
| C | -2.697597 | 10.862981 | 18.803002 | H | -5.282890 | 7.608836  | 10.897187 |
| H | -1.917559 | 10.224207 | 18.374214 | H | -4.448065 | 7.747717  | 12.451840 |
| C | -2.693148 | 10.644111 | 20.321835 | H | -3.652196 | 6.942474  | 11.096920 |
| H | -3.432217 | 11.284038 | 20.816650 | C | -4.039796 | 9.610834  | 8.970802  |
| H | -1.708418 | 10.886183 | 20.736655 | H | -3.612116 | 8.771136  | 8.413093  |
| H | -2.926444 | 9.604284  | 20.574503 | H | -3.644694 | 10.527356 | 8.523407  |
| C | -6.408788 | 10.843998 | 17.958550 | H | -5.127222 | 9.597679  | 8.821305  |
| H | -7.299461 | 11.404650 | 18.228171 | C | -2.448937 | 12.973557 | 9.560171  |
| C | -6.498289 | 9.811744  | 17.032282 | H | -3.503214 | 12.778037 | 9.777163  |
| H | -7.458388 | 9.583896  | 16.580932 | H | -2.228043 | 12.536565 | 8.582849  |
| C | -5.371604 | 9.075739  | 16.667879 | H | -2.324350 | 14.061207 | 9.479217  |
| C | -5.187594 | 11.173211 | 18.527085 | C | -1.907243 | 13.206355 | 12.519678 |
| H | -5.128121 | 11.995946 | 19.234079 | H | -1.212574 | 13.061530 | 13.352032 |
| C | -2.340144 | 12.312333 | 18.447523 | H | -2.887223 | 12.845768 | 12.847717 |
| H | -2.329827 | 12.448668 | 17.361576 | H | -1.989284 | 14.284458 | 12.329972 |
| H | -1.347341 | 12.560964 | 18.838254 | C | 0.422167  | 13.000697 | 10.562300 |
| H | -3.057215 | 13.018369 | 18.880570 | H | 0.372721  | 14.091791 | 10.452905 |
| C | -2.502465 | 7.599420  | 17.757920 | H | 0.845238  | 12.585690 | 9.641675  |
| H | -3.074853 | 7.196339  | 18.578014 | H | 1.131012  | 12.779520 | 11.366268 |
| C | -1.284772 | 7.267096  | 17.275208 | C | 0.129761  | 7.964660  | 14.024928 |
| H | -0.589083 | 6.498624  | 17.572873 | C | -0.658250 | 6.698905  | 13.567024 |
| C | 0.198033  | 7.157742  | 9.802654  | H | -0.562257 | 6.704210  | 12.472701 |
| C | -0.936677 | 6.340435  | 9.894059  | C | 0.010770  | 5.420427  | 14.083691 |
| H | -1.924520 | 6.779275  | 9.768782  | H | -0.037207 | 5.374083  | 15.179353 |
| C | -0.833533 | 4.978083  | 10.150531 | H | 1.063565  | 5.364078  | 13.790508 |
| H | -1.734906 | 4.371989  | 10.216561 | H | -0.506176 | 4.537907  | 13.689321 |
| C | 0.414472  | 4.378746  | 10.337417 | C | -2.156280 | 6.653867  | 13.871217 |
| C | 1.551761  | 5.182047  | 10.228013 | H | -2.628241 | 5.888299  | 13.244870 |
| H | 2.535342  | 4.734438  | 10.356447 | H | -2.637830 | 7.610998  | 13.656001 |
| C | 1.446586  | 6.543225  | 9.960879  | H | -2.359453 | 6.390886  | 14.915185 |
| H | 2.352591  | 7.140813  | 9.881162  | C | 1.494265  | 7.883460  | 13.418111 |
| C | 0.533734  | 2.917960  | 10.674048 | H | 1.526293  | 7.523267  | 12.391507 |
| H | 1.390488  | 2.461797  | 10.168356 | C | 2.625658  | 8.189225  | 14.046766 |
| H | -0.367580 | 2.367419  | 10.390221 | H | 3.575739  | 8.098413  | 13.522112 |
| H | 0.681042  | 2.781213  | 11.752645 | C | 2.665119  | 8.666723  | 15.460789 |
| C | -1.381818 | 10.848392 | 6.055080  | H | 3.030808  | 9.706751  | 15.493734 |
| H | -1.436493 | 11.869962 | 5.683644  | H | 3.410867  | 8.085649  | 16.026553 |
| C | -0.809554 | 10.596523 | 7.294484  | C | 1.336585  | 8.596595  | 16.164416 |
| H | -0.410907 | 11.430522 | 7.868468  | C | 1.295547  | 9.144140  | 17.580306 |
| C | 1.741885  | 9.800826  | 9.524431  | H | 0.404761  | 8.761191  | 18.088499 |
| C | 2.367590  | 10.208224 | 8.339455  | C | 1.149144  | 10.675952 | 17.523701 |
| H | 1.862537  | 10.068262 | 7.386882  | H | 2.005125  | 11.139242 | 17.020768 |
| C | 3.630866  | 10.793556 | 8.353312  | H | 1.090709  | 11.087557 | 18.538552 |
| H | 4.088580  | 11.101142 | 7.415335  | H | 0.242085  | 10.955972 | 16.976990 |
| C | 4.322366  | 10.990108 | 9.549380  | C | 2.508953  | 8.741175  | 18.424691 |
| C | 5.670099  | 11.657340 | 9.570069  | H | 3.431242  | 9.201538  | 18.054502 |
| H | 5.572849  | 12.720936 | 9.820543  | H | 2.650399  | 7.654578  | 18.433102 |
| H | 6.163056  | 11.591534 | 8.596013  | H | 2.369512  | 9.072769  | 19.458986 |
| H | 6.326405  | 11.205105 | 10.320221 | C | 0.236822  | 8.184698  | 15.507934 |
| C | 3.714647  | 10.564290 | 10.733827 | C | -5.456304 | 7.940013  | 15.667309 |
| H | 4.236133  | 10.687486 | 11.681575 | H | -4.473218 | 7.853706  | 15.189389 |
| C | 2.451560  | 9.987285  | 10.718437 | C | -6.483070 | 8.194669  | 14.560942 |

|   |           |           |           |
|---|-----------|-----------|-----------|
| H | -7.509100 | 8.181610  | 14.944867 |
| H | -6.413288 | 7.405957  | 13.804955 |
| H | -6.307991 | 9.156185  | 14.068164 |
| C | -5.759545 | 6.611981  | 16.379136 |
| H | -5.002600 | 6.375716  | 17.133057 |
| H | -5.783981 | 5.789448  | 15.655712 |
| H | -6.733964 | 6.659018  | 16.879429 |
| H | 1.267952  | 11.174306 | 12.976502 |
| H | 0.459685  | 11.634772 | 14.350064 |

|   |           |           |           |
|---|-----------|-----------|-----------|
| C | -0.941739 | 7.474139  | 17.538626 |
| H | -0.148773 | 6.831146  | 17.886519 |
| C | 0.149816  | 7.261950  | 9.720507  |
| C | -0.899261 | 6.394194  | 10.055296 |
| H | -1.904959 | 6.786210  | 10.181880 |
| C | -0.679391 | 5.034770  | 10.251023 |
| H | -1.515193 | 4.387239  | 10.509557 |
| C | 0.601935  | 4.490317  | 10.136530 |
| C | 1.650814  | 5.347232  | 9.793310  |
| H | 2.656908  | 4.945495  | 9.691369  |
| C | 1.428507  | 6.704970  | 9.585353  |
| H | 2.269164  | 7.347259  | 9.330910  |
| C | 0.848847  | 3.032533  | 10.412665 |
| H | 1.726611  | 2.666745  | 9.872058  |
| H | -0.012553 | 2.421382  | 10.126789 |
| H | 1.028082  | 2.866544  | 11.482601 |
| C | -1.426441 | 10.951543 | 5.992235  |
| H | -1.416005 | 11.961621 | 5.587171  |
| C | -0.861530 | 10.704853 | 7.236612  |
| H | -0.415578 | 11.531483 | 7.785639  |
| C | 1.544968  | 9.976692  | 9.587680  |
| C | 2.296130  | 10.243566 | 8.435689  |
| H | 1.893189  | 9.986005  | 7.458514  |
| C | 3.553028  | 10.836134 | 8.516027  |
| H | 4.113970  | 11.032311 | 7.604562  |
| C | 4.107268  | 11.183438 | 9.749637  |
| C | 5.448771  | 11.858511 | 9.836451  |
| H | 5.331696  | 12.946127 | 9.920474  |
| H | 6.053467  | 11.660051 | 8.947053  |
| H | 6.007205  | 11.522480 | 10.715683 |
| C | 3.366565  | 10.911418 | 10.903096 |
| H | 3.777944  | 11.169129 | 11.877736 |
| C | 2.110312  | 10.323499 | 10.821102 |
| H | 1.558577  | 10.124912 | 11.737259 |
| C | -5.040726 | 10.183076 | 11.760135 |
| H | -4.882126 | 11.140209 | 12.265081 |
| H | -4.987484 | 9.401124  | 12.524628 |
| H | -6.054404 | 10.181875 | 11.339092 |
| C | -4.225580 | 8.175123  | 9.651579  |
| H | -5.260542 | 8.198925  | 9.286952  |
| H | -4.159360 | 7.383965  | 10.407061 |
| H | -3.581930 | 7.911989  | 8.806034  |
| C | -4.041603 | 11.154651 | 9.023609  |
| H | -3.411792 | 10.940956 | 8.154075  |
| H | -3.808143 | 12.167515 | 9.368207  |
| H | -5.089697 | 11.144769 | 8.698072  |
| C | -0.532017 | 13.194103 | 10.202617 |
| H | -1.293001 | 13.183416 | 9.414654  |
| H | 0.398398  | 12.786517 | 9.791257  |
| H | -0.348360 | 14.240451 | 10.478542 |
| C | -2.653617 | 13.038562 | 12.403546 |
| H | -3.011734 | 12.521130 | 13.300401 |
| H | -3.464997 | 13.050469 | 11.668787 |
| H | -2.431823 | 14.078127 | 12.676711 |
| C | 0.239820  | 12.368429 | 13.058553 |
| H | 0.156723  | 13.339524 | 13.562460 |
| H | 1.246874  | 12.289010 | 12.637893 |
| H | 0.113326  | 11.584918 | 13.811744 |

Calculated energies and coordinates of **TS[1-C]**

|                         |     |                   |
|-------------------------|-----|-------------------|
| Electronic energy       | ... | -4000.69175512 Eh |
| Total Enthalpy          | ... | -3999.46776129 Eh |
| Final Gibbs free energy | ... | -3999.63938528 Eh |

CARTESIAN COORDINATES (ANGSTROM)

|    |           |           |           |
|----|-----------|-----------|-----------|
| Si | -0.132206 | 9.116613  | 9.511298  |
| Si | -1.559287 | 9.947832  | 11.212405 |
| Si | -1.761486 | 8.459467  | 13.075547 |
| P  | -2.508318 | 9.784968  | 14.671364 |
| Si | -3.789884 | 9.864307  | 10.380893 |
| Si | -1.089802 | 12.220102 | 11.725122 |
| N  | -2.781675 | 8.647831  | 17.231135 |
| N  | -0.953928 | 7.979989  | 16.246087 |
| C  | -2.665963 | 10.201038 | 3.926327  |
| H  | -3.671550 | 10.616581 | 4.066424  |
| H  | -2.765272 | 9.289656  | 3.329991  |
| H  | -2.090663 | 10.930590 | 3.347608  |
| C  | -2.016377 | 9.920992  | 5.253724  |
| C  | -2.000386 | 8.634866  | 5.794354  |
| H  | -2.438249 | 7.813034  | 5.231604  |
| C  | -1.424823 | 8.386510  | 7.037551  |
| H  | -1.412457 | 7.368186  | 7.420941  |
| C  | -0.851616 | 9.416543  | 7.792155  |
| C  | -2.096223 | 8.728378  | 16.043530 |
| C  | -4.016982 | 9.326267  | 17.493719 |
| C  | -3.957607 | 10.626872 | 18.013698 |
| C  | -2.642977 | 11.330724 | 18.292308 |
| H  | -1.826100 | 10.681008 | 17.958795 |
| C  | -2.459286 | 11.570354 | 19.797541 |
| H  | -3.229634 | 12.245395 | 20.186563 |
| H  | -1.482340 | 12.025199 | 19.994623 |
| H  | -2.521794 | 10.632099 | 20.359063 |
| C  | -6.379030 | 10.640707 | 18.014679 |
| H  | -7.311311 | 11.159375 | 18.219526 |
| C  | -6.405180 | 9.356128  | 17.488901 |
| H  | -7.359623 | 8.880225  | 17.282805 |
| C  | -5.222258 | 8.668431  | 17.215745 |
| C  | -5.168532 | 11.268983 | 18.274004 |
| H  | -5.162873 | 12.277635 | 18.677305 |
| C  | -2.530259 | 12.641111 | 17.502487 |
| H  | -2.661868 | 12.458719 | 16.431340 |
| H  | -1.542143 | 13.088582 | 17.656670 |
| H  | -3.281779 | 13.369498 | 17.826609 |
| C  | -2.074859 | 7.894938  | 18.150440 |
| H  | -2.457720 | 7.706871  | 19.141321 |

|   |           |           |           |   |           |           |           |
|---|-----------|-----------|-----------|---|-----------|-----------|-----------|
| C | -0.176790 | 7.149985  | 14.064229 | H | -3.420144 | 9.139612  | 3.649771  |
| C | -0.854688 | 5.757635  | 14.111044 | H | -2.436778 | 10.598466 | 3.420658  |
| H | -1.011214 | 5.499832  | 13.054707 | C | -2.372273 | 9.790641  | 5.420795  |
| C | 0.137842  | 4.747107  | 14.707716 | C | -2.547321 | 8.584903  | 6.100357  |
| H | 0.349166  | 4.984259  | 15.757385 | H | -3.186873 | 7.816921  | 5.670354  |
| H | 1.088376  | 4.758344  | 14.164369 | C | -1.906836 | 8.345755  | 7.313629  |
| H | -0.277576 | 3.733776  | 14.668204 | H | -2.047734 | 7.385452  | 7.805426  |
| C | -2.207684 | 5.643118  | 14.811367 | C | -1.074800 | 9.307098  | 7.896865  |
| H | -2.657154 | 4.673413  | 14.569906 | C | -2.124846 | 8.773864  | 16.033054 |
| H | -2.896407 | 6.425142  | 14.470556 | C | -4.229626 | 8.751512  | 17.342412 |
| H | -2.115339 | 5.696843  | 15.901157 | C | -4.493769 | 9.938263  | 18.041011 |
| C | 0.892407  | 7.225948  | 13.096920 | C | -3.387768 | 10.850310 | 18.537975 |
| H | 0.771259  | 6.670118  | 12.172954 | H | -2.424713 | 10.420028 | 18.240974 |
| C | 2.040191  | 7.944581  | 13.315168 | C | -3.398741 | 10.952343 | 20.069038 |
| H | 2.801019  | 7.972451  | 12.539415 | H | -4.322492 | 11.419699 | 20.427724 |
| C | 2.246978  | 8.626034  | 14.520658 | H | -2.557944 | 11.563202 | 20.415268 |
| H | 3.158046  | 9.195598  | 14.667237 | H | -3.320735 | 9.963849  | 20.534089 |
| C | 1.270821  | 8.606137  | 15.519036 | C | -6.853583 | 9.460883  | 17.782383 |
| C | 1.459285  | 9.451955  | 16.769960 | H | -7.888989 | 9.739466  | 17.957071 |
| H | 0.808190  | 9.063795  | 17.560135 | C | -6.560408 | 8.300825  | 17.077825 |
| C | 1.023196  | 10.899821 | 16.500512 | H | -7.370355 | 7.682017  | 16.701889 |
| H | 1.660452  | 11.357945 | 15.735928 | C | -5.239441 | 7.920155  | 16.839672 |
| H | 1.098640  | 11.497722 | 17.416786 | C | -5.831432 | 10.271654 | 18.256950 |
| H | -0.010401 | 10.941277 | 16.138135 | H | -6.075489 | 11.183195 | 18.795247 |
| C | 2.890940  | 9.402960  | 17.314519 | C | -3.481142 | 12.236711 | 17.886456 |
| H | 3.598592  | 9.909683  | 16.650302 | H | -3.468146 | 12.151261 | 16.795477 |
| H | 3.233684  | 8.371996  | 17.451223 | H | -2.630290 | 12.854705 | 18.193950 |
| H | 2.935477  | 9.912811  | 18.282780 | H | -4.399267 | 12.756177 | 18.182629 |
| C | 0.100123  | 7.873248  | 15.290242 | C | -2.063799 | 7.701537  | 18.023614 |
| C | -5.265922 | 7.277366  | 16.616261 | H | -2.460046 | 7.309832  | 18.947414 |
| H | -4.240896 | 6.896115  | 16.560767 | C | -0.824216 | 7.622074  | 17.482546 |
| C | -5.813872 | 7.324386  | 15.182943 | H | 0.066325  | 7.123983  | 17.830953 |
| H | -6.854095 | 7.668994  | 15.170126 | C | -0.257428 | 7.203370  | 9.980346  |
| H | -5.780848 | 6.327085  | 14.730109 | C | -1.447487 | 6.595179  | 10.407421 |
| H | -5.218551 | 8.005950  | 14.567471 | H | -2.355385 | 7.185967  | 10.495224 |
| C | -6.072126 | 6.307913  | 17.490064 | C | -1.497322 | 5.242041  | 10.723805 |
| H | -5.687409 | 6.281535  | 18.515058 | H | -2.437465 | 4.800996  | 11.049068 |
| H | -6.018381 | 5.295357  | 17.075920 | C | -0.351535 | 4.446851  | 10.654095 |
| H | -7.129132 | 6.591870  | 17.534847 | C | 0.839435  | 5.045930  | 10.237172 |

Calculated energies and coordinates of C

Electronic energy       ... -4000.69366596 Eh  
 Total Enthalpy        ... -3999.46913916 Eh  
 Final Gibbs free energy   ... -3999.64150517 Eh

CARTESIAN COORDINATES (ANGSTROEM)

|    |           |           |           |
|----|-----------|-----------|-----------|
| Si | -0.197257 | 9.041171  | 9.546922  |
| Si | -1.237618 | 10.283708 | 11.291145 |
| Si | -1.392632 | 8.918484  | 13.206173 |
| P  | -2.691110 | 9.825262  | 14.720996 |
| Si | -3.522186 | 10.607566 | 10.666333 |
| Si | -0.323994 | 12.438385 | 11.702280 |
| N  | -2.860909 | 8.387651  | 17.127618 |
| N  | -0.857544 | 8.278954  | 16.257296 |
| C  | -3.083934 | 10.065627 | 4.124522  |
| H  | -3.968297 | 10.692628 | 4.292316  |

|   |           |           |           |
|---|-----------|-----------|-----------|
| H | -3.420144 | 9.139612  | 3.649771  |
| H | -2.436778 | 10.598466 | 3.420658  |
| C | -2.372273 | 9.790641  | 5.420795  |
| C | -2.547321 | 8.584903  | 6.100357  |
| H | -3.186873 | 7.816921  | 5.670354  |
| C | -1.906836 | 8.345755  | 7.313629  |
| H | -2.047734 | 7.385452  | 7.805426  |
| C | -1.074800 | 9.307098  | 7.896865  |
| C | -2.124846 | 8.773864  | 16.033054 |
| C | -4.229626 | 8.751512  | 17.342412 |
| C | -4.493769 | 9.938263  | 18.041011 |
| C | -3.387768 | 10.850310 | 18.537975 |
| H | -2.424713 | 10.420028 | 18.240974 |
| C | -3.398741 | 10.952343 | 20.069038 |
| H | -4.322492 | 11.419699 | 20.427724 |
| H | -2.557944 | 11.563202 | 20.415268 |
| H | -3.320735 | 9.963849  | 20.534089 |
| C | -6.853583 | 9.460883  | 17.782383 |
| H | -7.888989 | 9.739466  | 17.957071 |
| C | -6.560408 | 8.300825  | 17.077825 |
| H | -7.370355 | 7.682017  | 16.701889 |
| C | -5.239441 | 7.920155  | 16.839672 |
| C | -5.831432 | 10.271654 | 18.256950 |
| H | -6.075489 | 11.183195 | 18.795247 |
| C | -3.481142 | 12.236711 | 17.886456 |
| H | -3.468146 | 12.151261 | 16.795477 |
| H | -2.630290 | 12.854705 | 18.193950 |
| H | -4.399267 | 12.756177 | 18.182629 |
| C | -2.063799 | 7.701537  | 18.023614 |
| H | -2.460046 | 7.309832  | 18.947414 |
| C | -0.824216 | 7.622074  | 17.482546 |
| H | 0.066325  | 7.123983  | 17.830953 |
| C | -0.257428 | 7.203370  | 9.980346  |
| C | -1.447487 | 6.595179  | 10.407421 |
| H | -2.355385 | 7.185967  | 10.495224 |
| C | -1.497322 | 5.242041  | 10.723805 |
| H | -2.437465 | 4.800996  | 11.049068 |
| C | -0.351535 | 4.446851  | 10.654095 |
| C | 0.839435  | 5.045930  | 10.237172 |
| H | 1.745638  | 4.446901  | 10.174876 |
| C | 0.884423  | 6.395592  | 9.901007  |
| H | 1.828645  | 6.830591  | 9.579632  |
| C | -0.388780 | 3.000143  | 11.063133 |
| H | 0.357328  | 2.411905  | 10.520820 |
| H | -1.374052 | 2.559898  | 10.883252 |
| H | -0.172738 | 2.896098  | 12.134250 |
| C | -1.525542 | 10.748446 | 5.988009  |
| H | -1.363346 | 11.692130 | 5.470809  |
| C | -0.893901 | 10.512563 | 7.201738  |
| H | -0.240380 | 11.279592 | 7.614440  |
| C | 1.597285  | 9.542094  | 9.257805  |
| C | 2.213481  | 9.313962  | 8.019256  |
| H | 1.641075  | 8.873304  | 7.205391  |
| C | 3.547138  | 9.646686  | 7.807075  |
| H | 4.000519  | 9.455668  | 6.836590  |
| C | 4.314653  | 10.227662 | 8.819864  |
| C | 5.744579  | 10.626021 | 8.576830  |
| H | 5.807200  | 11.675011 | 8.261774  |



|   |           |           |           |
|---|-----------|-----------|-----------|
| H | 6.199081  | 10.018765 | 7.788728  |
| H | 6.346753  | 10.521122 | 9.484355  |
| C | 3.706262  | 10.455959 | 10.056256 |
| H | 4.282749  | 10.908527 | 10.861393 |
| C | 2.374451  | 10.117931 | 10.266924 |
| H | 1.924617  | 10.299927 | 11.238558 |
| C | -4.606916 | 11.293255 | 12.052345 |
| H | -4.193302 | 12.184730 | 12.530281 |
| H | -4.779144 | 10.548021 | 12.834933 |
| H | -5.579448 | 11.562473 | 11.619366 |
| C | -4.357871 | 9.004611  | 10.113875 |
| H | -5.400168 | 9.224359  | 9.849299  |
| H | -4.373004 | 8.264316  | 10.922097 |
| H | -3.878406 | 8.562545  | 9.235047  |
| C | -3.591785 | 11.833346 | 9.229312  |
| H | -3.089174 | 11.443112 | 8.339319  |
| H | -3.128684 | 12.791797 | 9.488018  |
| H | -4.640309 | 12.029020 | 8.970820  |
| C | 0.277258  | 13.240088 | 10.099482 |
| H | -0.530736 | 13.314484 | 9.363162  |
| H | 1.093219  | 12.661846 | 9.652084  |
| H | 0.647994  | 14.253860 | 10.297047 |
| C | -1.666698 | 13.530367 | 12.459698 |
| H | -2.050127 | 13.092775 | 13.388492 |
| H | -2.510361 | 13.686491 | 11.780468 |
| H | -1.241667 | 14.513091 | 12.700229 |
| C | 1.083553  | 12.391767 | 12.960701 |
| H | 1.245831  | 13.402754 | 13.356107 |
| H | 2.029095  | 12.046638 | 12.532471 |
| H | 0.837986  | 11.732380 | 13.799793 |
| C | 0.145014  | 7.893944  | 14.025073 |
| C | -0.067811 | 6.354913  | 13.929571 |
| H | 0.005555  | 6.136940  | 12.855200 |
| C | 1.077268  | 5.627917  | 14.641304 |
| H | 1.036438  | 5.801951  | 15.723416 |
| H | 2.049743  | 5.979586  | 14.281150 |
| H | 1.013710  | 4.546982  | 14.472584 |
| C | -1.424392 | 5.837249  | 14.400069 |
| H | -1.562074 | 4.801206  | 14.069209 |
| H | -2.240155 | 6.434787  | 13.970668 |
| H | -1.515570 | 5.849889  | 15.491964 |
| C | 1.272811  | 8.338390  | 13.174954 |
| H | 1.285524  | 7.968990  | 12.152540 |
| C | 2.320394  | 9.079832  | 13.647490 |
| H | 3.138278  | 9.317770  | 12.970985 |
| C | 2.365326  | 9.548646  | 14.968620 |
| H | 3.186773  | 10.178506 | 15.287348 |
| C | 1.295990  | 9.292552  | 15.832159 |
| C | 1.212364  | 10.032941 | 17.161270 |
| H | 0.617878  | 9.443249  | 17.866643 |
| C | 0.468538  | 11.362858 | 16.949397 |
| H | 1.047813  | 12.021094 | 16.292015 |
| H | 0.320049  | 11.876728 | 17.906927 |
| H | -0.510294 | 11.204808 | 16.480893 |
| C | 2.572929  | 10.267467 | 17.822275 |
| H | 3.179832  | 10.987779 | 17.264138 |
| H | 3.144076  | 9.337274  | 17.909885 |
| H | 2.429201  | 10.678266 | 18.827380 |

|   |           |          |           |
|---|-----------|----------|-----------|
| C | 0.248947  | 8.485904 | 15.387518 |
| C | -4.934205 | 6.663512 | 16.049904 |
| H | -3.847126 | 6.541103 | 16.010187 |
| C | -5.431793 | 6.792717 | 14.603455 |
| H | -6.524119 | 6.874327 | 14.565610 |
| H | -5.139289 | 5.909893 | 14.023775 |
| H | -5.001003 | 7.678888 | 14.126481 |
| C | -5.516408 | 5.417275 | 16.729607 |
| H | -5.156431 | 5.320878 | 17.759436 |
| H | -5.225388 | 4.516732 | 16.178066 |
| H | -6.611008 | 5.451995 | 16.758155 |

#### Calculated energies and coordinates of TS[C-D]

|                         |     |                   |
|-------------------------|-----|-------------------|
| Electronic energy       | ... | -4000.69037875 Eh |
| Total Enthalpy          | ... | -3999.46667292 Eh |
| Final Gibbs free energy | ... | -3999.63700435 Eh |

#### CARTESIAN COORDINATES (ANGSTROM)

|    |           |           |           |
|----|-----------|-----------|-----------|
| Si | -0.125339 | 9.110677  | 9.658202  |
| Si | -0.972391 | 10.512964 | 11.394830 |
| Si | -1.193056 | 9.152979  | 13.289116 |
| P  | -3.011686 | 9.403166  | 14.497760 |
| Si | -3.243644 | 11.067330 | 10.872198 |
| Si | 0.204736  | 12.568671 | 11.617747 |
| N  | -2.937689 | 8.143101  | 17.008772 |
| N  | -0.938420 | 8.452555  | 16.156615 |
| C  | -3.293304 | 10.437410 | 4.465102  |
| H  | -4.032206 | 11.214889 | 4.695286  |
| H  | -3.835131 | 9.573045  | 4.070863  |
| H  | -2.645069 | 10.828294 | 3.674681  |
| C  | -2.503188 | 10.076843 | 5.692921  |
| C  | -2.832686 | 8.960288  | 6.462362  |
| H  | -3.653740 | 8.318615  | 6.149414  |
| C  | -2.120902 | 8.650152  | 7.617816  |
| H  | -2.390606 | 7.758898  | 8.180640  |
| C  | -1.058547 | 9.449825  | 8.052939  |
| C  | -2.281294 | 8.627940  | 15.900577 |
| C  | -4.344306 | 8.303864  | 17.224395 |
| C  | -4.789443 | 9.503797  | 17.800124 |
| C  | -3.837954 | 10.617958 | 18.194509 |
| H  | -2.822252 | 10.324350 | 17.908857 |
| C  | -3.845248 | 10.834747 | 19.714164 |
| H  | -4.828977 | 11.168668 | 20.062239 |
| H  | -3.112981 | 11.601053 | 19.990957 |
| H  | -3.595376 | 9.911702  | 20.248031 |
| C  | -7.047674 | 8.643886  | 17.640897 |
| H  | -8.113252 | 8.777213  | 17.805344 |
| C  | -6.579857 | 7.472656  | 17.060816 |
| H  | -7.285095 | 6.698723  | 16.771453 |
| C  | -5.216102 | 7.276390  | 16.838978 |
| C  | -6.161739 | 9.648198  | 18.006730 |
| H  | -6.541792 | 10.562574 | 18.453707 |
| C  | -4.159127 | 11.918833 | 17.447018 |
| H  | -4.142669 | 11.757195 | 16.364745 |
| H  | -3.414870 | 12.684714 | 17.691918 |
| H  | -5.144858 | 12.307268 | 17.726380 |

C -2.017607 7.718831 17.952639  
 H -2.330365 7.310960 18.901328  
 C -0.783412 7.887850 17.423367  
 H 0.185592 7.608419 17.803914  
 C -0.375142 7.301381 10.135600  
 C -1.592031 6.849422 10.665827  
 H -2.405115 7.551617 10.834030  
 C -1.791715 5.509854 10.984075  
 H -2.749502 5.193070 11.391400  
 C -0.772121 4.573219 10.811179  
 C 0.447657 5.016911 10.292799  
 H 1.258041 4.304729 10.149966  
 C 0.641059 6.352920 9.957134  
 H 1.602732 6.663974 9.554113  
 C -0.961358 3.135091 11.208579  
 H -0.494468 2.457317 10.486886  
 H -2.021682 2.878836 11.286587  
 H -0.499604 2.938520 12.184515  
 C -1.426141 10.866012 6.107946  
 H -1.139805 11.733938 5.517209  
 C -0.722338 10.561514 7.265783  
 H 0.109949 11.198270 7.559362  
 C 1.699137 9.392245 9.275228  
 C 2.222741 9.059506 8.017490  
 H 1.562391 8.675219 7.242644  
 C 3.575901 9.215739 7.737296  
 H 3.955491 8.946537 6.753738  
 C 4.457730 9.716369 8.698692  
 C 5.913199 9.922760 8.380484  
 H 6.086050 10.934232 7.992259  
 H 6.258939 9.216505 7.620051  
 H 6.536598 9.803506 9.271586  
 C 3.942180 10.048130 9.953478  
 H 4.608886 10.440435 10.719502  
 C 2.589639 9.887698 10.232145  
 H 2.212085 10.149141 11.216354  
 C -4.062068 12.113772 12.218433  
 H -3.711152 13.148836 12.197902  
 H -3.898384 11.718661 13.225143  
 H -5.144080 12.123023 12.033975  
 C -4.314182 9.527742 10.638548  
 H -5.345919 9.846315 10.441934  
 H -4.327480 8.898268 11.535552  
 H -3.987301 8.926025 9.784586  
 C -3.315121 12.071849 9.274324  
 H -3.003788 11.484348 8.406102  
 H -2.683879 12.966136 9.322231  
 H -4.348728 12.403847 9.111573  
 C 0.776132 13.153422 9.914413  
 H -0.064266 13.227766 9.215401  
 H 1.514955 12.466355 9.487652  
 H 1.239013 14.145402 9.991767  
 C -0.959355 13.875406 12.328321  
 H -1.428097 13.540926 13.259903  
 H -1.753776 14.133321 11.621248  
 H -0.391359 14.789595 12.541631  
 C 1.689509 12.478260 12.780194  
 H 1.981569 13.498343 13.060936

H 2.557624 12.000839 12.316604  
 H 1.453847 11.923674 13.693899  
 C 0.180151 7.992561 13.965646  
 C 0.040691 6.449756 13.994335  
 H 0.196350 6.147607 12.948626  
 C 1.158947 5.832622 14.842155  
 H 1.038231 6.103495 15.897991  
 H 2.144979 6.178526 14.516621  
 H 1.135518 4.739000 14.775216  
 C -1.321368 5.905024 14.421005  
 H -1.402308 4.848024 14.140241  
 H -2.139268 6.447685 13.935615  
 H -1.454522 5.964335 15.506906  
 C 1.412253 8.379508 13.207408  
 H 1.520892 7.928183 12.223202  
 C 2.411243 9.127234 13.729702  
 H 3.308100 9.291903 13.135644  
 C 2.317899 9.742632 15.012766  
 H 3.114800 10.399899 15.337363  
 C 1.166876 9.613424 15.753238  
 C 0.923266 10.482441 16.981411  
 H 0.477289 9.871991 17.775597  
 C -0.103026 11.576097 16.632645  
 H 0.311361 12.255645 15.878730  
 H -0.349046 12.165011 17.524283  
 H -1.028302 11.155613 16.224720  
 C 2.190295 11.108506 17.563888  
 H 2.623486 11.849607 16.883123  
 H 2.953729 10.354219 17.781466  
 H 1.947617 11.627080 18.497243  
 C 0.111597 8.790504 15.254078  
 C -4.723641 6.002318 16.183244  
 H -3.629550 6.023266 16.183004  
 C -5.179010 5.934321 14.718578  
 H -6.271680 5.884453 14.647091  
 H -4.766049 5.041189 14.235786  
 H -4.836103 6.817346 14.169453  
 C -5.163614 4.756650 16.962866  
 H -4.844225 4.809575 18.008986  
 H -4.725709 3.858204 16.514778  
 H -6.252461 4.636854 16.949477

Calculated energies and coordinates of D

Electronic energy ... -4000.69880301 Eh  
 Total Enthalpy ... -3999.47389881 Eh  
 Final Gibbs free energy ... -3999.64478117 Eh

CARTESIAN COORDINATES (ANGSTROEM)

Si -0.129304 9.155241 9.740220  
 Si -0.803528 10.600407 11.523491  
 Si -1.059134 9.220999 13.411420  
 P -3.112146 9.023470 14.259090  
 Si -3.032092 11.350293 11.075659  
 Si 0.506748 12.586666 11.647634  
 N -2.958488 8.048825 16.915257  
 N -1.009378 8.521048 16.041874

|   |           |           |           |   |           |           |           |
|---|-----------|-----------|-----------|---|-----------|-----------|-----------|
| C | -3.393588 | 10.621220 | 4.639736  | C | 5.888982  | 9.573356  | 8.195892  |
| H | -4.108090 | 11.415785 | 4.888134  | H | 6.111166  | 10.573511 | 7.803496  |
| H | -3.964773 | 9.773269  | 4.251395  | H | 6.152763  | 8.850892  | 7.417810  |
| H | -2.750913 | 11.000189 | 3.838974  | H | 6.541978  | 9.406914  | 9.057667  |
| C | -2.588739 | 10.232972 | 5.849580  | C | 4.007426  | 9.778264  | 9.867984  |
| C | -2.935024 | 9.124320  | 6.623059  | H | 4.736349  | 10.086900 | 10.615354 |
| H | -3.782860 | 8.509939  | 6.327341  | C | 2.660608  | 9.707630  | 10.206017 |
| C | -2.206255 | 8.786761  | 7.760283  | H | 2.351287  | 9.951253  | 11.218157 |
| H | -2.490635 | 7.901887  | 8.325889  | C | -3.732573 | 12.325821 | 12.534942 |
| C | -1.108867 | 9.550421  | 8.173748  | H | -3.266994 | 13.309431 | 12.638661 |
| C | -2.358512 | 8.529622  | 15.777704 | H | -3.608154 | 11.781390 | 13.476472 |
| C | -4.373451 | 8.084563  | 17.138752 | H | -4.807789 | 12.476619 | 12.373428 |
| C | -4.936709 | 9.283878  | 17.602178 | C | -4.212934 | 9.919436  | 10.722499 |
| C | -4.103368 | 10.522380 | 17.873335 | H | -5.211306 | 10.331870 | 10.527219 |
| H | -3.060652 | 10.300360 | 17.622357 | H | -4.301153 | 9.230755  | 11.569442 |
| C | -4.148251 | 10.902645 | 19.359732 | H | -3.908442 | 9.356608  | 9.834505  |
| H | -5.162937 | 11.176021 | 19.669717 | C | -3.048772 | 12.473240 | 9.555898  |
| H | -3.496550 | 11.762345 | 19.550391 | H | -2.766475 | 11.927468 | 8.650243  |
| H | -3.816087 | 10.072251 | 19.991887 | H | -2.375510 | 13.330486 | 9.660296  |
| C | -7.096318 | 8.188309  | 17.562687 | H | -4.064592 | 12.864568 | 9.414963  |
| H | -8.169210 | 8.229031  | 17.728761 | C | 0.983536  | 13.083527 | 9.888352  |
| C | -6.513501 | 7.017884  | 17.096785 | H | 0.102600  | 13.183304 | 9.245280  |
| H | -7.136685 | 6.150741  | 16.897102 | H | 1.655811  | 12.345781 | 9.436832  |
| C | -5.137851 | 6.939853  | 16.873770 | H | 1.501609  | 14.050787 | 9.903710  |
| C | -6.315667 | 9.308871  | 17.812934 | C | -0.521111 | 13.987045 | 12.393966 |
| H | -6.784801 | 10.220428 | 18.172532 | H | -0.926043 | 13.719305 | 13.375528 |
| C | -4.543397 | 11.693211 | 16.984615 | H | -1.358355 | 14.271049 | 11.749425 |
| H | -4.503622 | 11.410286 | 15.928177 | H | 0.117429  | 14.870324 | 12.521643 |
| H | -3.879277 | 12.551361 | 17.136585 | C | 2.073173  | 12.490463 | 12.693864 |
| H | -5.564654 | 12.012438 | 17.221071 | H | 2.529671  | 13.488363 | 12.724189 |
| C | -1.992751 | 7.763693  | 17.873658 | H | 2.815666  | 11.793810 | 12.296030 |
| H | -2.260379 | 7.382760  | 18.846988 | H | 1.844213  | 12.185172 | 13.719161 |
| C | -0.784742 | 8.036813  | 17.326311 | C | 0.259224  | 7.939014  | 13.924058 |
| H | 0.209627  | 7.904628  | 17.721911 | C | 0.136883  | 6.408647  | 14.079378 |
| C | -0.473256 | 7.365268  | 10.227281 | H | 0.335823  | 6.033459  | 13.063908 |
| C | -1.698303 | 6.989626  | 10.794001 | C | 1.234769  | 5.867577  | 15.007249 |
| H | -2.460624 | 7.740503  | 10.991652 | H | 1.072580  | 6.211764  | 16.035539 |
| C | -1.969433 | 5.665267  | 11.122362 | H | 2.229452  | 6.199020  | 14.693663 |
| H | -2.929619 | 5.409471  | 11.565221 | H | 1.222782  | 4.771418  | 15.019756 |
| C | -1.017389 | 4.666917  | 10.915253 | C | -1.219837 | 5.843451  | 14.497645 |
| C | 0.210908  | 5.034282  | 10.357273 | H | -1.244918 | 4.767880  | 14.284132 |
| H | 0.970825  | 4.273040  | 10.190348 | H | -2.044563 | 6.318484  | 13.961400 |
| C | 0.476957  | 6.356081  | 10.016931 | H | -1.384874 | 5.962120  | 15.573952 |
| H | 1.442914  | 6.609048  | 9.584517  | C | 1.546477  | 8.267550  | 13.269877 |
| C | -1.286942 | 3.238326  | 11.301723 | H | 1.780469  | 7.687461  | 12.377675 |
| H | -1.145746 | 2.563705  | 10.449903 | C | 2.450107  | 9.135856  | 13.763859 |
| H | -2.308287 | 3.112061  | 11.671051 | H | 3.395647  | 9.273803  | 13.244314 |
| H | -0.599630 | 2.910543  | 12.090811 | C | 2.218605  | 9.888334  | 14.975927 |
| C | -1.477648 | 10.985819 | 6.241689  | H | 2.997977  | 10.562301 | 15.313814 |
| H | -1.177045 | 11.845985 | 5.646642  | C | 1.033656  | 9.831449  | 15.623621 |
| C | -0.756592 | 10.653579 | 7.381248  | C | 0.672134  | 10.775184 | 16.756547 |
| H | 0.104532  | 11.260035 | 7.653803  | H | 0.250388  | 10.198480 | 17.590834 |
| C | 1.691683  | 9.319350  | 9.275784  | C | -0.432400 | 11.739731 | 16.282528 |
| C | 2.131149  | 8.998384  | 7.983064  | H | -0.055353 | 12.366932 | 15.465879 |
| H | 1.409445  | 8.692698  | 7.228375  | H | -0.741273 | 12.396571 | 17.103843 |
| C | 3.478009  | 9.065952  | 7.643160  | H | -1.315289 | 11.209161 | 15.911081 |
| H | 3.790620  | 8.808351  | 6.633211  | C | 1.857937  | 11.562606 | 17.312112 |
| C | 4.438453  | 9.461703  | 8.577904  | H | 2.264320  | 12.255240 | 16.566036 |

|   |           |           |           |
|---|-----------|-----------|-----------|
| H | 2.665821  | 10.901698 | 17.643263 |
| H | 1.533985  | 12.159803 | 18.170610 |
| C | -0.034957 | 8.970608  | 15.071342 |
| C | -4.521739 | 5.662485  | 16.341009 |
| H | -3.435988 | 5.793647  | 16.323933 |
| C | -4.973601 | 5.400806  | 14.896984 |
| H | -6.054068 | 5.221838  | 14.849209 |
| H | -4.464547 | 4.516199  | 14.497325 |
| H | -4.736151 | 6.257362  | 14.257852 |
| C | -4.829364 | 4.462696  | 17.246102 |
| H | -4.513426 | 4.651158  | 18.277586 |
| H | -4.303453 | 3.573204  | 16.882681 |
| H | -5.900216 | 4.232123  | 17.259312 |

|   |           |           |           |
|---|-----------|-----------|-----------|
| H | -2.502654 | 4.035014  | 3.527151  |
| H | -4.180837 | 3.636136  | 3.932207  |
| C | -0.741238 | -0.721045 | 5.166912  |
| H | -0.940473 | -0.883083 | 6.214764  |
| C | 0.420260  | -0.724883 | 4.474895  |
| H | 1.423074  | -0.932578 | 4.806240  |
| C | 1.327442  | -1.868239 | -3.032483 |
| C | 0.185863  | -2.553349 | -2.597440 |
| H | -0.717128 | -1.998000 | -2.350892 |
| C | 0.186073  | -3.934228 | -2.441270 |
| H | -0.713593 | -4.436896 | -2.091625 |
| C | 1.334510  | -4.685457 | -2.704029 |
| C | 2.477221  | -4.008767 | -3.136270 |
| H | 3.386663  | -4.571097 | -3.338382 |
| C | 2.472677  | -2.627105 | -3.302265 |
| H | 3.384094  | -2.129074 | -3.625967 |
| C | 1.330668  | -6.180817 | -2.540601 |
| H | 0.964449  | -6.671318 | -3.451000 |
| H | 0.676808  | -6.488797 | -1.718710 |
| H | 2.336484  | -6.562867 | -2.343077 |
| C | 0.050282  | 1.969685  | -6.698654 |
| H | 0.197871  | 2.954302  | -7.137952 |
| C | 0.665612  | 1.653641  | -5.495092 |
| H | 1.296763  | 2.398515  | -5.012687 |
| C | 3.120547  | 0.587199  | -3.433634 |
| C | 3.746370  | 0.549511  | -4.689181 |
| H | 3.179590  | 0.242046  | -5.565457 |
| C | 5.084221  | 0.898264  | -4.838788 |
| H | 5.543590  | 0.854739  | -5.824258 |
| C | 5.848579  | 1.305815  | -3.742468 |
| C | 7.284264  | 1.721610  | -3.911763 |
| H | 7.752412  | 1.204147  | -4.754338 |
| H | 7.868270  | 1.513086  | -3.010413 |
| H | 7.356177  | 2.798854  | -4.107155 |
| C | 5.231746  | 1.343543  | -2.490362 |
| H | 5.804289  | 1.657438  | -1.619364 |
| C | 3.895184  | 0.990439  | -2.342001 |
| H | 3.446249  | 1.019868  | -1.354815 |
| C | -3.168069 | 2.398747  | -1.035883 |
| H | -2.821204 | 3.436174  | -1.085942 |
| H | -3.119653 | 2.066584  | 0.004795  |
| H | -4.220234 | 2.387381  | -1.348978 |
| C | -3.056824 | -0.394114 | -2.303747 |
| H | -4.123476 | -0.242663 | -2.511973 |
| H | -2.978673 | -0.956295 | -1.366302 |
| H | -2.646598 | -1.005508 | -3.115477 |
| C | -2.344641 | 2.092316  | -3.912947 |
| H | -2.058371 | 1.414586  | -4.720889 |
| H | -1.737527 | 2.997675  | -4.006022 |
| H | -3.395352 | 2.376040  | -4.058086 |
| C | 0.093397  | 4.497369  | -2.041067 |
| H | -0.994120 | 4.486120  | -2.158751 |
| H | 0.539216  | 4.323866  | -3.026939 |
| H | 0.386509  | 5.503350  | -1.715101 |
| C | -0.148717 | 3.524422  | 0.877009  |
| H | 0.118274  | 2.752560  | 1.607777  |
| H | -1.238610 | 3.511725  | 0.785961  |
| H | 0.152701  | 4.500640  | 1.278544  |

Calculated energies and coordinates of **TS[D-E]**

|                         |     |                   |
|-------------------------|-----|-------------------|
| Electronic energy       | ... | -4000.67943915 Eh |
| Total Enthalpy          | ... | -3999.45618353 Eh |
| Final Gibbs free energy | ... | -3999.62551697 Eh |

CARTESIAN COORDINATES (ANGSTROEM)

|    |           |           |           |
|----|-----------|-----------|-----------|
| Si | 1.335952  | 0.004819  | -3.252009 |
| Si | 0.086531  | 1.036736  | -1.496693 |
| Si | -0.134908 | -0.276170 | 0.459576  |
| P  | -2.115206 | -0.058546 | 1.485516  |
| Si | -2.192027 | 1.285207  | -2.212712 |
| Si | 0.699242  | 3.219401  | -0.785077 |
| N  | -1.768312 | -0.473399 | 4.261882  |
| N  | 0.114484  | -0.444594 | 3.143202  |
| C  | -1.465573 | 1.401760  | -8.634627 |
| H  | -1.740479 | 0.509684  | -9.204493 |
| H  | -0.837240 | 2.035808  | -9.267870 |
| H  | -2.387318 | 1.959325  | -8.426806 |
| C  | -0.764151 | 1.040767  | -7.354042 |
| C  | -0.924050 | -0.217944 | -6.772772 |
| H  | -1.541026 | -0.962320 | -7.271826 |
| C  | -0.300745 | -0.536478 | -5.568873 |
| H  | -0.433639 | -1.531888 | -5.150066 |
| C  | 0.501177  | 0.394488  | -4.899598 |
| C  | -1.252942 | -0.313064 | 3.001692  |
| C  | -3.147367 | -0.287588 | 4.594227  |
| C  | -3.605791 | 1.017920  | 4.826501  |
| C  | -2.699734 | 2.229374  | 4.714280  |
| H  | -1.709126 | 1.891419  | 4.391273  |
| C  | -2.535106 | 2.920088  | 6.075251  |
| H  | -3.490996 | 3.314163  | 6.437895  |
| H  | -1.835748 | 3.759157  | 5.992685  |
| H  | -2.150823 | 2.224682  | 6.829051  |
| C  | -5.791347 | 0.077829  | 5.281408  |
| H  | -6.832405 | 0.221347  | 5.556932  |
| C  | -5.314471 | -1.200949 | 5.027452  |
| H  | -5.988808 | -2.049568 | 5.100432  |
| C  | -3.982121 | -1.410822 | 4.669017  |
| C  | -4.947541 | 1.175428  | 5.175545  |
| H  | -5.336931 | 2.171715  | 5.365555  |
| C  | -3.211920 | 3.209116  | 3.650008  |
| H  | -3.320956 | 2.705026  | 2.684726  |

|   |           |           |           |   |           |           |           |
|---|-----------|-----------|-----------|---|-----------|-----------|-----------|
| C | 2.548805  | 3.519985  | -0.569758 | N | -1.650544 | 0.269012  | 4.338714  |
| H | 2.693779  | 4.503111  | -0.102805 | N | 0.241917  | 0.098641  | 3.213386  |
| H | 3.071136  | 3.518674  | -1.531400 | C | -1.172056 | 2.009865  | -8.467454 |
| H | 3.015717  | 2.768566  | 0.072931  | H | -1.297607 | 1.206168  | -9.198535 |
| C | 0.833393  | -1.868626 | 0.735086  | H | -0.571548 | 2.802068  | -8.925325 |
| C | 0.285598  | -3.242073 | 1.144200  | H | -2.164773 | 2.429572  | -8.262596 |
| H | 0.777476  | -3.927796 | 0.435632  | C | -0.537522 | 1.505301  | -7.200577 |
| C | 0.754736  | -3.655049 | 2.546509  | C | -0.598715 | 0.156418  | -6.848966 |
| H | 0.221786  | -3.094864 | 3.321759  | H | -1.085494 | -0.548853 | -7.519458 |
| H | 1.828217  | -3.474916 | 2.668323  | C | -0.041786 | -0.300944 | -5.657231 |
| H | 0.559711  | -4.720469 | 2.715736  | H | -0.095937 | -1.361377 | -5.421043 |
| C | -1.217781 | -3.453049 | 0.984986  | C | 0.593754  | 0.575295  | -4.771055 |
| H | -1.455825 | -4.518129 | 1.096150  | C | -1.146517 | -0.035769 | 3.099945  |
| H | -1.563285 | -3.125681 | -0.001394 | C | -3.041401 | 0.245580  | 4.673260  |
| H | -1.790677 | -2.892586 | 1.726668  | C | -3.781074 | 1.428985  | 4.539372  |
| C | 2.132626  | -1.928230 | 0.137285  | C | -3.158505 | 2.709136  | 4.019536  |
| H | 2.332057  | -2.839271 | -0.428569 | H | -2.175529 | 2.466639  | 3.601585  |
| C | 3.154141  | -1.023615 | 0.225054  | C | -2.948386 | 3.712761  | 5.162515  |
| H | 4.036645  | -1.206851 | -0.383067 | H | -3.906825 | 4.003853  | 5.607670  |
| C | 3.243003  | -0.008761 | 1.211784  | H | -2.456800 | 4.618062  | 4.789619  |
| H | 4.199987  | 0.500787  | 1.303819  | H | -2.325414 | 3.286789  | 5.956199  |
| C | 2.289895  | 0.224626  | 2.168698  | C | -5.699059 | 0.227667  | 5.399802  |
| C | 2.659612  | 1.075476  | 3.386255  | H | -6.745002 | 0.222132  | 5.693517  |
| H | 1.765874  | 1.209913  | 4.005073  | C | -4.949739 | -0.937139 | 5.493884  |
| C | 3.111568  | 2.485920  | 2.981347  | H | -5.418173 | -1.847893 | 5.856066  |
| H | 4.027808  | 2.459316  | 2.382224  | C | -3.603721 | -0.955889 | 5.126145  |
| H | 3.319409  | 3.083090  | 3.876933  | C | -5.122291 | 1.396858  | 4.922221  |
| H | 2.341768  | 2.997724  | 2.398345  | H | -5.723330 | 2.297778  | 4.840672  |
| C | 3.749208  | 0.411262  | 4.242707  | C | -3.988465 | 3.328095  | 2.888857  |
| H | 4.695990  | 0.379550  | 3.692935  | H | -4.164245 | 2.601510  | 2.089658  |
| H | 3.501606  | -0.623752 | 4.500988  | H | -3.456402 | 4.184392  | 2.461155  |
| H | 3.914706  | 0.971597  | 5.170542  | H | -4.959483 | 3.686818  | 3.247353  |
| C | 0.959417  | -0.303557 | 2.002627  | C | -0.616285 | 0.539757  | 5.220272  |
| C | -3.481987 | -2.809201 | 4.367618  | H | -0.804763 | 0.780478  | 6.255025  |
| H | -2.440409 | -2.733675 | 4.036019  | C | 0.547000  | 0.428884  | 4.545915  |
| C | -4.281967 | -3.448222 | 3.224883  | H | 1.545559  | 0.537986  | 4.921058  |
| H | -5.325244 | -3.617300 | 3.513581  | C | 1.493897  | -1.870071 | -3.193420 |
| H | -3.847302 | -4.417300 | 2.956982  | C | 0.358143  | -2.682113 | -3.084525 |
| H | -4.269626 | -2.807520 | 2.337510  | H | -0.617629 | -2.221040 | -2.944466 |
| C | -3.507184 | -3.689512 | 5.624618  | C | 0.448068  | -4.067268 | -3.123371 |
| H | -2.916428 | -3.245109 | 6.432648  | H | -0.453361 | -4.670049 | -3.030436 |
| H | -3.096175 | -4.680584 | 5.403717  | C | 1.686674  | -4.700315 | -3.255984 |
| H | -4.530765 | -3.823053 | 5.992429  | C | 2.824516  | -3.898965 | -3.360417 |

Calculated energies and coordinates of E

Electronic energy           ... -4000.70639384 Eh  
 Total Enthalpy             ... -3999.48138666 Eh  
 Final Gibbs free energy   ... -3999.65187977 Eh

CARTESIAN COORDINATES (ANGSTROEM)

|    |           |           |           |   |           |           |           |
|----|-----------|-----------|-----------|---|-----------|-----------|-----------|
| Si | 1.351564  | 0.010957  | -3.135504 | N | -1.650544 | 0.269012  | 4.338714  |
| Si | -0.050286 | 0.673113  | -1.305419 | N | 0.241917  | 0.098641  | 3.213386  |
| Si | -0.090377 | -0.747888 | 0.631417  | C | -1.172056 | 2.009865  | -8.467454 |
| P  | -2.059303 | -0.556104 | 1.698473  | H | -1.297607 | 1.206168  | -9.198535 |
| Si | -2.319637 | 0.811991  | -2.094091 | H | -0.571548 | 2.802068  | -8.925325 |
| Si | 0.286263  | 2.883567  | -0.476876 | H | -2.164773 | 2.429572  | -8.262596 |
|    |           |           |           | C | -0.537522 | 1.505301  | -7.200577 |
|    |           |           |           | C | -0.598715 | 0.156418  | -6.848966 |
|    |           |           |           | H | -1.085494 | -0.548853 | -7.519458 |
|    |           |           |           | C | -0.041786 | -0.300944 | -5.657231 |
|    |           |           |           | H | -0.095937 | -1.361377 | -5.421043 |
|    |           |           |           | C | 0.593754  | 0.575295  | -4.771055 |
|    |           |           |           | C | -1.146517 | -0.035769 | 3.099945  |
|    |           |           |           | C | -3.041401 | 0.245580  | 4.673260  |
|    |           |           |           | C | -3.781074 | 1.428985  | 4.539372  |
|    |           |           |           | C | -3.158505 | 2.709136  | 4.019536  |
|    |           |           |           | H | -2.175529 | 2.466639  | 3.601585  |
|    |           |           |           | C | -2.948386 | 3.712761  | 5.162515  |
|    |           |           |           | H | -3.906825 | 4.003853  | 5.607670  |
|    |           |           |           | H | -2.456800 | 4.618062  | 4.789619  |
|    |           |           |           | H | -2.325414 | 3.286789  | 5.956199  |
|    |           |           |           | C | -5.699059 | 0.227667  | 5.399802  |
|    |           |           |           | H | -6.745002 | 0.222132  | 5.693517  |
|    |           |           |           | C | -4.949739 | -0.937139 | 5.493884  |
|    |           |           |           | H | -5.418173 | -1.847893 | 5.856066  |
|    |           |           |           | C | -3.603721 | -0.955889 | 5.126145  |
|    |           |           |           | C | -5.122291 | 1.396858  | 4.922221  |
|    |           |           |           | H | -5.723330 | 2.297778  | 4.840672  |
|    |           |           |           | C | -3.988465 | 3.328095  | 2.888857  |
|    |           |           |           | H | -4.164245 | 2.601510  | 2.089658  |
|    |           |           |           | H | -3.456402 | 4.184392  | 2.461155  |
|    |           |           |           | H | -4.959483 | 3.686818  | 3.247353  |
|    |           |           |           | C | -0.616285 | 0.539757  | 5.220272  |
|    |           |           |           | H | -0.804763 | 0.780478  | 6.255025  |
|    |           |           |           | C | 0.547000  | 0.428884  | 4.545915  |
|    |           |           |           | H | 1.545559  | 0.537986  | 4.921058  |
|    |           |           |           | C | 1.493897  | -1.870071 | -3.193420 |
|    |           |           |           | C | 0.358143  | -2.682113 | -3.084525 |
|    |           |           |           | H | -0.617629 | -2.221040 | -2.944466 |
|    |           |           |           | C | 0.448068  | -4.067268 | -3.123371 |
|    |           |           |           | H | -0.453361 | -4.670049 | -3.030436 |
|    |           |           |           | C | 1.686674  | -4.700315 | -3.255984 |
|    |           |           |           | C | 2.824516  | -3.898965 | -3.360417 |
|    |           |           |           | H | 3.801112  | -4.368663 | -3.460138 |
|    |           |           |           | C | 2.729456  | -2.509995 | -3.337354 |
|    |           |           |           | H | 3.636769  | -1.915340 | -3.419252 |
|    |           |           |           | C | 1.781477  | -6.200847 | -3.302352 |
|    |           |           |           | H | 1.539456  | -6.576548 | -4.304219 |
|    |           |           |           | H | 1.078311  | -6.664815 | -2.603183 |
|    |           |           |           | H | 2.789913  | -6.544977 | -3.055687 |
|    |           |           |           | C | 0.116366  | 2.382457  | -6.329657 |
|    |           |           |           | H | 0.191136  | 3.436644  | -6.589396 |
|    |           |           |           | C | 0.668166  | 1.925880  | -5.140870 |
|    |           |           |           | H | 1.182077  | 2.633285  | -4.491708 |
|    |           |           |           | C | 3.098703  | 0.727746  | -3.151259 |
|    |           |           |           | C | 3.812184  | 0.767706  | -4.359433 |
|    |           |           |           | H | 3.330953  | 0.444279  | -5.280396 |
|    |           |           |           | C | 5.127661  | 1.214948  | -4.405661 |

|   |           |           |           |
|---|-----------|-----------|-----------|
| H | 5.656731  | 1.229781  | -5.356436 |
| C | 5.781900  | 1.649696  | -3.249496 |
| C | 7.192119  | 2.169862  | -3.308713 |
| H | 7.760691  | 1.689584  | -4.110621 |
| H | 7.718791  | 2.003306  | -2.364340 |
| H | 7.200062  | 3.249659  | -3.502790 |
| C | 5.076222  | 1.616630  | -2.045658 |
| H | 5.559915  | 1.953687  | -1.130037 |
| C | 3.761784  | 1.163851  | -2.002728 |
| H | 3.237807  | 1.143132  | -1.054705 |
| C | -3.415049 | 1.778559  | -0.892593 |
| H | -3.092446 | 2.816376  | -0.764985 |
| H | -3.449228 | 1.304025  | 0.092513  |
| H | -4.433133 | 1.795247  | -1.303360 |
| C | -3.122741 | -0.887780 | -2.293769 |
| H | -4.183861 | -0.751636 | -2.538254 |
| H | -3.066677 | -1.478644 | -1.374593 |
| H | -2.671845 | -1.465958 | -3.107347 |
| C | -2.473126 | 1.695592  | -3.756593 |
| H | -2.096362 | 1.091171  | -4.585690 |
| H | -1.945161 | 2.652920  | -3.779980 |
| H | -3.538689 | 1.893696  | -3.932697 |
| C | -0.390439 | 4.163093  | -1.695495 |
| H | -1.468692 | 4.066944  | -1.851325 |
| H | 0.096130  | 4.082828  | -2.673609 |
| H | -0.195258 | 5.170898  | -1.307301 |
| C | -0.623454 | 3.054419  | 1.172110  |
| H | -0.063683 | 2.539079  | 1.961225  |
| H | -1.630764 | 2.631968  | 1.152068  |
| H | -0.690960 | 4.115678  | 1.445610  |
| C | 2.068382  | 3.385721  | -0.110808 |
| H | 2.054584  | 4.352430  | 0.409335  |
| H | 2.679113  | 3.489889  | -1.012109 |
| H | 2.547613  | 2.656442  | 0.549815  |
| C | 0.520341  | -2.511750 | 0.367042  |
| C | -0.304905 | -3.772021 | 0.544859  |
| H | 0.262866  | -4.586460 | 0.067221  |
| C | -0.428738 | -4.103930 | 2.042253  |
| H | -0.974816 | -3.305081 | 2.556617  |
| H | 0.558911  | -4.201507 | 2.504216  |
| H | -0.978740 | -5.042447 | 2.182998  |
| C | -1.690131 | -3.724036 | -0.102588 |
| H | -2.174961 | -4.704513 | -0.030724 |
| H | -1.626701 | -3.453599 | -1.159621 |
| H | -2.335584 | -2.999797 | 0.405911  |
| C | 1.836170  | -2.635813 | 0.066370  |
| H | 2.188375  | -3.628583 | -0.234474 |
| C | 2.863375  | -1.634003 | 0.026053  |
| H | 3.662815  | -1.848762 | -0.682958 |
| C | 3.098751  | -0.555694 | 0.832415  |
| H | 4.059098  | -0.082336 | 0.647646  |
| C | 2.386689  | -0.041906 | 1.973928  |
| C | 3.263421  | 0.574162  | 3.065332  |
| H | 2.658035  | 1.312767  | 3.601718  |
| C | 4.487651  | 1.350090  | 2.557966  |
| H | 5.261614  | 0.687869  | 2.157440  |
| H | 4.933470  | 1.896818  | 3.395850  |
| H | 4.223668  | 2.080707  | 1.787200  |

|   |           |           |          |
|---|-----------|-----------|----------|
| C | 3.731309  | -0.524402 | 4.036628 |
| H | 4.404852  | -1.209530 | 3.510044 |
| H | 2.898911  | -1.124289 | 4.417654 |
| H | 4.276548  | -0.097559 | 4.887343 |
| C | 1.025175  | -0.173280 | 2.070070 |
| C | -2.799031 | -2.236652 | 5.230648 |
| H | -1.807881 | -2.054418 | 4.800710 |
| C | -3.443394 | -3.368641 | 4.420458 |
| H | -4.423201 | -3.644763 | 4.825224 |
| H | -2.806837 | -4.259635 | 4.448417 |
| H | -3.569592 | -3.069114 | 3.375264 |
| C | -2.607512 | -2.642391 | 6.698771 |
| H | -2.127529 | -1.842256 | 7.272226 |
| H | -1.981771 | -3.538820 | 6.768563 |
| H | -3.569755 | -2.864591 | 7.173840 |

#### Calculated energies and coordinates of TS[A-F]

|                         |     |                   |
|-------------------------|-----|-------------------|
| Electronic energy       | ... | -4057.21572926 Eh |
| Total Enthalpy          | ... | -4055.95635514 Eh |
| Final Gibbs free energy | ... | -4056.13297456 Eh |

#### CARTESIAN COORDINATES (ANGSTROEM)

|    |           |           |           |
|----|-----------|-----------|-----------|
| Si | 0.654597  | -0.172440 | -3.603206 |
| Si | -0.590891 | 0.880913  | -1.879717 |
| Si | 0.508676  | 0.107739  | 0.058516  |
| P  | -0.798109 | 0.772468  | 1.753631  |
| Si | -2.814765 | 0.072201  | -1.807151 |
| Si | -0.623636 | 3.245317  | -2.030262 |
| N  | -1.232662 | -0.401833 | 4.210328  |
| N  | 0.760446  | -0.951167 | 3.534288  |
| N  | 2.208003  | 0.971510  | -0.073080 |
| C  | -0.024203 | 2.616876  | -9.128704 |
| H  | -1.065213 | 2.599344  | -9.464902 |
| H  | 0.595227  | 2.147255  | -9.898437 |
| H  | 0.279707  | 3.668783  | -9.058598 |
| C  | 0.134168  | 1.926921  | -7.801342 |
| C  | 1.322419  | 1.271828  | -7.468733 |
| H  | 2.133424  | 1.237360  | -8.193451 |
| C  | 1.482522  | 0.663951  | -6.228058 |
| H  | 2.421200  | 0.163027  | -5.999909 |
| C  | 0.459810  | 0.687743  | -5.269688 |
| C  | -0.360578 | -0.245271 | 3.146933  |
| C  | -2.511970 | 0.240003  | 4.322574  |
| C  | -2.583672 | 1.460324  | 5.005771  |
| C  | -1.356934 | 2.155779  | 5.565182  |
| H  | -0.501100 | 1.480106  | 5.460552  |
| C  | -1.509061 | 2.465538  | 7.059883  |
| H  | -2.302797 | 3.198305  | 7.240720  |
| H  | -0.577054 | 2.885262  | 7.453820  |
| H  | -1.748843 | 1.563031  | 7.632031  |
| C  | -4.968743 | 1.453606  | 4.595707  |
| H  | -5.938310 | 1.932611  | 4.699134  |
| C  | -4.866294 | 0.244474  | 3.916901  |
| H  | -5.758268 | -0.203217 | 3.492044  |
| C  | -3.635403 | -0.390175 | 3.763375  |
| C  | -3.841171 | 2.054861  | 5.132220  |

|   |           |           |           |
|---|-----------|-----------|-----------|
| H | -3.933463 | 3.005329  | 5.649852  |
| C | -1.039516 | 3.425556  | 4.762266  |
| H | -0.883429 | 3.185295  | 3.705152  |
| H | -0.132061 | 3.901219  | 5.152058  |
| H | -1.858268 | 4.150428  | 4.834461  |
| C | -0.644016 | -1.134226 | 5.229048  |
| H | -1.163836 | -1.338447 | 6.151825  |
| C | 0.591701  | -1.479178 | 4.810122  |
| H | 1.371406  | -2.049877 | 5.288972  |
| C | 0.116398  | -1.973948 | -3.765322 |
| C | -0.297437 | -2.502206 | -4.994386 |
| H | -0.317093 | -1.862459 | -5.874340 |
| C | -0.692747 | -3.831718 | -5.112722 |
| H | -1.016819 | -4.211682 | -6.079481 |
| C | -0.680437 | -4.686266 | -4.009472 |
| C | -0.274039 | -4.163837 | -2.778383 |
| H | -0.277173 | -4.804412 | -1.898063 |
| C | 0.110128  | -2.834209 | -2.655653 |
| H | 0.383159  | -2.447197 | -1.672739 |
| C | -1.074688 | -6.132183 | -4.141522 |
| H | -1.591521 | -6.487164 | -3.244495 |
| H | -0.190266 | -6.766246 | -4.281835 |
| H | -1.731472 | -6.289117 | -5.002021 |
| C | -0.892945 | 1.946673  | -6.855001 |
| H | -1.831098 | 2.444646  | -7.092360 |
| C | -0.729457 | 1.341082  | -5.614315 |
| H | -1.545698 | 1.373854  | -4.897014 |
| C | 2.490800  | -0.127466 | -3.152395 |
| C | 3.217636  | 1.065093  | -3.291754 |
| H | 2.756126  | 1.921198  | -3.778113 |
| C | 4.517362  | 1.184031  | -2.814944 |
| H | 5.051510  | 2.125034  | -2.935317 |
| C | 5.151546  | 0.107402  | -2.185235 |
| C | 6.541290  | 0.254040  | -1.628548 |
| H | 6.979588  | -0.719146 | -1.388904 |
| H | 6.531565  | 0.853001  | -0.708961 |
| H | 7.204221  | 0.761823  | -2.336897 |
| C | 4.452892  | -1.094072 | -2.084323 |
| H | 4.935294  | -1.954099 | -1.624151 |
| C | 3.146962  | -1.210483 | -2.555108 |
| H | 2.635708  | -2.164424 | -2.456980 |
| C | -3.846457 | 1.139543  | -0.636737 |
| H | -3.859884 | 2.191099  | -0.942292 |
| H | -3.448953 | 1.090891  | 0.383649  |
| H | -4.884977 | 0.783552  | -0.624874 |
| C | -2.874543 | -1.714217 | -1.205756 |
| H | -3.918696 | -2.030826 | -1.090225 |
| H | -2.373766 | -1.823239 | -0.236907 |
| H | -2.390553 | -2.386203 | -1.920795 |
| C | -3.628741 | 0.111879  | -3.515917 |
| H | -3.073382 | -0.500697 | -4.235327 |
| H | -3.704431 | 1.128850  | -3.916264 |
| H | -4.646197 | -0.293716 | -3.447054 |
| C | -2.047915 | 3.881442  | -3.104720 |
| H | -3.017476 | 3.481716  | -2.791102 |
| H | -1.897539 | 3.623442  | -4.158289 |
| H | -2.099379 | 4.975539  | -3.034037 |
| C | -0.832396 | 3.949712  | -0.290914 |

|   |           |           |           |
|---|-----------|-----------|-----------|
| H | 0.006922  | 3.663744  | 0.352958  |
| H | -1.743389 | 3.576249  | 0.189012  |
| H | -0.885552 | 5.045346  | -0.325898 |
| C | 0.964273  | 3.952834  | -2.776015 |
| H | 0.906255  | 5.048528  | -2.797488 |
| H | 1.100165  | 3.603944  | -3.806041 |
| H | 1.852553  | 3.675712  | -2.198183 |
| C | 2.430173  | -2.038339 | 2.102148  |
| C | 1.622032  | -3.304274 | 1.840910  |
| H | 1.921024  | -3.613044 | 0.829000  |
| C | 2.077902  | -4.408536 | 2.812017  |
| H | 1.799271  | -4.153155 | 3.840890  |
| H | 3.162300  | -4.554110 | 2.780381  |
| H | 1.591752  | -5.357810 | 2.561128  |
| C | 0.093380  | -3.210275 | 1.831021  |
| H | -0.308985 | -4.110294 | 1.352461  |
| H | -0.248797 | -2.340223 | 1.262168  |
| H | -0.326334 | -3.163856 | 2.841334  |
| C | 3.717481  | -1.996762 | 1.555310  |
| H | 4.039431  | -2.819157 | 0.921138  |
| C | 4.576056  | -0.935540 | 1.791916  |
| H | 5.566674  | -0.931093 | 1.345802  |
| C | 4.165018  | 0.128869  | 2.584715  |
| H | 2.820856  | 1.015066  | 0.731623  |
| H | 4.843765  | 0.956177  | 2.772716  |
| C | 2.886165  | 0.147190  | 3.145444  |
| C | 2.463264  | 1.316620  | 4.015743  |
| H | 1.406916  | 1.192422  | 4.270081  |
| C | 2.582514  | 2.654290  | 3.275331  |
| H | 3.618878  | 2.871438  | 2.992432  |
| H | 2.237056  | 3.468935  | 3.920560  |
| H | 1.963090  | 2.652901  | 2.372526  |
| C | 3.261669  | 1.328608  | 5.326767  |
| H | 4.329391  | 1.489062  | 5.139213  |
| H | 3.152790  | 0.380145  | 5.863377  |
| H | 2.908652  | 2.135023  | 5.979101  |
| C | 2.039196  | -0.945688 | 2.888956  |
| C | -3.507596 | -1.716313 | 3.038383  |
| H | -2.537677 | -1.710485 | 2.524521  |
| C | -4.584495 | -1.922392 | 1.971855  |
| H | -5.574040 | -2.077211 | 2.416960  |
| H | -4.349223 | -2.813531 | 1.381915  |
| H | -4.635277 | -1.069681 | 1.288623  |
| C | -3.525533 | -2.889140 | 4.032228  |
| H | -2.717747 | -2.819337 | 4.766751  |
| H | -3.411404 | -3.838753 | 3.497513  |
| H | -4.477527 | -2.914770 | 4.575451  |
| H | 2.014067  | -0.401005 | -0.282435 |
| H | 2.519589  | 1.558219  | -0.840140 |

Calculated energies and coordinates of F

|                         |     |                   |
|-------------------------|-----|-------------------|
| Electronic energy       | ... | -4057.31523585 Eh |
| Total Enthalpy          | ... | -4056.05221421 Eh |
| Final Gibbs free energy | ... | -4056.22845968 Eh |

CARTESIAN COORDINATES (ANGSTROM)

|    |           |           |           |   |           |           |           |
|----|-----------|-----------|-----------|---|-----------|-----------|-----------|
| Si | 0.676335  | -0.150949 | -3.612539 | H | -1.829340 | 2.447843  | -7.090822 |
| Si | -0.606234 | 0.832928  | -1.877073 | C | -0.710333 | 1.363803  | -5.611555 |
| Si | 0.594693  | 0.258963  | 0.072967  | H | -1.550026 | 1.326055  | -4.921466 |
| P  | -0.819296 | 0.714875  | 1.752488  | C | 2.503399  | -0.126519 | -3.117109 |
| Si | -2.799659 | -0.051118 | -1.780210 | C | 3.251309  | 1.057761  | -3.225558 |
| Si | -0.675484 | 3.197271  | -2.003205 | H | 2.802075  | 1.938343  | -3.677795 |
| N  | -1.225992 | -0.338654 | 4.252760  | C | 4.557811  | 1.136593  | -2.759613 |
| N  | 0.762557  | -0.926776 | 3.588497  | H | 5.106409  | 2.071882  | -2.854208 |
| N  | 2.048794  | 1.229601  | 0.045202  | C | 5.176563  | 0.031504  | -2.165755 |
| C  | 0.025146  | 2.788855  | -9.061779 | C | 6.579145  | 0.133360  | -1.631607 |
| H  | -1.003305 | 2.725066  | -9.429623 | H | 6.970979  | -0.848165 | -1.349569 |
| H  | 0.691488  | 2.378173  | -9.826055 | H | 6.613445  | 0.778687  | -0.745035 |
| H  | 0.268083  | 3.853000  | -8.951020 | H | 7.256771  | 0.569725  | -2.373272 |
| C  | 0.183582  | 2.067282  | -7.751393 | C | 4.449962  | -1.155243 | -2.079016 |
| C  | 1.396873  | 1.470154  | -7.401277 | H | 4.916615  | -2.035240 | -1.640935 |
| H  | 2.229662  | 1.503659  | -8.100912 | C | 3.139783  | -1.233563 | -2.543717 |
| C  | 1.554491  | 0.832318  | -6.175052 | H | 2.608615  | -2.178363 | -2.460319 |
| H  | 2.511975  | 0.374392  | -5.935496 | C | -3.888703 | 1.043634  | -0.689902 |
| C  | 0.504417  | 0.769196  | -5.248901 | H | -3.942784 | 2.073391  | -1.058323 |
| C  | -0.356413 | -0.228632 | 3.179032  | H | -3.503597 | 1.070957  | 0.335901  |
| C  | -2.507036 | 0.303119  | 4.333970  | H | -4.911011 | 0.643997  | -0.665515 |
| C  | -2.578768 | 1.578067  | 4.908932  | C | -2.822435 | -1.794608 | -1.059381 |
| C  | -1.349362 | 2.332703  | 5.375209  | H | -3.860035 | -2.135878 | -0.954896 |
| H  | -0.471642 | 1.705178  | 5.188850  | H | -2.357506 | -1.807983 | -0.066899 |
| C  | -1.403958 | 2.614032  | 6.882694  | H | -2.294529 | -2.502924 | -1.704467 |
| H  | -2.240371 | 3.275537  | 7.133790  | C | -3.563933 | -0.129938 | -3.509492 |
| H  | -0.480713 | 3.103838  | 7.211265  | H | -2.951710 | -0.735578 | -4.187814 |
| H  | -1.525157 | 1.688611  | 7.455956  | H | -3.682403 | 0.866134  | -3.950667 |
| C  | -4.974313 | 1.506802  | 4.571161  | H | -4.559336 | -0.588745 | -3.455973 |
| H  | -5.948164 | 1.978958  | 4.665934  | C | -2.069708 | 3.806493  | -3.131611 |
| C  | -4.870665 | 0.252358  | 3.980518  | H | -3.037348 | 3.360136  | -2.880482 |
| H  | -5.765669 | -0.236884 | 3.610959  | H | -1.855093 | 3.587114  | -4.182590 |
| C  | -3.634233 | -0.375842 | 3.843722  | H | -2.169532 | 4.894901  | -3.032533 |
| C  | -3.841345 | 2.164124  | 5.024313  | C | -0.963981 | 3.882746  | -0.269159 |
| H  | -3.933308 | 3.152534  | 5.465779  | H | -0.136635 | 3.605761  | 0.393517  |
| C  | -1.161899 | 3.626296  | 4.570560  | H | -1.885668 | 3.494777  | 0.177399  |
| H  | -1.095248 | 3.406764  | 3.500174  | H | -1.032106 | 4.977681  | -0.302999 |
| H  | -0.240549 | 4.132321  | 4.880026  | C | 0.937900  | 3.912289  | -2.673169 |
| H  | -1.994993 | 4.319280  | 4.732813  | H | 0.890701  | 5.008606  | -2.667064 |
| C  | -0.632424 | -1.028356 | 5.299000  | H | 1.111598  | 3.589188  | -3.705976 |
| H  | -1.147363 | -1.190706 | 6.232731  | H | 1.789497  | 3.604273  | -2.057477 |
| C  | 0.599339  | -1.397051 | 4.888681  | C | 2.367725  | -2.053797 | 2.116358  |
| H  | 1.379166  | -1.949485 | 5.388395  | C | 1.543256  | -3.320864 | 1.916553  |
| C  | 0.147937  | -1.944067 | -3.880462 | H | 1.790115  | -3.653200 | 0.897896  |
| C  | -0.191160 | -2.418645 | -5.154045 | C | 2.049635  | -4.403848 | 2.887181  |
| H  | -0.160079 | -1.741355 | -6.004856 | H | 1.833415  | -4.117830 | 3.923094  |
| C  | -0.576809 | -3.741012 | -5.353461 | H | 3.129509  | -4.556819 | 2.796006  |
| H  | -0.842082 | -4.077680 | -6.353608 | H | 1.544593  | -5.356110 | 2.690723  |
| C  | -0.630230 | -4.643535 | -4.290137 | C | 0.014773  | -3.232464 | 1.990673  |
| C  | -0.298551 | -4.176378 | -3.015556 | H | -0.407946 | -4.145341 | 1.556003  |
| H  | -0.351154 | -4.855228 | -2.166164 | H | -0.377481 | -2.379350 | 1.431394  |
| C  | 0.076462  | -2.853375 | -2.814266 | H | -0.344044 | -3.168950 | 3.023064  |
| H  | 0.295490  | -2.517173 | -1.801652 | C | 3.622462  | -2.022039 | 1.499923  |
| C  | -1.013756 | -6.081619 | -4.509623 | H | 3.902972  | -2.845091 | 0.847092  |
| H  | -1.556884 | -6.484601 | -3.649263 | C | 4.506720  | -0.974180 | 1.701860  |
| H  | -0.122275 | -6.704435 | -4.655148 | H | 5.471194  | -0.976403 | 1.201871  |
| H  | -1.642234 | -6.195251 | -5.397651 | C | 4.159803  | 0.078494  | 2.538500  |
| C  | -0.871257 | 1.997732  | -6.838178 | H | 2.688223  | 1.086754  | 0.817325  |



|   |           |           |           |
|---|-----------|-----------|-----------|
| H | 4.861818  | 0.891357  | 2.703209  |
| C | 2.910311  | 0.113280  | 3.158666  |
| C | 2.555582  | 1.271948  | 4.072661  |
| H | 1.545998  | 1.106941  | 4.460037  |
| C | 2.536636  | 2.609257  | 3.320788  |
| H | 3.518736  | 2.842962  | 2.893456  |
| H | 2.271648  | 3.418873  | 4.009664  |
| H | 1.801862  | 2.592446  | 2.510011  |
| C | 3.506089  | 1.322430  | 5.277376  |
| H | 4.533475  | 1.541375  | 4.966165  |
| H | 3.513972  | 0.369699  | 5.817617  |
| H | 3.192357  | 2.109240  | 5.971974  |
| C | 2.025954  | -0.955285 | 2.917761  |
| C | -3.504884 | -1.743710 | 3.201520  |
| H | -2.533035 | -1.768879 | 2.692922  |
| C | -4.576126 | -2.009436 | 2.141740  |
| H | -5.567438 | -2.145265 | 2.588951  |
| H | -4.334497 | -2.928600 | 1.598733  |
| H | -4.627607 | -1.191825 | 1.416525  |
| C | -3.525143 | -2.854531 | 4.263416  |
| H | -2.713431 | -2.739885 | 4.987870  |
| H | -3.415896 | -3.835835 | 3.788018  |
| H | -4.474943 | -2.842865 | 4.810780  |
| H | 0.869909  | -1.213509 | -0.030140 |
| H | 2.579352  | 1.170168  | -0.818291 |

|   |           |           |           |
|---|-----------|-----------|-----------|
| C | -1.891738 | 3.194341  | 6.409569  |
| H | -2.733031 | 3.892109  | 6.486421  |
| H | -1.000225 | 3.699786  | 6.797359  |
| H | -2.108949 | 2.336737  | 7.055380  |
| C | -5.189671 | 1.963616  | 3.757275  |
| H | -6.136476 | 2.482650  | 3.637216  |
| C | -5.082804 | 0.628727  | 3.382845  |
| H | -5.947225 | 0.124141  | 2.964814  |
| C | -3.880729 | -0.062618 | 3.521881  |
| C | -4.092186 | 2.637655  | 4.268876  |
| H | -4.183713 | 3.684937  | 4.543127  |
| C | -1.330765 | 3.950984  | 4.056096  |
| H | -1.174179 | 3.618611  | 3.025588  |
| H | -0.416948 | 4.442995  | 4.408504  |
| H | -2.133793 | 4.696364  | 4.061600  |
| C | -1.157521 | -0.587982 | 5.478487  |
| H | -1.799779 | -0.557011 | 6.344601  |
| C | 0.078483  | -1.104918 | 5.310390  |
| H | 0.733113  | -1.615778 | 5.998677  |
| C | 0.232771  | -1.911830 | -4.068205 |
| C | -0.002480 | -2.343008 | -5.379862 |
| H | 0.028200  | -1.625529 | -6.197017 |
| C | -0.268224 | -3.680030 | -5.663877 |
| H | -0.448533 | -3.985190 | -6.692799 |
| C | -0.303412 | -4.637668 | -4.648887 |
| C | -0.053691 | -4.216836 | -3.339657 |
| H | -0.070589 | -4.945278 | -2.530833 |
| C | 0.205859  | -2.881558 | -3.054864 |
| H | 0.388211  | -2.583915 | -2.021031 |
| C | -0.627973 | -6.075904 | -4.948665 |
| H | -1.696774 | -6.272734 | -4.798239 |
| H | -0.076238 | -6.754177 | -4.290347 |
| H | -0.389399 | -6.331229 | -5.985292 |
| C | -1.319787 | 1.788195  | -6.783485 |
| H | -2.282902 | 1.686817  | -7.280162 |
| C | -0.977343 | 0.905619  | -5.766563 |
| H | -1.685882 | 0.131189  | -5.488256 |
| C | 2.575629  | -0.091420 | -3.514856 |
| C | 3.260249  | 0.934604  | -2.852932 |
| H | 2.692231  | 1.720020  | -2.359219 |
| C | 4.650250  | 0.985513  | -2.818207 |
| H | 5.148053  | 1.797605  | -2.291512 |
| C | 5.417536  | 0.004948  | -3.449579 |
| C | 6.920651  | 0.065423  | -3.437984 |
| H | 7.290180  | 0.641544  | -2.584777 |
| H | 7.297393  | 0.546359  | -4.349171 |
| H | 7.359620  | -0.936132 | -3.394019 |
| C | 4.745465  | -1.021850 | -4.118805 |
| H | 5.320916  | -1.798092 | -4.620296 |
| C | 3.354489  | -1.067858 | -4.152950 |
| H | 2.863582  | -1.885091 | -4.677711 |
| C | -3.747459 | 0.825752  | -0.654544 |
| H | -3.809905 | 1.828880  | -1.089900 |
| H | -3.409200 | 0.923919  | 0.383315  |
| H | -4.760636 | 0.402439  | -0.655986 |
| C | -2.629934 | -2.020779 | -0.865083 |
| H | -3.659969 | -2.399252 | -0.863453 |
| H | -2.267319 | -1.998416 | 0.168352  |

#### Calculated energies and coordinates of G

Electronic energy ... -4113.82690866 Eh  
 Total Enthalpy ... -4112.51939254 Eh  
 Final Gibbs free energy ... -4112.70231004 Eh

#### CARTESIAN COORDINATES (ANGSTROEM)

|    |           |           |           |
|----|-----------|-----------|-----------|
| Si | 0.680377  | -0.128171 | -3.636662 |
| Si | -0.370555 | 0.569911  | -1.621291 |
| Si | 0.596399  | -0.591591 | 0.262965  |
| P  | -0.641505 | 0.632138  | 1.735473  |
| Si | -2.587490 | -0.297199 | -1.640837 |
| Si | -0.592614 | 2.937316  | -1.737700 |
| N  | -1.550516 | -0.053654 | 4.261158  |
| N  | 0.444623  | -0.877014 | 3.987348  |
| N  | 2.385263  | 0.361931  | 0.313279  |
| C  | -0.843233 | 3.793817  | -8.241055 |
| H  | -1.431009 | 3.312842  | -9.029149 |
| H  | 0.034897  | 4.257141  | -8.700102 |
| H  | -1.459032 | 4.597874  | -7.819194 |
| C  | -0.449521 | 2.809656  | -7.173751 |
| C  | 0.784334  | 2.897805  | -6.528034 |
| H  | 1.489147  | 3.671829  | -6.825160 |
| C  | 1.130014  | 2.006383  | -5.516624 |
| H  | 2.109734  | 2.095173  | -5.052198 |
| C  | 0.253502  | 0.996104  | -5.099434 |
| C  | -0.543326 | -0.177531 | 3.316264  |
| C  | -2.789055 | 0.642584  | 4.055504  |
| C  | -2.863783 | 1.991233  | 4.423207  |
| C  | -1.668089 | 2.755633  | 4.956098  |
| H  | -0.801799 | 2.086121  | 4.940411  |

|   |           |           |           |
|---|-----------|-----------|-----------|
| H | -2.012030 | -2.724603 | -1.431273 |
| C | -3.331088 | -0.476946 | -3.371985 |
| H | -2.765127 | -1.199591 | -3.970818 |
| H | -3.361557 | 0.476296  | -3.909789 |
| H | -4.360432 | -0.847942 | -3.284592 |
| C | -1.762260 | 3.434545  | -3.139671 |
| H | -2.746237 | 2.964607  | -3.038278 |
| H | -1.355029 | 3.149937  | -4.115394 |
| H | -1.907247 | 4.522710  | -3.132836 |
| C | -1.239616 | 3.673084  | -0.121562 |
| H | -0.507349 | 3.535030  | 0.680961  |
| H | -2.170774 | 3.208702  | 0.214644  |
| H | -1.412189 | 4.749319  | -0.254486 |
| C | 1.045909  | 3.838875  | -2.071962 |
| H | 0.856413  | 4.920017  | -2.087128 |
| H | 1.478703  | 3.567683  | -3.040357 |
| H | 1.792553  | 3.655050  | -1.289624 |
| C | 2.143027  | -2.324086 | 2.972188  |
| C | 1.262307  | -3.565391 | 2.885134  |
| H | 1.634994  | -4.106460 | 2.003997  |
| C | 1.527691  | -4.452524 | 4.115473  |
| H | 1.170395  | -3.958849 | 5.026491  |
| H | 2.594203  | -4.665851 | 4.240717  |
| H | 0.990989  | -5.402725 | 4.019105  |
| C | -0.244870 | -3.386742 | 2.679736  |
| H | -0.670021 | -4.348865 | 2.372299  |
| H | -0.452390 | -2.655546 | 1.892635  |
| H | -0.754584 | -3.084178 | 3.599608  |
| C | 3.473517  | -2.469472 | 2.562285  |
| H | 3.781981  | -3.418244 | 2.128779  |
| C | 4.395252  | -1.443207 | 2.696046  |
| H | 5.418418  | -1.584446 | 2.359723  |
| C | 4.011379  | -0.233702 | 3.261797  |
| H | 2.362480  | 1.309070  | -0.051383 |
| H | 4.741647  | 0.562213  | 3.380574  |
| C | 2.696118  | -0.031060 | 3.686471  |
| C | 2.312229  | 1.286009  | 4.337035  |
| H | 1.245498  | 1.252931  | 4.574813  |
| C | 2.521543  | 2.477846  | 3.394047  |
| H | 3.566760  | 2.563539  | 3.073861  |
| H | 2.252689  | 3.409919  | 3.902875  |
| H | 1.876882  | 2.382482  | 2.513220  |
| C | 3.075789  | 1.477016  | 5.655234  |
| H | 4.153556  | 1.572727  | 5.482446  |
| H | 2.917171  | 0.628994  | 6.329735  |
| H | 2.734404  | 2.386750  | 6.160912  |
| C | 1.777748  | -1.084625 | 3.517025  |
| C | -3.750817 | -1.520717 | 3.122424  |
| H | -2.743092 | -1.648128 | 2.705486  |
| C | -4.749141 | -1.939918 | 2.041775  |
| H | -5.772551 | -1.985799 | 2.431945  |
| H | -4.493529 | -2.939408 | 1.676173  |
| H | -4.728200 | -1.254012 | 1.190911  |
| C | -3.894814 | -2.445658 | 4.342188  |
| H | -3.137789 | -2.242877 | 5.104426  |
| H | -3.790077 | -3.492676 | 4.035973  |
| H | -4.883267 | -2.320154 | 4.799579  |
| H | 2.694230  | 0.403048  | 1.283617  |

|   |          |           |           |
|---|----------|-----------|-----------|
| H | 3.074578 | -0.210299 | -0.204068 |
| N | 3.735160 | -2.014575 | -0.847218 |
| H | 3.793966 | -2.009211 | -1.861473 |
| H | 4.461717 | -2.631556 | -0.504003 |
| H | 2.837705 | -2.431500 | -0.602996 |

Calculated energies and coordinates of **TS[G-H]**

|                         |     |                   |
|-------------------------|-----|-------------------|
| Electronic energy       | ... | -4113.80297463 Eh |
| Total Enthalpy          | ... | -4112.49989350 Eh |
| Final Gibbs free energy | ... | -4112.67887209 Eh |

CARTESIAN COORDINATES (ANGSTROEM)

|    |           |           |           |
|----|-----------|-----------|-----------|
| Si | 0.643129  | -0.012116 | -3.580963 |
| Si | -0.574898 | 0.892829  | -1.764575 |
| Si | 0.683553  | 0.210085  | 0.160341  |
| P  | -0.841822 | 0.793705  | 1.733994  |
| Si | -2.727723 | -0.098297 | -1.713775 |
| Si | -0.874138 | 3.228261  | -2.016941 |
| N  | -1.453892 | -0.312575 | 4.163198  |
| N  | 0.548106  | -0.990486 | 3.615590  |
| N  | 2.007137  | 1.556094  | 0.254237  |
| C  | -0.283691 | 2.943099  | -8.992967 |
| H  | -1.217585 | 2.625870  | -9.467274 |
| H  | 0.535452  | 2.775564  | -9.698296 |
| H  | -0.355887 | 4.024295  | -8.821283 |
| C  | -0.051434 | 2.211573  | -7.699055 |
| C  | 1.235975  | 1.863870  | -7.287209 |
| H  | 2.083550  | 2.102187  | -7.926832 |
| C  | 1.451378  | 1.214289  | -6.074959 |
| H  | 2.468340  | 0.953883  | -5.790537 |
| C  | 0.387348  | 0.890091  | -5.223031 |
| C  | -0.506705 | -0.209954 | 3.149823  |
| C  | -2.688597 | 0.415659  | 4.197519  |
| C  | -2.683094 | 1.706239  | 4.742492  |
| C  | -1.409304 | 2.374880  | 5.220103  |
| H  | -0.568605 | 1.721042  | 4.968455  |
| C  | -1.419688 | 2.556517  | 6.743882  |
| H  | -2.235937 | 3.217366  | 7.056878  |
| H  | -0.477259 | 3.001571  | 7.082666  |
| H  | -1.549443 | 1.597219  | 7.256628  |
| C  | -5.074907 | 1.781770  | 4.383272  |
| H  | -6.016829 | 2.318129  | 4.457402  |
| C  | -5.048238 | 0.508877  | 3.825683  |
| H  | -5.970360 | 0.068896  | 3.460182  |
| C  | -3.853258 | -0.201268 | 3.715589  |
| C  | -3.904402 | 2.375741  | 4.831883  |
| H  | -3.936030 | 3.377548  | 5.251320  |
| C  | -1.172443 | 3.707548  | 4.498475  |
| H  | -1.182096 | 3.559538  | 3.413976  |
| H  | -0.198587 | 4.121488  | 4.785362  |
| H  | -1.936853 | 4.448345  | 4.758516  |
| C  | -0.995029 | -1.100284 | 5.203829  |
| H  | -1.580509 | -1.262187 | 6.094916  |
| C  | 0.234084  | -1.534251 | 4.864558  |
| H  | 0.942645  | -2.144882 | 5.400716  |
| C  | 0.180197  | -1.829595 | -3.804377 |

|   |           |           |           |
|---|-----------|-----------|-----------|
| C | -0.295397 | -2.342684 | -5.016392 |
| H | -0.404095 | -1.681039 | -5.873519 |
| C | -0.630359 | -3.688110 | -5.148447 |
| H | -0.999704 | -4.058835 | -6.102554 |
| C | -0.495580 | -4.571196 | -4.076325 |
| C | -0.012011 | -4.066572 | -2.865144 |
| H | 0.097928  | -4.735376 | -2.012962 |
| C | 0.312208  | -2.722460 | -2.728999 |
| H | 0.661112  | -2.351184 | -1.763639 |
| C | -0.888836 | -6.017744 | -4.206116 |
| H | -1.910074 | -6.177356 | -3.838276 |
| H | -0.227343 | -6.664614 | -3.621262 |
| H | -0.859354 | -6.347333 | -5.248724 |
| C | -1.119528 | 1.883340  | -6.859654 |
| H | -2.134383 | 2.139067  | -7.158583 |
| C | -0.901850 | 1.242702  | -5.646058 |
| H | -1.754010 | 1.010341  | -5.012726 |
| C | 2.524761  | 0.013275  | -3.289792 |
| C | 3.190848  | 1.210380  | -2.986545 |
| H | 2.616891  | 2.127936  | -2.877347 |
| C | 4.572023  | 1.263868  | -2.836279 |
| H | 5.051636  | 2.211361  | -2.598526 |
| C | 5.356081  | 0.115181  | -2.989405 |
| C | 6.854131  | 0.178616  | -2.864577 |
| H | 7.161647  | 0.898204  | -2.099503 |
| H | 7.306830  | 0.497372  | -3.811513 |
| H | 7.276971  | -0.798221 | -2.612312 |
| C | 4.704391  | -1.083309 | -3.297250 |
| H | 5.290640  | -1.990881 | -3.430280 |
| C | 3.317739  | -1.131188 | -3.448007 |
| H | 2.844626  | -2.079675 | -3.691705 |
| C | -3.895394 | 0.994057  | -0.701227 |
| H | -3.988042 | 1.999514  | -1.125032 |
| H | -3.536635 | 1.092011  | 0.329911  |
| H | -4.899432 | 0.550111  | -0.682876 |
| C | -2.667661 | -1.804320 | -0.908115 |
| H | -3.677092 | -2.232355 | -0.868787 |
| H | -2.281502 | -1.729501 | 0.114547  |
| H | -2.028247 | -2.489656 | -1.472934 |
| C | -3.511074 | -0.322013 | -3.424606 |
| H | -2.885748 | -0.938755 | -4.079982 |
| H | -3.697720 | 0.637142  | -3.920354 |
| H | -4.478517 | -0.828666 | -3.313498 |
| C | -2.245303 | 3.683588  | -3.242912 |
| H | -3.187467 | 3.170461  | -3.025777 |
| H | -1.950659 | 3.431364  | -4.267001 |
| H | -2.434723 | 4.764075  | -3.202828 |
| C | -1.304207 | 3.968059  | -0.331189 |
| H | -0.507049 | 3.774317  | 0.395340  |
| H | -2.219602 | 3.530337  | 0.080381  |
| H | -1.445581 | 5.053444  | -0.411856 |
| C | 0.683950  | 4.109838  | -2.648042 |
| H | 0.471184  | 5.178625  | -2.778810 |
| H | 0.999284  | 3.713896  | -3.620600 |
| H | 1.524331  | 4.031301  | -1.948507 |
| C | 2.260423  | -2.451650 | 2.666821  |
| C | 1.319686  | -3.607810 | 2.335980  |
| H | 1.794712  | -4.090111 | 1.468441  |

|   |           |           |           |
|---|-----------|-----------|-----------|
| C | 1.302299  | -4.652149 | 3.465709  |
| H | 0.790311  | -4.257416 | 4.349286  |
| H | 2.313244  | -4.953802 | 3.758957  |
| H | 0.756566  | -5.544587 | 3.140281  |
| C | -0.106826 | -3.253551 | 1.906264  |
| H | -0.545001 | -4.112966 | 1.386517  |
| H | -0.118912 | -2.396790 | 1.224322  |
| H | -0.748605 | -3.030396 | 2.764164  |
| C | 3.628134  | -2.699558 | 2.506578  |
| H | 3.943020  | -3.683912 | 2.165780  |
| C | 4.582109  | -1.724681 | 2.773973  |
| H | 5.640209  | -1.953263 | 2.673439  |
| C | 4.176532  | -0.453102 | 3.169297  |
| H | 2.007178  | 2.142063  | -0.575724 |
| H | 4.924546  | 0.309739  | 3.359806  |
| C | 2.827869  | -0.152786 | 3.357835  |
| C | 2.405580  | 1.211527  | 3.873858  |
| H | 1.423431  | 1.437235  | 3.434661  |
| C | 3.364272  | 2.334394  | 3.462065  |
| H | 4.302333  | 2.296051  | 4.028167  |
| H | 2.900889  | 3.303426  | 3.675054  |
| H | 3.602604  | 2.295304  | 2.394531  |
| C | 2.261541  | 1.202301  | 5.405496  |
| H | 3.221084  | 0.957646  | 5.876637  |
| H | 1.517796  | 0.477275  | 5.747511  |
| H | 1.953757  | 2.193976  | 5.757022  |
| C | 1.880926  | -1.175036 | 3.118845  |
| C | -3.810544 | -1.590445 | 3.108048  |
| H | -2.817490 | -1.714272 | 2.657440  |
| C | -4.842635 | -1.786435 | 1.995083  |
| H | -5.864855 | -1.816160 | 2.389014  |
| H | -4.659820 | -2.740299 | 1.490300  |
| H | -4.776936 | -0.989530 | 1.249710  |
| C | -3.995058 | -2.671088 | 4.185585  |
| H | -3.221717 | -2.616392 | 4.956745  |
| H | -3.950606 | -3.668685 | 3.734112  |
| H | -4.970482 | -2.559549 | 4.673576  |
| H | 1.795793  | 2.182341  | 1.026484  |
| H | 3.376260  | 0.390202  | 0.094500  |
| N | 3.572977  | -0.638296 | -0.109033 |
| H | 3.995218  | -0.774800 | -1.028344 |
| H | 4.107119  | -1.081874 | 0.638100  |
| H | 2.524382  | -0.961002 | -0.095132 |

#### Calculated energies and coordinates of H

|                         |     |                   |
|-------------------------|-----|-------------------|
| Electronic energy       | ... | -4113.86291401 Eh |
| Total Enthalpy          | ... | -4112.55936583 Eh |
| Final Gibbs free energy | ... | -4112.74338748 Eh |

#### CARTESIAN COORDINATES (ANGSTROEM)

|    |           |           |           |
|----|-----------|-----------|-----------|
| Si | 0.672752  | 0.092918  | -3.630351 |
| Si | -0.715427 | 0.816266  | -1.851374 |
| Si | 0.570399  | 0.350248  | 0.099113  |
| P  | -0.955451 | 0.649916  | 1.692758  |
| Si | -2.838239 | -0.238226 | -1.807846 |
| Si | -1.050151 | 3.159569  | -1.968256 |

|   |           |           |           |   |           |           |           |
|---|-----------|-----------|-----------|---|-----------|-----------|-----------|
| N | -1.337765 | -0.274400 | 4.232187  | C | 4.369849  | 1.696101  | -2.490102 |
| N | 0.673452  | -0.852174 | 3.630966  | H | 4.840146  | 2.677443  | -2.500464 |
| N | 1.971279  | 1.394277  | 0.234432  | C | 5.030765  | 0.623846  | -1.882657 |
| C | -0.191592 | 3.102911  | -9.009978 | C | 6.350427  | 0.817759  | -1.188569 |
| H | -1.158818 | 2.849225  | -9.453851 | H | 6.193804  | 1.060112  | -0.129405 |
| H | 0.593369  | 2.869593  | -9.735321 | H | 6.920907  | 1.638722  | -1.632740 |
| H | -0.178938 | 4.188129  | -8.849439 | H | 6.960711  | -0.089446 | -1.230574 |
| C | 0.024148  | 2.369370  | -7.714553 | C | 4.410077  | -0.626092 | -1.911800 |
| C | 1.307065  | 2.012307  | -7.294446 | H | 4.909047  | -1.482113 | -1.461828 |
| H | 2.160555  | 2.243735  | -7.928516 | C | 3.160196  | -0.791012 | -2.498875 |
| C | 1.509042  | 1.360750  | -6.081575 | H | 2.711607  | -1.780692 | -2.512939 |
| H | 2.520860  | 1.088234  | -5.789496 | C | -4.041304 | 0.824515  | -0.807533 |
| C | 0.434960  | 1.044673  | -5.238826 | H | -4.171450 | 1.824721  | -1.232731 |
| C | -0.445616 | -0.185463 | 3.177912  | H | -3.685646 | 0.937474  | 0.223106  |
| C | -2.573498 | 0.450554  | 4.308622  | H | -5.027460 | 0.342662  | -0.782049 |
| C | -2.540092 | 1.746998  | 4.837620  | C | -2.792895 | -1.940320 | -0.991091 |
| C | -1.245729 | 2.420726  | 5.251307  | H | -3.817493 | -2.321738 | -0.894969 |
| H | -0.420393 | 1.725179  | 5.066237  | H | -2.359162 | -1.872966 | 0.013154  |
| C | -1.239228 | 2.754485  | 6.748466  | H | -2.217813 | -2.662731 | -1.577254 |
| H | -2.018619 | 3.483054  | 6.997821  | C | -3.533563 | -0.450384 | -3.554797 |
| H | -0.273934 | 3.185653  | 7.036060  | H | -2.848136 | -1.022022 | -4.191208 |
| H | -1.409841 | 1.859542  | 7.356381  | H | -3.725262 | 0.514876  | -4.036810 |
| C | -4.940253 | 1.834571  | 4.542848  | H | -4.486280 | -0.993447 | -3.513449 |
| H | -5.876027 | 2.378512  | 4.636301  | C | -2.423547 | 3.618719  | -3.187589 |
| C | -4.938860 | 0.555219  | 3.998240  | H | -3.342383 | 3.046731  | -3.025927 |
| H | -5.873635 | 0.118800  | 3.662028  | H | -2.098392 | 3.454314  | -4.220072 |
| C | -3.752699 | -0.164628 | 3.863081  | H | -2.668352 | 4.682885  | -3.078576 |
| C | -3.754482 | 2.426308  | 4.951738  | C | -1.518865 | 3.829437  | -0.264810 |
| H | -3.767419 | 3.434269  | 5.356970  | H | -0.736924 | 3.628302  | 0.475825  |
| C | -0.979781 | 3.668986  | 4.398495  | H | -2.437679 | 3.371432  | 0.115725  |
| H | -0.986935 | 3.412581  | 3.334237  | H | -1.671976 | 4.914861  | -0.319912 |
| H | -0.000510 | 4.092736  | 4.649889  | C | 0.501909  | 4.070650  | -2.549116 |
| H | -1.735779 | 4.442361  | 4.575011  | H | 0.325334  | 5.153538  | -2.527175 |
| C | -0.775402 | -0.954925 | 5.299855  | H | 0.751256  | 3.793399  | -3.579800 |
| H | -1.309259 | -1.094628 | 6.226310  | H | 1.369857  | 3.856535  | -1.916544 |
| C | 0.465833  | -1.323692 | 4.924610  | C | 2.249949  | -2.293394 | 2.437850  |
| H | 1.237714  | -1.860062 | 5.452120  | C | 1.332950  | -3.510666 | 2.378406  |
| C | 0.337879  | -1.735166 | -3.967828 | H | 1.678125  | -4.062858 | 1.494314  |
| C | 0.264268  | -2.239515 | -5.272980 | C | 1.563636  | -4.436179 | 3.585627  |
| H | 0.396467  | -1.565554 | -6.116846 | H | 1.188737  | -3.982315 | 4.508958  |
| C | 0.021972  | -3.588168 | -5.513201 | H | 2.626431  | -4.661940 | 3.718958  |
| H | -0.028837 | -3.950525 | -6.538021 | H | 1.027131  | -5.380324 | 3.439834  |
| C | -0.159815 | -4.486799 | -4.459593 | C | -0.165287 | -3.259199 | 2.172468  |
| C | -0.088048 | -3.992142 | -3.154943 | H | -0.632160 | -4.182976 | 1.812896  |
| H | -0.232619 | -4.670019 | -2.315087 | H | -0.354392 | -2.474882 | 1.433050  |
| C | 0.153076  | -2.642897 | -2.916051 | H | -0.672276 | -2.982821 | 3.102702  |
| H | 0.190213  | -2.289269 | -1.886447 | C | 3.539970  | -2.464010 | 1.924079  |
| C | -0.460479 | -5.937268 | -4.721289 | H | 3.806134  | -3.431888 | 1.505939  |
| H | -1.540919 | -6.096870 | -4.824431 | C | 4.465129  | -1.432330 | 1.938244  |
| H | -0.112364 | -6.571154 | -3.900391 | H | 5.460134  | -1.589515 | 1.529880  |
| H | 0.010948  | -6.280641 | -5.646947 | C | 4.123447  | -0.194978 | 2.465783  |
| C | -1.052928 | 2.044773  | -6.885755 | H | 2.679525  | 1.258519  | -0.480853 |
| H | -2.063702 | 2.303327  | -7.195190 | H | 4.851774  | 0.608187  | 2.455551  |
| C | -0.849069 | 1.398690  | -5.672617 | C | 2.856596  | 0.033355  | 2.998730  |
| H | -1.708521 | 1.158753  | -5.050932 | C | 2.494794  | 1.378815  | 3.608067  |
| C | 2.469737  | 0.285220  | -3.069777 | H | 1.463196  | 1.603530  | 3.303750  |
| C | 3.114240  | 1.530993  | -3.065578 | C | 3.374422  | 2.529508  | 3.111652  |
| H | 2.625767  | 2.394244  | -3.509518 | H | 4.385852  | 2.475572  | 3.532072  |

|   |           |           |           |
|---|-----------|-----------|-----------|
| H | 2.941488  | 3.481757  | 3.436087  |
| H | 3.443476  | 2.532446  | 2.021417  |
| C | 2.556941  | 1.336525  | 5.145339  |
| H | 3.571416  | 1.086118  | 5.477283  |
| H | 1.867208  | 0.605897  | 5.574832  |
| H | 2.300577  | 2.320465  | 5.555811  |
| C | 1.937162  | -1.033779 | 2.971631  |
| C | -3.727628 | -1.559490 | 3.267591  |
| H | -2.758773 | -1.676995 | 2.765866  |
| C | -4.811526 | -1.776562 | 2.209524  |
| H | -5.812854 | -1.816680 | 2.653047  |
| H | -4.641801 | -2.730976 | 1.700932  |
| H | -4.793623 | -0.982879 | 1.457298  |
| C | -3.839713 | -2.627935 | 4.366198  |
| H | -3.027674 | -2.551299 | 5.095459  |
| H | -3.802606 | -3.630619 | 3.925858  |
| H | -4.789643 | -2.524261 | 4.903481  |
| H | 1.750092  | 2.382112  | 0.280331  |
| H | 2.551197  | -3.178536 | -0.642398 |
| N | 2.738188  | -4.128113 | -0.955422 |
| H | 2.253202  | -4.225116 | -1.842948 |
| H | 3.729195  | -4.154058 | -1.174811 |
| H | 1.135307  | -1.027596 | -0.037607 |

|   |           |           |           |
|---|-----------|-----------|-----------|
| H | 0.002564  | 3.019743  | 7.423919  |
| H | -1.180243 | 1.724442  | 7.697761  |
| C | -4.952591 | 2.243665  | 5.271905  |
| H | -5.835597 | 2.824955  | 5.522598  |
| C | -5.089614 | 1.043801  | 4.582548  |
| H | -6.079020 | 0.706240  | 4.291583  |
| C | -3.973936 | 0.277828  | 4.248919  |
| C | -3.695716 | 2.711120  | 5.624545  |
| H | -3.601254 | 3.661975  | 6.141708  |
| C | -0.915048 | 3.855818  | 4.942804  |
| H | -1.028143 | 3.731568  | 3.861256  |
| H | 0.104378  | 4.201536  | 5.148367  |
| H | -1.608230 | 4.636031  | 5.276653  |
| C | -0.905657 | -0.813524 | 5.323810  |
| H | -1.338747 | -0.997183 | 6.294444  |
| C | 0.252219  | -1.237760 | 4.766946  |
| H | 1.019007  | -1.895930 | 5.142727  |
| C | 0.350131  | -2.217324 | -3.928894 |
| C | 0.035340  | -2.660368 | -5.218842 |
| H | 0.022343  | -1.951425 | -6.043696 |
| C | -0.256283 | -3.998914 | -5.468633 |
| H | -0.499115 | -4.314830 | -6.481059 |
| C | -0.233653 | -4.945583 | -4.443154 |
| C | 0.090850  | -4.511526 | -3.154215 |
| H | 0.115938  | -5.228211 | -2.335524 |
| C | 0.366322  | -3.173941 | -2.904448 |
| H | 0.593436  | -2.865095 | -1.885575 |
| C | -0.575436 | -6.386587 | -4.706150 |
| H | -0.436527 | -6.643524 | -5.760066 |
| H | -1.622813 | -6.590007 | -4.450986 |
| H | 0.042762  | -7.058329 | -4.102559 |
| C | -0.767653 | 1.487757  | -6.927496 |
| H | -1.753167 | 1.612291  | -7.372321 |
| C | -0.634351 | 0.776743  | -5.741632 |
| H | -1.523712 | 0.356052  | -5.279660 |
| C | 2.583387  | -0.338236 | -3.016497 |
| C | 3.179873  | 0.891197  | -2.695982 |
| H | 2.596000  | 1.808045  | -2.757656 |
| C | 4.518273  | 0.976191  | -2.328222 |
| H | 4.947708  | 1.948353  | -2.097429 |
| C | 5.317522  | -0.167272 | -2.260346 |
| C | 6.745431  | -0.084276 | -1.797746 |
| H | 7.202144  | 0.869758  | -2.078363 |
| H | 7.350086  | -0.893575 | -2.216931 |
| H | 6.800634  | -0.165861 | -0.704231 |
| C | 4.738490  | -1.390454 | -2.602241 |
| H | 5.344187  | -2.294027 | -2.573652 |
| C | 3.400578  | -1.474684 | -2.974230 |
| H | 2.985877  | -2.444582 | -3.238546 |
| C | -4.034843 | 0.249703  | -0.915044 |
| H | -4.200440 | 1.274116  | -1.266196 |
| H | -3.646022 | 0.308933  | 0.108305  |
| H | -5.006397 | -0.260119 | -0.891498 |
| C | -2.787743 | -2.497545 | -1.506112 |
| H | -3.815282 | -2.868140 | -1.397715 |
| H | -2.273008 | -2.648605 | -0.554355 |
| H | -2.283826 | -3.106906 | -2.262853 |
| C | -3.515781 | -0.685741 | -3.795852 |

Calculated energies and coordinates of I

|                         |     |                   |
|-------------------------|-----|-------------------|
| Electronic energy       | ... | -4113.81057979 Eh |
| Total Enthalpy          | ... | -4112.50446237 Eh |
| Final Gibbs free energy | ... | -4112.68754869 Eh |

CARTESIAN COORDINATES (ANGSTROEM)

|    |           |           |           |
|----|-----------|-----------|-----------|
| Si | 0.768924  | -0.420281 | -3.544947 |
| Si | -0.720084 | 0.381266  | -1.860781 |
| Si | 0.099868  | 0.044464  | 0.387874  |
| P  | -1.221114 | 1.084097  | 1.842263  |
| Si | -2.834377 | -0.686192 | -2.031339 |
| Si | -1.090935 | 2.714436  | -2.210292 |
| N  | -1.549757 | -0.028717 | 4.378473  |
| N  | 0.342632  | -0.675816 | 3.498281  |
| N  | 1.670098  | 1.143113  | 0.252138  |
| C  | 0.196713  | 2.855657  | -8.816818 |
| H  | -0.577699 | 2.436282  | -9.466550 |
| H  | 1.134115  | 2.895580  | -9.378780 |
| H  | -0.094968 | 3.887729  | -8.586080 |
| C  | 0.347254  | 2.050258  | -7.555594 |
| C  | 1.596915  | 1.858032  | -6.965162 |
| H  | 2.482303  | 2.273511  | -7.441948 |
| C  | 1.730317  | 1.137115  | -5.781723 |
| H  | 2.722389  | 0.997762  | -5.359465 |
| C  | 0.615790  | 0.586372  | -5.136104 |
| C  | -0.769388 | 0.086336  | 3.248285  |
| C  | -2.717474 | 0.759410  | 4.647297  |
| C  | -2.546841 | 1.980789  | 5.311724  |
| C  | -1.177082 | 2.527944  | 5.666850  |
| H  | -0.419688 | 1.817187  | 5.318695  |
| C  | -1.010067 | 2.676910  | 7.184748  |
| H  | -1.716382 | 3.408550  | 7.592538  |

|   |           |           |           |
|---|-----------|-----------|-----------|
| H | -2.888861 | -1.294288 | -4.457838 |
| H | -3.608109 | 0.318089  | -4.221727 |
| H | -4.516571 | -1.136645 | -3.785539 |
| C | -2.420829 | 3.023871  | -3.519428 |
| H | -3.379707 | 2.575561  | -3.240205 |
| H | -2.129495 | 2.637336  | -4.500172 |
| H | -2.575810 | 4.106270  | -3.616137 |
| C | -1.675033 | 3.579107  | -0.637245 |
| H | -1.904163 | 4.626585  | -0.872898 |
| H | -0.921914 | 3.567725  | 0.157692  |
| H | -2.576813 | 3.117244  | -0.222705 |
| C | 0.476220  | 3.603465  | -2.791806 |
| H | 0.238725  | 4.659003  | -2.976098 |
| H | 0.859251  | 3.179211  | -3.726612 |
| H | 1.277431  | 3.580273  | -2.043627 |
| C | 1.116998  | -1.452379 | 1.256111  |
| C | 0.332540  | -2.804098 | 1.299943  |
| H | 0.257457  | -3.111441 | 0.244583  |
| C | 1.148185  | -3.868653 | 2.040065  |
| H | 1.262736  | -3.592245 | 3.095233  |
| H | 2.151592  | -3.966389 | 1.614825  |
| H | 0.644812  | -4.841200 | 1.996767  |
| C | -1.095844 | -2.767120 | 1.849981  |
| H | -1.627165 | -3.683138 | 1.566160  |
| H | -1.659114 | -1.912576 | 1.457771  |
| H | -1.110666 | -2.712405 | 2.943800  |
| C | 2.394866  | -1.652695 | 0.486394  |
| H | 2.319220  | -2.202650 | -0.448962 |
| C | 3.606293  | -1.184792 | 0.888914  |
| H | 4.466979  | -1.379521 | 0.251145  |
| C | 3.786340  | -0.451925 | 2.091552  |
| H | 2.276509  | 0.875985  | -0.529537 |
| H | 4.775245  | -0.131246 | 2.400367  |
| C | 2.687673  | -0.319344 | 2.958940  |
| C | 2.891140  | 0.420009  | 4.275947  |
| H | 1.928036  | 0.507234  | 4.788650  |
| C | 3.391005  | 1.853186  | 4.047183  |
| H | 4.389119  | 1.859226  | 3.596389  |
| H | 3.449660  | 2.391840  | 5.000625  |
| H | 2.708728  | 2.403009  | 3.388260  |
| C | 3.844619  | -0.343634 | 5.204615  |
| H | 4.849146  | -0.401146 | 4.772901  |
| H | 3.500562  | -1.370433 | 5.367587  |
| H | 3.919808  | 0.154781  | 6.178182  |
| C | 1.442963  | -0.835928 | 2.598304  |
| C | -4.099206 | -1.029714 | 3.492906  |
| H | -3.199170 | -1.125519 | 2.875357  |
| C | -5.301821 | -1.063559 | 2.546776  |
| H | -6.249404 | -1.141088 | 3.092281  |
| H | -5.229209 | -1.939960 | 1.893976  |
| H | -5.336481 | -0.171703 | 1.914027  |
| C | -4.146440 | -2.223322 | 4.459310  |
| H | -3.251706 | -2.270692 | 5.087194  |
| H | -4.213855 | -3.162496 | 3.898813  |
| H | -5.021830 | -2.150967 | 5.115464  |
| H | 1.464758  | 2.136404  | 0.171249  |
| H | 2.239728  | 1.019174  | 1.100363  |
| N | 4.235507  | 2.887162  | 0.695481  |

|   |          |          |          |
|---|----------|----------|----------|
| H | 5.002647 | 3.160478 | 0.090643 |
| H | 4.335500 | 3.439728 | 1.540801 |
| H | 4.417688 | 1.922862 | 0.973842 |

#### Calculated energies and coordinates of TS[I-J]

|                         |     |                   |
|-------------------------|-----|-------------------|
| Electronic energy       | ... | -4113.79644857 Eh |
| Total Enthalpy          | ... | -4112.49594368 Eh |
| Final Gibbs free energy | ... | -4112.67246289 Eh |

#### CARTESIAN COORDINATES (ANGSTROEM)

|    |           |           |           |
|----|-----------|-----------|-----------|
| Si | 0.883726  | -0.391827 | -3.501261 |
| Si | -0.721214 | 0.305049  | -1.857680 |
| Si | 0.166829  | 0.408870  | 0.401337  |
| P  | -1.172878 | 1.398790  | 1.880877  |
| Si | -2.692469 | -1.000544 | -2.088654 |
| Si | -1.345540 | 2.571602  | -2.331782 |
| N  | -1.581826 | 0.188367  | 4.344374  |
| N  | 0.307293  | -0.503572 | 3.478993  |
| N  | 1.498397  | 1.641681  | 0.066980  |
| C  | -0.049956 | 2.613430  | -8.881901 |
| H  | -0.954870 | 2.260124  | -9.385107 |
| H  | 0.794415  | 2.496798  | -9.567563 |
| H  | -0.176556 | 3.687094  | -8.695354 |
| C  | 0.183664  | 1.872746  | -7.593901 |
| C  | 1.475021  | 1.664429  | -7.105710 |
| H  | 2.327117  | 2.018436  | -7.682526 |
| C  | 1.690224  | 1.006288  | -5.898741 |
| H  | 2.710864  | 0.855417  | -5.555804 |
| C  | 0.619864  | 0.536158  | -5.126322 |
| C  | -0.762444 | 0.325609  | 3.240130  |
| C  | -2.694773 | 1.039973  | 4.647092  |
| C  | -2.442396 | 2.224541  | 5.351348  |
| C  | -1.038912 | 2.664334  | 5.722607  |
| H  | -0.329644 | 1.935530  | 5.316139  |
| C  | -0.851801 | 2.695384  | 7.245543  |
| H  | -1.511732 | 3.435421  | 7.711958  |
| H  | 0.180998  | 2.960615  | 7.497134  |
| H  | -1.073876 | 1.719866  | 7.690811  |
| C  | -4.826935 | 2.636951  | 5.353351  |
| H  | -5.669250 | 3.262769  | 5.635023  |
| C  | -5.046096 | 1.469820  | 4.630883  |
| H  | -6.058464 | 1.201834  | 4.346675  |
| C  | -3.983903 | 0.647600  | 4.257254  |
| C  | -3.539196 | 3.013686  | 5.703531  |
| H  | -3.379817 | 3.936856  | 6.253819  |
| C  | -0.702446 | 4.021358  | 5.090019  |
| H  | -0.830991 | 3.978565  | 4.004056  |
| H  | 0.337325  | 4.290642  | 5.307673  |
| H  | -1.343621 | 4.817340  | 5.484839  |
| C  | -1.023253 | -0.701113 | 5.246888  |
| H  | -1.496939 | -0.924436 | 6.189673  |
| C  | 0.121504  | -1.160486 | 4.694072  |
| H  | 0.812999  | -1.912324 | 5.036173  |
| C  | 0.633435  | -2.233818 | -3.839396 |
| C  | 0.105212  | -2.674002 | -5.059961 |
| H  | -0.110426 | -1.952989 | -5.845095 |

C -0.147900 -4.022577 -5.295811  
 H -0.561464 -4.329743 -6.254124  
 C 0.127173 -4.987898 -4.326869  
 C 0.668451 -4.559331 -3.111711  
 H 0.893408 -5.288764 -2.336101  
 C 0.905297 -3.212559 -2.870811  
 H 1.301492 -2.928072 -1.899127  
 C -0.175346 -6.441735 -4.564775  
 H -0.260605 -6.662392 -5.632475  
 H -1.124036 -6.722321 -4.090757  
 H 0.602476 -7.084166 -4.140263  
 C -0.887919 1.391502 -6.837679  
 H -1.904814 1.530005 -7.200132  
 C -0.671022 0.742491 -5.628356  
 H -1.526602 0.385325 -5.061888  
 C 2.690379 -0.069806 -3.017115  
 C 3.147518 1.243323 -2.840603  
 H 2.473144 2.077808 -3.027487  
 C 4.463030 1.517201 -2.471531  
 H 4.786557 2.551547 -2.363254  
 C 5.378773 0.482912 -2.267056  
 C 6.797047 0.759627 -1.846621  
 H 6.986364 1.833206 -1.756248  
 H 7.510064 0.352460 -2.571910  
 H 7.021323 0.290018 -0.881031  
 C 4.940942 -0.827606 -2.478731  
 H 5.641367 -1.650848 -2.351482  
 C 3.630097 -1.097096 -2.851217  
 H 3.333236 -2.129821 -3.016201  
 C -3.934765 -0.292992 -0.854295  
 H -4.256576 0.711694 -1.152113  
 H -3.499690 -0.205625 0.147622  
 H -4.827568 -0.927559 -0.794048  
 C -2.451612 -2.847061 -1.790033  
 H -3.437916 -3.328606 -1.761623  
 H -1.936049 -3.078042 -0.856603  
 H -1.881323 -3.293046 -2.611440  
 C -3.463793 -0.920885 -3.816914  
 H -2.825793 -1.418175 -4.556397  
 H -3.677932 0.094453 -4.161234  
 H -4.414808 -1.468987 -3.788173  
 C -2.805351 2.740124 -3.527127  
 H -3.699860 2.234886 -3.148948  
 H -2.589162 2.363092 -4.529762  
 H -3.043969 3.807769 -3.617321  
 C -1.905239 3.491064 -0.778998  
 H -2.233710 4.497317 -1.070623  
 H -1.116529 3.602080 -0.028007  
 H -2.742292 2.991055 -0.281072  
 C 0.083153 3.575658 -3.068707  
 H -0.280201 4.583148 -3.308459  
 H 0.469896 3.130801 -3.991818  
 H 0.912902 3.693017 -2.361824  
 C 1.059842 -1.132553 1.181449  
 C 0.211369 -2.454910 1.094653  
 H 0.152052 -2.669824 0.015277  
 C 0.952266 -3.612949 1.766758  
 H 1.025056 -3.440868 2.847811

H 1.969891 -3.712568 1.377643  
 H 0.418137 -4.557395 1.611250  
 C -1.228412 -2.388433 1.614996  
 H -1.774646 -3.292673 1.321618  
 H -1.769603 -1.522327 1.216575  
 H -1.264167 -2.339465 2.708340  
 C 2.334643 -1.331594 0.387115  
 H 2.221412 -1.533542 -0.673326  
 C 3.571057 -1.366089 0.941879  
 H 4.418120 -1.598509 0.294957  
 C 3.817916 -1.009553 2.297236  
 H 1.778599 1.600755 -0.914421  
 H 4.802011 -1.145387 2.733411  
 C 2.705215 -0.687732 3.118596  
 C 3.006598 -0.211220 4.536867  
 H 2.071711 0.066288 5.032666  
 C 3.872079 1.057962 4.526296  
 H 4.850315 0.870965 4.070312  
 H 4.038577 1.414662 5.549722  
 H 3.370010 1.858417 3.970639  
 C 3.678076 -1.305779 5.377557  
 H 4.673057 -1.544760 4.988778  
 H 3.097143 -2.234185 5.366730  
 H 3.791225 -0.980601 6.418371  
 C 1.421123 -0.724488 2.606157  
 C -4.205353 -0.631398 3.474641  
 H -3.308463 -0.792394 2.865251  
 C -5.398549 -0.548326 2.520251  
 H -6.352647 -0.535091 3.059372  
 H -5.406557 -1.426683 1.866948  
 H -5.341555 0.342699 1.887593  
 C -4.364939 -1.833078 4.419336  
 H -3.484968 -1.967765 5.054870  
 H -4.506162 -2.753277 3.841455  
 H -5.238405 -1.697081 5.067903  
 H 1.089875 2.563292 0.219835  
 H 2.740706 1.632891 0.688324  
 N 3.901222 1.625286 1.061651  
 H 4.490095 1.538564 0.235685  
 H 4.178522 2.443163 1.594172  
 H 4.019600 0.740820 1.643589

Calculated energies and coordinates of J

Electronic energy ... -4113.84770203 Eh  
 Total Enthalpy ... -4112.54130619 Eh  
 Final Gibbs free energy ... -4112.72225023 Eh

CARTESIAN COORDINATES (ANGSTROEM)

Si 0.884044 -0.467486 -3.449707  
 Si -0.674874 0.282174 -1.787246  
 Si 0.249011 0.437154 0.435204  
 P -1.244378 1.267114 1.883330  
 Si -2.687533 -0.964364 -2.045607  
 Si -1.215292 2.579919 -2.237123  
 N -1.656762 0.021306 4.330192  
 N 0.205184 -0.680339 3.441398

|   |           |           |           |   |           |           |           |
|---|-----------|-----------|-----------|---|-----------|-----------|-----------|
| N | 1.595198  | 1.568107  | 0.321930  | C | 5.433636  | 0.239646  | -2.353640 |
| C | 0.060667  | 2.665628  | -8.774968 | C | 6.867800  | 0.477762  | -1.967854 |
| H | -0.842761 | 2.339070  | -9.298854 | H | 7.175272  | 1.505157  | -2.183944 |
| H | 0.912374  | 2.551645  | -9.451768 | H | 7.541571  | -0.202368 | -2.497787 |
| H | -0.052229 | 3.736330  | -8.564322 | H | 7.015006  | 0.308746  | -0.893114 |
| C | 0.264475  | 1.890993  | -7.501921 | C | 4.962806  | -1.050078 | -2.609039 |
| C | 1.546270  | 1.609490  | -7.025587 | H | 5.655482  | -1.888608 | -2.569262 |
| H | 2.411997  | 1.931379  | -7.600807 | C | 3.627117  | -1.279415 | -2.924068 |
| C | 1.734867  | 0.921438  | -5.830842 | H | 3.305705  | -2.295247 | -3.141180 |
| H | 2.748296  | 0.717688  | -5.493984 | C | -3.926097 | -0.290193 | -0.789279 |
| C | 0.646353  | 0.492047  | -5.060413 | H | -4.159977 | 0.760572  | -0.996300 |
| C | -0.851212 | 0.172009  | 3.218493  | H | -3.533444 | -0.330809 | 0.232017  |
| C | -2.746886 | 0.891743  | 4.661239  | H | -4.863599 | -0.858888 | -0.829719 |
| C | -2.455501 | 2.067116  | 5.365953  | C | -2.493008 | -2.831896 | -1.840957 |
| C | -1.036258 | 2.472415  | 5.716196  | H | -3.490671 | -3.284411 | -1.768804 |
| H | -0.348311 | 1.746201  | 5.269726  | H | -1.923822 | -3.128332 | -0.959287 |
| C | -0.812929 | 2.449365  | 7.234524  | H | -1.993593 | -3.252967 | -2.719625 |
| H | -1.452222 | 3.181999  | 7.739790  | C | -3.471069 | -0.802621 | -3.763828 |
| H | 0.229158  | 2.692867  | 7.469214  | H | -2.854258 | -1.289644 | -4.527394 |
| H | -1.038086 | 1.462587  | 7.652838  | H | -3.668086 | 0.227363  | -4.072162 |
| C | -4.830824 | 2.528477  | 5.406197  | H | -4.433050 | -1.331644 | -3.740014 |
| H | -5.655013 | 3.170553  | 5.704259  | C | -2.691771 | 2.806852  | -3.401721 |
| C | -5.086905 | 1.372119  | 4.678418  | H | -3.596643 | 2.332821  | -3.007735 |
| H | -6.108840 | 1.129727  | 4.405756  | H | -2.511004 | 2.429910  | -4.411350 |
| C | -4.048119 | 0.530066  | 4.283575  | H | -2.892625 | 3.883171  | -3.480564 |
| C | -3.530199 | 2.876476  | 5.739103  | C | -1.711659 | 3.513592  | -0.671363 |
| H | -3.343439 | 3.793533  | 6.290879  | H | -1.975990 | 4.541112  | -0.953775 |
| C | -0.687103 | 3.842668  | 5.120912  | H | -0.910712 | 3.566141  | 0.072298  |
| H | -0.854963 | 3.844669  | 4.039502  | H | -2.578650 | 3.064638  | -0.176456 |
| H | 0.367429  | 4.074118  | 5.307808  | C | 0.243868  | 3.523624  | -2.984210 |
| H | -1.289561 | 4.640715  | 5.568901  | H | -0.071189 | 4.552245  | -3.201460 |
| C | -1.101712 | -0.898429 | 5.210063  | H | 0.598863  | 3.075472  | -3.918011 |
| H | -1.574891 | -1.140289 | 6.148299  | H | 1.081203  | 3.579880  | -2.279446 |
| C | 0.039050  | -1.351093 | 4.647565  | C | 1.052407  | -1.198830 | 1.172389  |
| H | 0.748923  | -2.091486 | 4.980553  | C | 0.203189  | -2.500906 | 0.999900  |
| C | 0.560716  | -2.294561 | -3.816162 | H | 0.138518  | -2.640991 | -0.089679 |
| C | -0.038291 | -2.690332 | -5.019160 | C | 0.942053  | -3.707555 | 1.588708  |
| H | -0.268203 | -1.944277 | -5.776395 | H | 1.017733  | -3.614043 | 2.679451  |
| C | -0.341441 | -4.024807 | -5.274843 | H | 1.958226  | -3.793803 | 1.191640  |
| H | -0.808412 | -4.295874 | -6.219422 | H | 0.400721  | -4.634903 | 1.370811  |
| C | -0.048397 | -5.022023 | -4.344067 | C | -1.238745 | -2.479459 | 1.519164  |
| C | 0.565716  | -4.639623 | -3.148348 | H | -1.762048 | -3.375195 | 1.166790  |
| H | 0.812128  | -5.395918 | -2.405613 | H | -1.788992 | -1.602718 | 1.163876  |
| C | 0.854366  | -3.306359 | -2.889276 | H | -1.287264 | -2.497226 | 2.612305  |
| H | 1.317822  | -3.057841 | -1.937849 | C | 2.323206  | -1.356625 | 0.396341  |
| C | -0.404259 | -6.460115 | -4.602634 | H | 2.212816  | -1.652692 | -0.644172 |
| H | -0.527907 | -6.654272 | -5.671717 | C | 3.545151  | -1.140575 | 0.874733  |
| H | -1.347634 | -6.720890 | -4.107076 | H | 4.404172  | -1.264750 | 0.216811  |
| H | 0.364509  | -7.136190 | -4.215662 | C | 3.808978  | -0.723158 | 2.283366  |
| C | -0.825910 | 1.452175  | -6.746824 | H | 2.193456  | 1.470902  | -0.492850 |
| H | -1.836611 | 1.649910  | -7.099111 | H | 4.428199  | -1.487675 | 2.784346  |
| C | -0.635146 | 0.771929  | -5.550410 | C | 2.562774  | -0.497432 | 3.094668  |
| H | -1.504427 | 0.451126  | -4.983671 | C | 2.759984  | 0.190923  | 4.433344  |
| C | 2.701617  | -0.229807 | -2.981473 | H | 1.851075  | 0.085553  | 5.032519  |
| C | 3.188044  | 1.064644  | -2.750291 | C | 2.966737  | 1.700733  | 4.208703  |
| H | 2.515135  | 1.914836  | -2.841031 | H | 3.885149  | 1.902767  | 3.647559  |
| C | 4.525650  | 1.297133  | -2.449285 | H | 3.039565  | 2.213273  | 5.175470  |
| H | 4.871871  | 2.318005  | -2.299264 | H | 2.124927  | 2.124594  | 3.650468  |



|   |           |           |          |
|---|-----------|-----------|----------|
| C | 3.915859  | -0.403573 | 5.246387 |
| H | 4.881863  | -0.229094 | 4.761029 |
| H | 3.795211  | -1.484180 | 5.385354 |
| H | 3.956103  | 0.063445  | 6.236155 |
| C | 1.354592  | -0.818123 | 2.596403 |
| C | -4.305849 | -0.736271 | 3.490495 |
| H | -3.416635 | -0.915552 | 2.873382 |
| C | -5.502696 | -0.613932 | 2.544353 |
| H | -6.452055 | -0.581550 | 3.090756 |
| H | -5.537801 | -1.485431 | 1.882838 |
| H | -5.427448 | 0.281538  | 1.920141 |
| C | -4.490491 | -1.941212 | 4.426441 |
| H | -3.611820 | -2.101739 | 5.057896 |
| H | -4.656911 | -2.853621 | 3.843005 |
| H | -5.357336 | -1.788767 | 5.079975 |
| H | 1.322544  | 2.537952  | 0.426628 |
| H | 3.797877  | 2.164284  | 1.097530 |
| N | 4.807403  | 2.290353  | 1.036252 |
| H | 5.071409  | 1.859019  | 0.155572 |
| H | 4.972122  | 3.285507  | 0.927272 |
| H | 4.429672  | 0.185388  | 2.290826 |

## Crystallographic Details

Data were collected on a single crystal X-ray diffractometer equipped with a CPAD detector (Bruker Photon-II), a TXS rotating anode with MoK $\alpha$  radiation ( $\lambda = 0.71073 \text{ \AA}$ ) and a Helios optic using the APEX4 software package.<sup>16</sup> The crystal was fixed on the top of a kapton micro sampler with perfluorinated ether and transferred to the diffractometer, and frozen under a stream of cold nitrogen. A matrix scan was used to determine the initial lattice parameters. Reflections were corrected for Lorentz and polarisation effects, scan speed, and background using SAINT.<sup>17</sup> Absorption correction, including odd and even ordered spherical harmonics was performed using SADABS.<sup>18</sup> Space group assignment was based upon systematic absences, E statistics, and successful refinement of the structure. The structures were solved using SHELXT with the aid of successive difference Fourier maps and were refined against all data using SHELXL in conjunction with SHELXLE.<sup>18-20</sup> Hydrogen atoms (except on heteroatoms) were calculated in ideal positions as follows: Methyl hydrogen atoms were refined as part of rigid rotating groups, with a C–H distance of 0.98  $\text{\AA}$  and  $U_{\text{iso}}(\text{H}) = 1.5 \cdot U_{\text{eq}}(\text{C})$ . Non-methyl H atoms were placed in calculated positions and refined using a riding model with methylene, aromatic, and other C–H distances of 0.99  $\text{\AA}$ , 0.95  $\text{\AA}$ , and 1.00  $\text{\AA}$ , respectively, and  $U_{\text{iso}}(\text{H}) = 1.2 \cdot U_{\text{eq}}(\text{C})$ . Non-hydrogen atoms were refined with anisotropic displacement parameters. Full-matrix least-squares refinements were carried out by minimizing  $\sum w(F_o^2 - F_c^2)^2$  with the SHELXL weighting scheme. Neutral atom scattering factors for all atoms and anomalous dispersion corrections for the non-hydrogen atoms were taken from International Tables for Crystallography.<sup>21</sup> Images of the crystal structure were generated with Mercury and PLATON.<sup>22, 23</sup> Deposition Number 2377544 contains the supplementary crystallographic data for this paper. These data are provided free of charge by the joint Cambridge Crystallographic Data Centre and Fachinformationszentrum Karlsruhe Access Structures service [www.ccdc.cam.ac.uk/structures](http://www.ccdc.cam.ac.uk/structures).

Compound 2 (CCDC = 2377544)

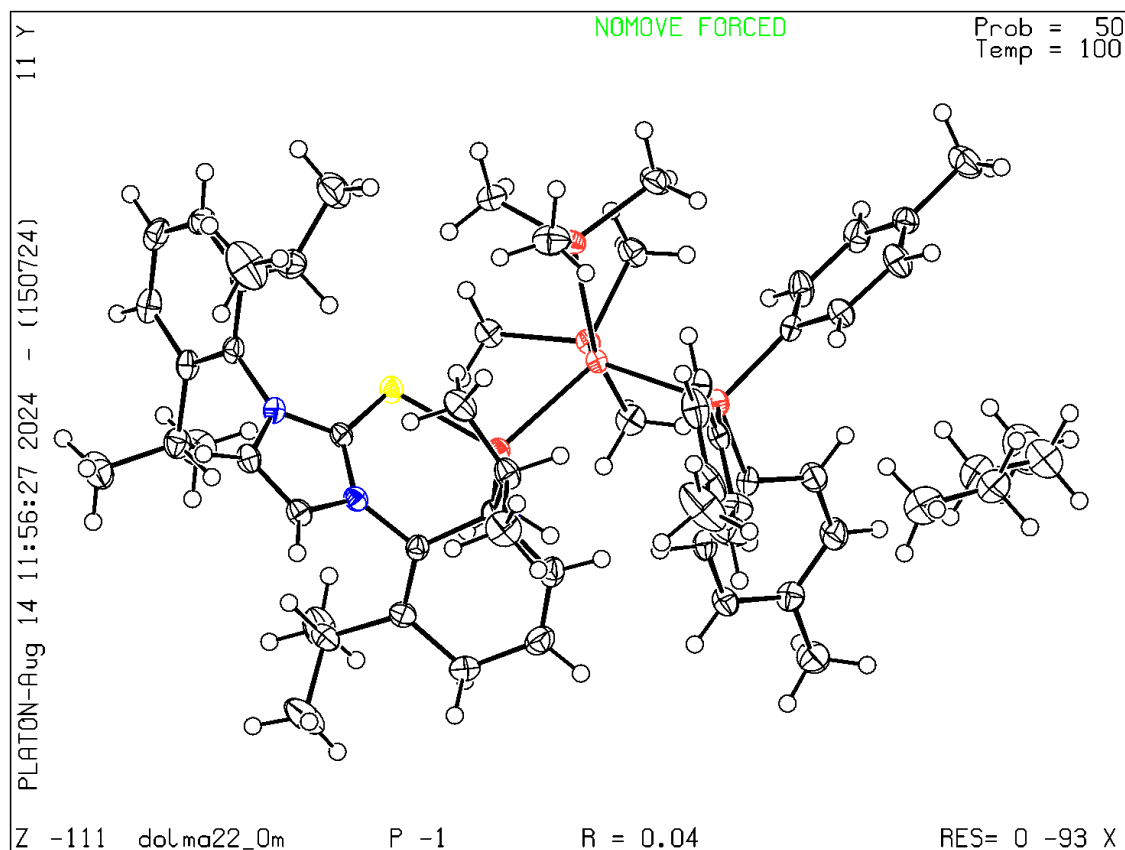

Supplementary Figure 11: PLATON generated image of compound 2.

Diffractometer operator J.Y. Liu  
scanspeed 8s per frame dx 41 mm  
1779 frames measured in 6 data sets  
phi-scans with  $\Delta\phi = 0.5$   
omega-scans with  $\Delta\omega = 0.5$   
shutterless mode

*Crystal data*

$C_{54}H_{78}N_3PSi_5 \cdot C_5H_{12}$

$M_r = 1012.76$

Triclinic, *P*

Hall symbol: -P 1

$a = 13.1621 (7) \text{ \AA}$

$b = 13.9425 (8) \text{ \AA}$

$c = 17.0349 (10) \text{ \AA}$

$\alpha = 93.904 (2)^\circ$

$F(000) = 1100$

$D_x = 1.117 \text{ Mg m}^{-3}$

Mo  $K\alpha$  radiation,  $\lambda = 0.71073 \text{ \AA}$

Cell parameters from 9737 reflections

$\theta = 2.4\text{--}25.7^\circ$

$\mu = 0.18 \text{ mm}^{-1}$

$\beta = 102.733 (2)^\circ$

$T = 100 \text{ K}$

$\gamma = 96.997 (2)^\circ$

Fragment, colorless

$V = 3012.0 (3) \text{ \AA}^3$

$0.23 \times 0.19 \times 0.18 \text{ mm}$

$Z = 2$

### Data collection

Bruker Photon CMOS 11227 independent reflections  
diffractometer

Radiation source: TXS rotating anode 8755 reflections with  $I > 2\sigma(I)$

Helios optic monochromator  $R_{\text{int}} = 0.099$

Detector resolution: 16 pixels  $\text{mm}^{-1}$   $\theta_{\text{max}} = 25.7^\circ$ ,  $\theta_{\text{min}} = 2.3^\circ$

phi- and  $\omega$ -rotation scans  $h = -16 \text{ } 16$

Absorption correction: multi-scan  $k = -17 \text{ } 17$   
SADABS 2016/2, Bruker, 2016

$T_{\text{min}} = 0.639$ ,  $T_{\text{max}} = 0.745$   $l = -20 \text{ } 20$

69338 measured reflections

### Refinement

Refinement on  $F^2$  Secondary atom site location: difference Fourier map

Least-squares matrix: full Hydrogen site location: mixed

$R[F^2 > 2\sigma(F^2)] = 0.043$  H atoms treated by a mixture of independent and constrained refinement

$wR(F^2) = 0.114$   $W = 1/[\Sigma^2(FO^2) + (0.0561P)^2 + 7.2754P]$  WHERE  $P = (FO^2 + 2FC^2)/3$

$S = 0.74$   $(\Delta/\sigma)_{\text{max}} = 0.001$

11227 reflections  $\Delta\rho_{\text{max}} = 0.38 \text{ e \AA}^{-3}$

638 parameters  $\Delta\rho_{\text{min}} = -0.25 \text{ e \AA}^{-3}$

0 restraints Extinction correction: -

0 constraints Extinction coefficient: -

Primary atom site location: iterative

## References

1. M. Muhr, P. Heiß, M. Schütz, R. Bühler, C. Gemel, M. H. Linden, H. B. Linden and R. A. Fischer, *Dalton Trans.*, 2021, **50**, 9031-9036.
2. M. E. Doleschal, A. Kostenko, J. Y. Liu and S. Inoue, *Nat. Chem.*, DOI: 10.1038/s41557-024-01618-6.
3. F. Neese, *WIREs Computational Molecular Science*, 2022, **12**, e1606.
4. J. W. Furness, A. D. Kaplan, J. Ning, J. P. Perdew and J. Sun, *The Journal of Physical Chemistry Letters*, 2020, **11**, 9248-9248.
5. J. W. Furness, A. D. Kaplan, J. Ning, J. P. Perdew and J. Sun, *The Journal of Physical Chemistry Letters*, 2020, **11**, 8208-8215.
6. H. Kruse and S. Grimme, *J. Chem. Phys.*, 2012, **136**.
7. E. Caldeweyher, C. Bannwarth and S. Grimme, *J. Chem. Phys.*, 2017, **147**.
8. E. Caldeweyher, S. Ehlert, A. Hansen, H. Neugebauer, S. Spicher, C. Bannwarth and S. Grimme, *J. Chem. Phys.*, 2019, **150**.
9. E. Caldeweyher, J.-M. Mewes, S. Ehlert and S. Grimme, *Physical Chemistry Chemical Physics*, 2020, **22**, 8499-8512.
10. S. Grimme, A. Hansen, S. Ehlert and J.-M. Mewes, *J. Chem. Phys.*, 2021, **154**.
11. A. V. Marenich, C. J. Cramer and D. G. Truhlar, *The Journal of Physical Chemistry B*, 2009, **113**, 6378-6396.
12. Y. Zhao and D. G. Truhlar, *The Journal of Physical Chemistry A*, 2005, **109**, 5656-5667.
13. F. Weigend and R. Ahlrichs, *Physical Chemistry Chemical Physics*, 2005, **7**, 3297-3305.
14. F. Weigend, *Physical Chemistry Chemical Physics*, 2006, **8**, 1057-1065.
15. A. Hellweg, C. Hättig, S. Höfener and W. Klopper, *Theoretical Chemistry Accounts*, 2007, **117**, 587-597.
16. Bruker AXS Inc. *APEX suite of crystallographic software; Madison, Wisconsin, USA*, 2021.
17. *SAINT, Version 8.40A and SADABS, Version 2016/2, Bruker AXS Inc., Madison, Wisconsin, USA*, 2016/2019.
18. G. Sheldrick, *Acta Crystallographica Section A*, 2015, **71**, 3-8.
19. C. B. Hubschle, G. M. Sheldrick and B. Dittrich, *Journal of Applied Crystallography*, 2011, **44**, 1281-1284.
20. G. Sheldrick, *Acta Crystallographica Section C*, 2015, **71**, 3-8.
21. *International Tables for Crystallography, Vol. C (Ed.: A. J. Wilson), Kluwer Academic Publishers, Dordrecht, The Netherlands, Tables 6.1.1.4 (pp. 500–502), 4.2.6.8 (pp. 219–222), and 4.2.4.2 (pp. 193–199)*. 1992.
22. C. F. Macrae, I. J. Bruno, J. A. Chisholm, P. R. Edgington, P. McCabe, E. Pidcock, L. Rodriguez-Monge, R. Taylor, J. van de Streek and P. A. Wood, *Journal of Applied Crystallography*, 2008, **41**, 466-470.
23. A. Spek, *Acta Crystallographica Section D*, 2009, **65**, 148-155.
